# Supplementary material
Source: publisher figshare collection journal article supplement (https://gsajournals.figshare.com/ndownloader/files/34634147)
Supplement: Supplementary file 1 [file 34634147]

ID	SNP1	SNP2	SNP3	SNP4	SNP5	SNP6	SNP7	SNP8	SNP9	SNP10	SNP11	SNP12	SNP13	SNP14	SNP15	SNP16	SNP17	SNP18	SNP19	SNP20	SNP21	SNP22	SNP23	SNP24	SNP25	SNP26	SNP27	SNP28	SNP29	SNP30	SNP31	SNP32	SNP33	SNP34	SNP35	SNP36	SNP37	SNP38	SNP39	SNP40	SNP41	SNP42	SNP43	SNP44	SNP45	SNP46	SNP47	SNP48	SNP49
375	2	0	0	0	1	2	2	2	2	1	2	2	0	1	0	1	1	1	2	0	2	0	1	1	1	0	0	0	0	0	0	1	2	0	0	0	0	2	0	0	0	0	0	0	2	2	1	0	2
377	0	1	1	1	0	1	2	2	1	1	1	2	0	2	0	2	0	0	1	1	1	0	1	1	0	0	0	0	0	0	0	0	1	0	0	0	1	0	0	2	0	1	0	0	1	1	1	0	0
378	0	1	1	1	2	1	1	1	0	1	1	1	1	0	0	1	1	1	1	1	1	0	1	1	1	0	0	0	0	1	1	0	0	1	1	1	1	0	0	0	0	1	1	1	1	1	0	0	0
74	2	0	0	0	1	1	1	1	1	1	1	1	1	2	0	1	0	0	1	1	1	0	0	0	0	1	0	0	0	0	1	0	0	0	0	0	1	0	0	1	0	1	0	1	0	0	1	1	0
75	1	1	0	0	0	0	0	0	0	0	0	2	0	2	0	2	2	2	2	0	2	0	0	0	1	1	0	0	0	0	1	1	1	0	0	0	0	0	0	1	0	0	0	0	2	2	0	0	0
77	1	1	0	0	1	0	0	0	0	0	1	2	0	2	0	0	1	0	1	0	1	0	0	0	0	2	0	0	0	0	2	0	1	1	1	1	0	1	1	1	0	1	0	0	2	2	1	0	0
78	0	0	2	2	0	2	2	2	0	0	1	1	1	1	0	0	1	0	0	1	0	0	1	1	0	0	0	0	0	0	0	2	2	0	0	0	0	0	0	2	0	0	0	0	2	2	0	0	0
79	1	0	1	1	0	0	0	0	0	1	1	1	1	2	0	1	2	1	1	0	1	0	0	0	0	1	0	0	0	0	1	1	1	0	2	0	0	0	0	2	0	0	0	0	2	2	0	1	0
80	1	0	1	1	0	0	0	0	0	1	1	1	1	2	0	1	0	0	0	1	0	0	0	0	2	0	0	0	0	0	0	0	1	0	0	0	0	0	0	0	1	1	0	1	0	0	2	0	1
170	2	0	0	0	0	1	1	1	0	1	1	1	0	0	0	0	0	0	0	0	1	0	0	0	2	0	0	0	0	0	0	0	0	0	0	0	0	0	0	1	1	1	0	0	1	1	0	0	1
171	1	0	1	1	0	0	0	0	0	2	2	1	0	0	0	0	0	0	1	1	1	0	0	0	2	0	1	0	0	0	0	0	0	0	0	0	1	1	0	0	1	0	0	0	2	2	0	0	1
172	1	1	0	0	0	1	1	1	0	0	1	0	1	1	0	0	0	0	0	1	1	0	0	0	2	0	0	0	0	0	0	0	2	0	0	0	1	0	0	1	1	0	0	0	2	2	0	0	1
173	0	1	1	1	0	0	0	0	0	2	1	1	0	0	0	1	0	0	1	0	1	0	1	1	1	0	1	0	0	1	1	1	0	0	0	0	0	2	1	1	0	2	0	1	0	0	2	0	0
174	0	2	0	0	0	0	0	0	0	2	1	0	1	1	0	1	0	0	1	0	1	0	1	1	1	0	0	0	0	0	1	0	0	1	0	0	0	1	1	1	1	1	0	1	1	1	1	0	1
175	1	1	0	0	0	1	1	1	0	0	1	1	1	0	0	0	0	0	1	0	1	0	0	0	2	0	0	0	0	0	0	0	1	0	0	0	0	1	0	0	1	1	0	0	1	1	0	0	1
176	1	1	0	0	0	1	1	1	0	0	1	0	1	1	0	0	0	0	1	0	1	0	0	0	2	0	0	0	0	0	0	0	2	0	0	0	0	1	0	0	1	1	0	0	1	1	0	0	1
177	2	0	0	0	0	1	1	1	0	1	1	0	1	0	0	0	0	0	0	0	1	0	0	0	2	0	0	0	0	0	0	0	1	0	0	0	0	0	0	1	1	1	0	0	1	1	0	0	1
178	1	1	0	0	0	1	1	1	1	1	1	1	0	0	0	0	0	0	1	1	1	0	0	0	2	0	1	0	0	1	0	0	0	0	0	0	0	1	0	0	1	1	0	1	1	1	2	0	1
181	0	1	1	1	0	0	0	0	0	2	1	1	1	2	0	1	0	0	1	0	1	0	0	0	2	0	0	0	0	0	0	0	1	0	0	0	0	2	1	1	0	2	0	1	0	0	2	0	2
182	0	0	2	2	0	0	0	0	0	2	1	1	1	1	0	1	0	0	1	0	1	0	0	0	2	0	1	0	0	1	0	1	1	0	0	0	0	2	1	1	0	1	0	1	0	1	2	0	0
184	0	1	1	1	0	0	0	0	0	1	2	0	0	1	0	0	0	0	1	1	1	0	0	0	2	0	0	0	0	0	0	0	1	0	0	0	1	1	0	0	1	0	0	0	2	2	0	0	1
185	1	1	0	0	0	1	1	1	0	0	1	0	1	1	0	0	0	0	1	0	1	0	0	0	2	0	0	0	0	0	0	0	2	0	0	0	0	1	0	0	1	1	0	0	1	1	0	0	1
186	0	2	0	0	0	0	0	0	0	0	1	0	0	2	0	0	0	0	0	0	0	0	0	0	1	1	1	1	1	1	0	1	0	1	1	1	1	1	0	0	2	2	0	1	0	0	0	0	1
187	1	0	1	1	0	0	0	0	0	2	2	1	0	0	0	0	0	0	0	0	1	0	0	0	2	0	0	0	0	0	0	0	0	0	0	0	0	0	0	1	1	1	0	0	1	1	0	0	1
188	2	0	0	0	0	1	1	1	0	1	1	1	1	0	0	0	0	0	0	0	1	0	0	0	2	0	0	0	0	0	0	0	1	0	0	0	0	0	0	1	1	1	0	0	1	1	0	0	1
189	1	1	0	0	0	1	2	2	0	0	1	1	1	1	0	0	0	0	1	0	1	0	0	0	2	0	0	0	0	0	0	0	2	0	0	0	0	1	0	0	1	1	0	0	1	1	0	0	1
190	0	2	0	0	0	0	0	0	0	0	1	1	1	1	0	0	0	0	0	0	0	0	0	0	1	1	1	1	1	1	0	1	0	1	1	1	2	0	1	0	2	2	0	1	0	0	0	0	2
191	0	1	1	1	0	0	0	0	0	2	1	1	0	0	0	1	0	0	1	1	1	0	1	1	1	0	1	0	0	1	1	1	0	0	0	0	0	2	1	1	1	0	0	0	1	2	1	0	0
193	1	0	1	1	0	1	1	1	0	1	0	0	2	1	0	1	0	0	0	0	0	0	0	0	2	0	0	0	0	0	0	0	2	0	0	0	0	1	1	0	1	2	0	1	0	0	1	0	1
195	2	0	0	0	0	1	1	1	0	1	1	1	0	0	0	0	0	0	0	1	1	0	0	0	2	0	0	0	0	0	0	0	0	0	0	0	1	0	0	1	1	1	0	0	2	2	0	0	1
196	1	1	1	1	0	0	0	0	0	2	1	1	0	1	0	1	0	0	1	1	1	0	1	1	1	0	1	0	0	1	1	1	1	1	0	0	0	1	1	1	1	1	0	0	1	1	0	0	1
197	0	1	1	1	0	0	0	0	0	2	1	0	1	0	0	1	0	0	1	1	1	0	1	1	1	0	1	0	0	1	1	1	0	1	0	0	0	1	1	1	1	0	0	0	1	2	1	0	1
198	0	0	2	2	0	0	0	0	0	2	1	1	1	1	0	1	0	0	1	0	1	0	0	0	2	0	0	0	0	0	0	0	1	1	0	0	0	2	1	1	0	2	0	1	0	0	2	0	2
427	0	1	1	1	0	0	0	0	0	2	1	1	1	0	0	1	0	0	1	1	1	0	1	1	1	0	1	0	0	1	1	1	0	1	0	0	0	0	1	1	1	0	0	0	1	2	1	0	2
202	1	0	1	1	0	0	0	0	0	2	2	1	0	0	0	0	0	0	0	1	1	0	0	0	2	0	0	0	0	0	0	0	0	0	0	0	1	0	0	1	1	0	0	0	2	2	0	0	1
203	0	1	1	1	0	0	0	0	0	1	2	1	0	1	0	0	0	0	1	1	1	0	0	0	2	0	0	0	0	0	0	0	1	0	0	0	1	1	0	0	1	0	0	0	2	2	0	0	1
205	0	2	0	0	0	1	1	1	1	1	1	1	0	1	1	0	0	0	1	1	1	0	0	0	2	0	0	0	0	0	0	0	0	0	0	0	0	2	0	0	1	0	0	1	1	1	1	0	0
207	1	1	0	0	1	1	1	1	1	0	0	2	0	1	1	0	0	0	0	2	0	0	0	0	2	0	0	0	0	0	0	0	1	0	0	0	1	1	0	1	2	1	0	1	1	1	0	0	1
209	1	1	0	0	1	0	0	0	0	2	1	1	0	1	0	0	0	0	1	0	1	0	0	0	2	0	0	0	0	0	1	0	2	1	0	0	0	1	0	1	0	1	1	1	1	1	0	0	1
211	0	2	0	0	1	0	0	0	0	1	1	0	2	0	0	0	0	0	0	0	0	0	0	0	1	1	0	0	0	0	1	0	1	0	0	0	1	0	0	0	1	0	0	0	2	2	0	0	1
212	0	2	0	0	1	0	0	0	0	2	2	0	0	0	0	1	0	0	0	0	0	0	0	0	1	1	0	0	0	0	0	0	2	0	0	0	0	2	0	2	0	0	0	0	2	2	0	0	1
214	0	2	0	0	0	0	0	0	0	1	2	0	1	1	0	0	0	0	0	0	0	0	0	0	1	1	0	0	0	0	1	0	2	0	0	0	2	0	0	0	1	0	0	0	2	2	0	0	1
215	1	1	0	0	0	0	0	0	0	0	1	0	1	1	0	0	0	0	0	0	0	0	0	0	2	0	0	0	0	0	1	1	2	0	0	0	1	0	0	0	1	0	0	0	2	2	0	0	0
220	0	2	0	0	0	0	0	0	0	0	0	0	2	1	0	1	0	0	0	0	0	0	0	0	1	1	0	0	0	0	1	0	0	1	1	1	1	0	0	0	2	0	0	0	2	2	0	0	0
221	1	0	1	1	1	0	0	0	0	1	0	2	0	1	0	1	0	0	1	1	1	0	1	1	1	0	0	0	0	0	0	1	2	1	0	0	0	1	0	1	0	0	0	1	1	1	1	0	0
222	2	0	0	0	2	0	0	0	0	1	0	1	0	1	0	0	0	0	1	1	1	0	0	0	1	0	0	0	0	0	0	2	2	1	0	0	0	1	0	1	0	0	0	1	1	1	1	0	0
223	1	0	1	1	0	0	0	0	0	0	0	2	0	0	0	1	0	0	2	0	2	0	1	1	1	0	0	0	0	0	1	0	1	2	0	0	1	0	0	2	0	1	1	2	0	0	1	0	1
225	1	0	1	1	2	0	0	0	0	1	0	2	0	1	0	1	0	0	1	1	1	0	1	1	1	0	0	0	0	0	0	1	2	1	0	0	0	1	0	1	0	0	0	1	1	1	1	0	0
228	1	0	1	1	0	0	0	0	0	0	1	1	0	0	0	1	0	0	2	0	2	0	1	1	1	0	0	0	0	0	0	1	1	1	0	0	0	2	0	1	1	1	1	2	0	0	1	0	1
229	1	0	1	1	0	0	0	0	0	0	1	2	0	0	0	1	0	0	2	0	2	0	1	1	1	0	0	0	0	0	0	1	1	1	0	0	1	0	1	1	1	0	0	1	1	1	2	0	1
230	1	1	1	1	2	0	0	0	0	1	1	1	0	0	0	1	0	0	2	0	2	0	1	1	1	0	0	0	0	0	0	1	1	1	0	0	0	0	1	1	1	1	0	1	1	1	2	0	1
231	1	0	1	1	0	0	0	0	0	0	1	0	0	0	0	1	0	0	2	0	2	0	1	1	1	0	0	0	0	0	0	1	1	1	0	0	1	0	1	1	1	0	0	1	1	1	2	0	1
232	1	0	1	1	1	0	0	0	0	0	2	0	0	0	0	1	0	0	2	0	2	0	1	1	1	0	0	0	0	0	0	1	2	1	0	0	1	0	1	0	1	0	0	1	1	1	2	0	1
233	0	0	1	1	0	0	0	0	0	0	1	2	0	0	0	1	0	0	2	0	2	0	1	1	1	0	0	0	0	0	0	1	1	1	0	0	1	0	1	1	1	0	0	1	1	1	2	0	1
234	1	0	0	1	0	0	0	0	0	0	1	2	0	0	0	1	0	0	2	0	2	0	1	1	1	0	0	0	0	0	0	1	1	1	0	0	0	0	0	1	0	1	1	2	0	0	1	0	1
236	0	1	2	2	2	0	0	0	0	1	1	1	0	0	0	0	0	0	2	0	2	0	1	1	1	0	0	0	0	0	0	1	1	0	0	0	0	2	0	1	1	1	1	2	0	0	0	0	1
240	1	1	0	0	1	0	0	0	0	1	1	1	0	0	0	1	1	1	1	0	1	0	0	0	1	0	0	0	0	0	0	1	0	0	0	0	0	2	0	0	0	0	0	0	2	2	1	0	0
241	1	1	0	0	1	0	0	0	0	1	1	1	0	0	0	1	1	1	1	0	1	0	0	0	1	0	0	0	0	0	0	1	1	0	0	0	0	2	0	0	0	0	0	0	2	2	1	0	0
244	1	0	1	1	1	0	0	0	0	1	1	0	1	0	0	1	2	2	1	0	1	0	0	0	0	0	0	0	0	0	0	1	1	0	0	0	1	1	0	0	0	0	0	1	1	1	1	0	0
245	0	1	0	1	0	0	0	0	0	1	0	1	1	1	1	2	0	0	2	0	2	1	1	1	0	0	0	0	0	1	0	0	1	1	0	0	0	1	0	1	0	1	1	2	0	0	1	0	0
246	1	1	2	2	0	0	0	0	0	2	2	1	0	0	0	0	2	2	1	0	1	0	0	0	0	0	0	0	0	0	0	1	0	0	0	0	0	2	0	0	0	0	0	0	2	2	1	0	0
247	1	1	0	0	1	0	0	0	0	1	0	0	1	1	1	0	1	1	1	0	1	1	0	0	0	0	0	0	0	1	0	1	1	0	0	0	0	2	0	0	0	1	1	1	1	1	1	0	0
248	0	1	1	1	0	0	0	0	0	1	0	1	1	1	1	2	0	0	2	0	2	1	1	1	0	0	0	0	0	1	0	0	1	1	0	0	0	1	0	1	0	1	1	2	0	0	1	0	0
249	0	0	2	2	0	0	0	0	0	1	1	1	0	0	0	2	1	1	2	0	2	0	1	1	0	0	0	0	0	0	0	0	1	1	0	0	1	0	0	1	0	0	0	2	0	0	1	0	0
250	0	0	2	2	0	0	0	0	0	1	1	2	0	0	0	2	1	1	2	0	2	0	1	1	0	0	0	0	0	0	0	0	1	1	0	0	1	0	0	1	0	0	0	2	0	0	1	0	0
252	1	0	2	2	1	0	0	0	0	1	1	1	0	0	0	2	2	2	1	0	1	0	0	0	0	0	0	0	0	0	0	1	1	1	0	0	1	0	0	1	0	0	0	2	0	0	1	0	0
253	0	0	2	2	0	0	0	0	0	1	1	1	0	0	0	2	1	1	2	0	2	0	1	1	0	0	0	0	0	0	0	0	1	1	0	0	1	0	0	1	0	0	0	2	0	0	1	0	0
255	0	1	1	1	0	0	0	0	0	1	0	2	0	1	1	2	0	0	2	0	2	1	1	1	0	0	0	0	0	1	0	0	1	1	0	0	0	1	0	1	0	1	1	2	0	0	1	0	0
261	2	0	0	0	0	1	1	1	0	0	0	0	1	1	0	1	0	0	0	0	0	0	0	0	1	0	0	0	0	0	0	0	1	0	0	0	1	0	0	0	0	2	0	0	0	0	0	0	1
263	0	1	2	2	0	0	0	0	0	1	0	2	0	2	1	0	0	0	2	0	2	0	0	0	2	0	0	0	0	0	0	0	2	1	1	1	0	0	0	2	0	1	0	1	1	1	0	0	0
264	1	0	1	1	0	0	0	0	0	1	0	1	0	2	1	0	1	1	1	0	1	0	1	1	1	1	0	0	0	0	1	1	1	1	1	1	1	0	0	1	0	2	0	2	0	0	0	0	0
265	1	1	0	0	0	2	2	2	2	0	0	0	1	1	0	0	1	1	1	0	1	0	0	0	0	0	0	0	0	0	0	1	0	1	0	0	1	1	0	0	0	0	0	0	2	2	1	0	1
268	2	0	0	0	1	1	1	1	1	2	1	1	0	1	0	1	0	0	0	1	0	0	0	0	1	0	1	0	0	1	0	0	1	0	0	0	0	1	0	1	1	0	0	0	2	2	0	0	1
269	2	0	0	0	1	1	1	1	1	2	1	1	0	1	0	1	1	1	0	1	0	0	0	0	1	0	1	0	0	1	0	1	1	1	0	0	0	0	0	0	1	0	0	0	2	2	0	0	0
270	2	0	0	0	1	1	1	1	1	2	1	1	0	1	0	1	1	1	0	1	0	0	0	0	1	0	1	0	0	1	0	1	1	1	0	0	0	0	0	0	1	0	0	0	2	2	0	0	1
271	1	1	0	0	0	0	0	0	0	1	1	0	2	2	0	0	1	1	1	0	1	0	0	0	2	0	0	0	0	0	0	1	0	1	1	1	1	0	0	0	2	1	0	1	0	0	2	0	2
273	0	2	0	0	0	0	0	0	0	0	1	0	2	2	0	0	1	1	1	0	1	0	0	0	2	0	0	0	0	0	0	1	0	1	1	1	1	0	0	0	2	1	0	1	0	0	2	0	2
274	1	1	0	0	0	0	0	0	0	0	2	0	2	2	0	0	0	0	1	0	1	0	0	0	2	0	0	0	0	0	0	0	0	0	0	0	1	0	0	0	2	0	0	1	1	1	2	0	1
275	1	1	0	0	0	1	0	0	0	0	2	0	2	2	0	0	1	1	1	0	1	0	0	0	2	0	0	0	0	0	0	1	0	1	1	1	1	0	0	0	2	1	0	1	0	0	2	0	2
276	0	2	0	0	0	0	0	0	0	1	0	1	1	2	0	1	2	1	0	0	0	0	0	0	0	2	0	0	0	0	1	0	0	1	1	1	0	0	0	1	1	1	0	0	1	1	1	0	1
277	1	1	0	0	0	0	0	0	0	0	2	0	2	2	0	0	0	0	1	0	1	0	0	0	2	0	0	0	0	0	0	1	0	0	0	0	1	0	0	0	2	0	0	1	1	1	2	0	2
278	1	1	0	0	0	0	0	0	0	0	2	1	1	2	0	0	0	0	1	0	1	0	0	0	2	0	0	0	0	0	0	1	0	0	0	0	1	0	0	0	2	0	0	1	1	1	2	0	2
282	0	0	2	2	0	0	0	0	0	2	2	2	0	0	0	1	2	2	2	0	2	0	0	0	1	0	1	0	0	1	0	1	0	0	0	0	1	1	0	1	0	0	0	1	0	1	1	0	0
284	0	1	1	1	0	0	0	0	0	2	2	0	0	1	0	1	0	0	1	1	1	0	0	0	2	0	0	0	0	0	0	0	0	0	0	0	1	1	0	0	2	1	0	1	1	1	1	0	1
285	1	0	1	1	0	1	1	1	1	1	0	1	1	1	0	2	0	0	1	0	1	0	1	1	1	0	0	0	0	0	0	1	1	0	0	0	0	2	1	0	0	1	0	1	1	1	1	0	1
286	1	0	1	1	0	1	1	1	1	1	0	1	1	1	0	2	0	0	1	0	1	1	0	0	1	0	0	0	0	1	0	1	1	0	0	0	1	1	1	1	0	1	0	2	0	0	1	0	0
287	1	1	0	0	0	1	1	1	0	1	0	1	0	0	0	2	0	0	1	1	1	0	2	2	0	0	0	0	0	0	1	1	0	1	0	0	1	0	1	0	2	0	0	0	2	2	0	0	1
290	0	0	2	2	0	0	0	0	0	2	0	0	1	1	0	1	0	0	1	0	1	0	0	0	2	0	0	0	0	0	0	0	1	1	1	1	1	1	1	0	0	2	0	2	0	0	1	0	2
291	0	1	1	1	0	0	0	0	0	2	0	0	1	2	0	1	0	0	0	1	0	0	0	0	2	0	1	0	0	1	0	0	2	0	0	0	1	1	1	0	1	1	0	1	1	1	1	0	0
293	0	2	0	0	0	0	0	0	0	1	0	1	0	0	0	0	0	0	1	0	1	0	0	0	1	0	0	0	0	0	0	0	1	0	0	0	0	2	1	0	0	1	0	1	1	1	2	0	0
295	1	1	0	0	2	0	0	0	0	0	1	0	0	0	0	1	1	1	0	0	0	0	0	0	1	0	0	0	0	0	0	2	2	2	1	1	0	1	0	1	1	0	0	1	0	1	1	0	0
296	1	0	1	1	2	0	0	0	0	1	0	1	0	0	0	1	0	0	1	0	1	0	1	1	1	0	0	0	0	0	0	0	2	2	1	1	0	0	0	1	1	0	0	1	1	1	1	0	0
297	0	1	1	1	2	0	0	0	0	1	2	0	1	1	0	0	0	0	1	0	1	0	1	1	0	1	0	0	0	0	1	1	1	0	0	0	0	0	0	1	0	1	0	0	1	1	0	0	2
298	0	1	1	1	1	0	0	0	0	1	2	0	1	1	0	1	0	0	1	0	1	0	1	1	0	1	0	0	0	0	1	0	1	0	0	0	0	1	0	2	0	1	0	0	1	1	0	0	0
301	0	1	1	1	1	0	0	0	0	1	2	0	2	1	0	1	0	0	1	0	1	0	1	1	0	1	0	0	0	0	1	1	1	0	0	0	0	0	0	1	0	1	0	0	1	1	0	0	1
302	0	1	1	1	1	0	0	0	0	1	2	0	2	1	0	1	0	0	1	0	1	0	1	1	0	1	0	0	0	0	1	1	0	0	0	0	0	0	0	1	0	1	0	0	1	1	0	0	1
303	0	1	1	1	2	0	0	0	0	1	2	0	2	1	0	0	1	1	1	0	1	0	0	0	0	1	0	0	0	0	1	2	1	0	0	0	0	1	0	0	0	2	0	0	0	0	1	0	2
304	0	1	0	0	2	0	0	0	0	1	2	0	1	1	0	0	1	1	1	0	1	0	0	0	0	1	0	0	0	0	1	1	1	0	0	0	0	2	0	1	0	1	0	0	1	1	1	0	1
305	0	1	1	1	2	0	0	0	0	1	2	0	1	1	0	0	1	1	1	0	1	0	0	0	0	1	0	0	0	0	1	1	1	0	0	0	0	2	0	1	0	1	0	0	1	1	1	0	2
307	0	1	0	0	2	0	0	0	0	1	2	0	2	1	0	0	1	1	1	0	1	0	0	0	0	1	0	0	0	0	1	1	1	0	0	0	0	1	0	2	0	1	0	0	1	1	0	0	1
308	0	1	1	1	1	0	0	0	0	1	2	0	2	1	0	0	1	1	1	0	1	0	0	0	0	1	0	0	0	0	1	2	1	0	0	0	0	1	0	0	0	1	0	0	1	1	1	0	1
309	0	1	1	1	2	0	0	0	0	1	2	0	1	1	0	0	1	1	1	0	1	0	0	0	0	1	0	0	0	0	1	1	1	0	0	0	0	2	0	1	0	1	0	0	1	1	1	0	1
344	1	0	1	0	0	2	2	2	0	0	1	0	2	0	0	1	0	0	0	1	0	0	0	0	1	0	0	0	0	0	0	1	2	0	0	0	0	1	0	1	1	1	0	0	1	1	0	0	0
342	1	0	1	1	0	2	2	2	0	0	0	1	1	2	0	0	1	0	0	0	0	0	1	1	1	0	0	0	0	0	0	1	2	0	0	0	0	0	0	1	1	1	0	0	1	1	0	0	1
348	1	0	1	1	0	2	2	2	0	0	1	0	2	0	0	1	0	0	0	1	0	0	0	0	1	0	0	0	0	0	0	1	2	0	0	0	0	0	0	1	1	1	0	0	1	1	0	0	0
357	0	0	2	2	0	1	1	1	1	2	0	1	1	1	0	1	0	0	1	0	1	0	0	0	1	1	0	0	0	0	0	1	2	1	0	0	0	1	1	0	0	1	0	1	1	1	1	0	1
371	1	0	1	1	0	2	2	2	1	1	0	1	1	0	0	1	0	0	1	0	0	0	0	0	1	1	0	0	0	0	0	1	2	1	0	0	0	1	0	0	0	1	0	0	1	1	0	0	1
374	1	1	0	0	2	0	0	0	0	1	1	1	1	1	0	2	1	1	1	1	1	0	1	1	0	1	0	0	0	0	2	1	0	0	0	0	1	1	0	1	0	1	0	1	0	0	2	0	0
347	1	0	1	1	0	2	2	2	0	0	0	1	1	1	0	0	1	0	0	0	0	0	1	1	1	0	0	0	0	0	0	1	2	0	0	0	0	0	0	1	1	1	0	0	1	1	0	0	1
362	0	1	1	0	0	1	1	1	0	2	0	1	1	2	0	2	1	1	0	0	0	0	0	0	2	0	0	0	0	0	0	1	2	0	0	0	0	2	2	0	0	2	1	2	0	0	1	0	0
408	1	1	0	0	0	0	0	0	0	1	1	0	1	0	0	1	0	0	1	0	1	0	1	1	1	0	0	0	0	0	0	0	1	0	0	0	0	0	2	1	1	1	0	1	0	0	1	0	2
330	1	0	0	0	0	0	0	0	0	1	1	1	0	0	0	1	0	0	1	0	1	0	0	0	2	0	1	0	0	1	0	0	0	0	0	0	0	2	0	2	0	1	0	0	0	1	1	0	1
328	0	0	2	2	0	1	1	1	1	2	0	1	1	1	0	1	0	0	2	0	2	0	0	0	1	1	0	0	0	0	0	2	1	1	0	0	0	1	0	0	1	1	0	1	1	1	1	0	0
332	0	2	0	0	2	0	0	0	0	0	1	1	0	2	0	0	1	0	0	0	0	0	0	0	0	2	0	1	1	0	1	0	1	0	0	0	0	2	1	0	1	1	0	1	1	1	0	0	0
385	1	0	2	2	0	1	1	1	0	0	2	2	0	0	0	2	0	0	1	1	1	0	0	0	2	0	0	0	0	0	1	0	0	0	0	0	1	0	0	0	0	2	1	1	0	0	1	0	0
339	0	1	1	1	0	0	0	0	0	1	1	1	1	2	1	2	0	0	1	0	1	0	0	0	1	1	0	1	1	0	0	1	1	0	0	0	0	1	1	1	0	1	0	2	0	0	1	0	0
351	0	0	1	1	0	0	0	0	0	2	1	1	1	2	0	1	1	0	0	0	0	0	0	0	2	0	0	0	0	0	0	0	1	0	0	0	0	1	1	0	0	1	0	2	0	0	2	0	1
372	1	1	0	0	0	1	1	1	1	1	1	1	0	0	0	0	0	0	0	0	1	0	0	0	2	0	0	0	0	0	0	0	1	0	0	0	0	1	0	2	0	2	0	0	0	0	0	0	2
376	0	2	0	0	0	1	1	1	0	2	1	1	0	2	0	1	0	0	0	1	0	0	0	0	0	2	0	1	1	0	1	1	1	0	0	0	0	2	0	2	0	1	0	0	0	1	1	0	0
239	1	0	1	1	2	0	0	0	0	0	0	1	0	0	0	2	1	1	0	0	0	0	0	0	1	0	0	0	0	0	0	1	1	2	1	1	1	0	0	1	1	0	0	0	2	2	1	0	0
365	1	0	1	1	0	2	2	2	1	1	0	1	1	0	0	2	0	0	1	0	1	0	0	0	1	1	0	0	0	0	0	1	2	1	0	0	0	1	0	0	1	1	0	0	1	1	0	0	0
281	1	1	0	0	0	0	0	0	0	2	1	2	0	1	1	1	0	0	1	0	2	1	0	0	1	0	0	0	0	1	0	0	0	0	0	0	0	2	0	0	0	1	0	1	1	1	0	0	0
327	0	0	2	2	0	1	1	1	1	2	0	2	0	1	0	1	0	0	2	0	2	0	0	0	1	1	0	0	0	0	0	2	1	1	0	0	0	1	0	0	1	1	0	1	1	1	1	0	0
299	1	0	1	1	0	0	0	0	0	0	2	0	0	2	0	1	1	1	1	0	1	0	0	0	0	1	0	0	0	0	1	2	2	0	0	0	0	1	0	0	0	1	0	0	1	1	1	0	1
300	1	0	1	1	0	0	0	0	0	0	2	0	1	1	0	0	1	1	1	0	1	0	0	0	0	1	0	0	0	0	1	2	1	0	0	0	0	1	0	0	0	1	0	0	1	1	1	0	2
397	0	0	2	2	0	0	0	0	0	2	1	2	0	1	1	2	0	0	2	0	2	0	1	1	0	1	0	1	1	0	0	1	1	0	0	0	0	0	0	0	0	1	0	0	1	1	0	0	0
368	1	0	1	1	0	1	1	1	0	1	1	2	0	0	0	0	0	0	0	1	0	0	0	0	1	0	0	0	0	0	0	1	1	0	0	0	1	0	0	0	1	0	0	0	2	2	0	0	0
310	0	1	1	1	1	0	0	0	0	1	2	0	2	1	0	1	0	0	1	0	1	0	1	1	0	1	0	0	0	0	1	0	1	0	0	0	0	1	0	2	0	1	0	0	1	1	0	0	1
359	1	1	0	0	0	2	2	2	0	1	0	1	1	1	0	1	1	1	0	0	0	0	0	0	2	0	0	0	0	0	0	1	2	0	0	0	0	1	1	0	1	2	1	1	0	0	0	0	1
364	1	1	0	0	0	1	1	1	0	2	0	1	1	2	0	1	1	1	0	0	0	0	0	0	2	0	0	0	0	0	0	1	2	0	0	0	0	1	1	0	0	2	1	1	0	0	0	0	1
353	1	1	0	0	0	0	0	0	0	0	0	1	0	1	0	2	1	1	1	0	1	0	1	1	0	1	0	0	0	0	1	1	0	0	0	0	0	2	0	0	0	1	1	1	1	1	0	0	0
355	1	0	1	1	0	0	0	0	0	1	1	0	1	1	0	1	0	0	0	0	0	0	0	0	1	1	0	0	0	0	1	1	2	0	0	0	0	1	1	0	0	1	0	1	1	1	1	0	1
311	0	1	1	1	2	0	0	0	0	1	2	0	1	1	0	0	2	2	1	0	1	0	0	0	0	1	0	0	0	0	1	0	1	0	0	0	0	2	0	1	0	1	0	0	1	1	1	0	2
324	1	1	0	0	0	0	0	0	0	0	0	1	0	0	0	1	0	0	0	0	0	0	1	1	0	1	0	0	0	0	0	1	0	0	0	0	2	0	1	0	2	1	0	0	1	1	0	0	2
394	2	0	1	1	0	1	1	1	0	0	1	0	1	0	0	1	0	0	1	0	1	0	0	0	1	0	0	0	0	0	1	1	0	0	0	0	0	0	0	0	0	1	0	0	1	1	1	0	0
358	0	0	2	2	0	1	1	1	1	2	0	1	1	0	0	2	0	0	1	0	1	0	0	0	1	1	0	0	0	0	0	1	2	1	0	0	0	1	1	0	0	1	0	1	1	1	1	0	0
387	0	2	0	0	0	2	2	2	1	2	1	1	1	1	0	1	0	0	0	1	0	0	0	0	1	1	0	2	2	0	0	1	1	0	0	0	0	2	0	1	0	2	0	0	0	0	0	0	0
361	1	0	1	1	0	2	2	2	1	1	0	1	1	0	0	2	0	0	1	0	1	0	0	0	1	1	0	0	0	0	0	1	2	1	0	0	0	1	0	0	1	1	0	0	1	1	0	0	0
257	0	1	2	2	0	0	0	0	0	1	0	1	1	1	1	2	0	0	2	0	2	1	1	1	0	0	0	0	0	1	0	0	1	1	0	0	0	1	0	1	0	1	1	2	0	0	1	0	0
254	0	0	2	2	0	0	0	0	0	1	1	2	0	0	0	2	0	0	2	0	2	1	1	1	0	0	0	0	0	1	0	0	1	1	0	0	0	1	0	1	0	1	1	2	0	0	1	0	0
352	1	1	0	0	0	0	0	0	0	0	0	1	0	1	0	2	1	1	1	0	1	0	1	1	0	1	0	0	0	0	1	1	0	1	1	1	0	0	0	0	0	1	1	1	1	1	0	0	0
338	1	1	0	0	0	0	0	0	0	1	2	0	1	2	0	0	0	0	1	0	1	0	1	1	1	0	1	0	0	2	1	1	1	0	0	0	0	2	1	0	2	2	0	1	0	0	1	0	0
306	1	0	2	2	0	0	0	0	0	0	2	0	1	2	0	1	0	0	1	0	1	0	1	1	0	1	0	0	0	0	1	0	2	0	0	0	0	1	0	1	1	1	0	0	1	1	0	0	0
326	0	2	0	0	0	1	1	1	1	2	1	0	2	2	0	0	0	0	0	1	0	0	0	0	0	2	0	1	1	0	0	0	1	1	1	1	1	1	0	0	1	1	0	0	1	1	1	0	1
360	1	0	1	1	0	2	2	2	1	1	0	1	1	0	0	2	0	0	1	0	1	0	0	0	1	1	0	0	0	0	0	1	2	1	0	0	0	1	0	0	1	1	0	0	1	1	0	0	0
283	0	1	1	1	0	0	0	0	0	2	2	2	0	1	0	1	0	0	2	0	2	0	0	0	1	0	0	0	0	0	0	0	0	0	0	0	1	1	0	1	0	0	0	1	1	1	1	0	0
333	0	2	0	0	1	0	0	0	0	0	2	1	0	2	0	0	1	0	0	0	0	0	0	0	1	1	1	0	0	1	1	1	0	0	0	0	0	2	1	0	1	1	0	1	1	1	0	0	0
370	0	1	1	1	0	1	1	1	0	1	1	2	0	2	0	1	0	0	2	0	2	0	0	0	1	1	0	0	0	0	0	1	2	1	0	0	0	1	0	0	0	0	0	0	2	2	0	0	0
381	1	1	0	0	0	2	2	2	0	0	0	1	1	2	1	2	0	0	2	0	2	0	1	1	1	0	0	0	0	0	0	0	2	0	0	0	0	1	1	0	0	0	0	1	1	1	0	0	0
363	1	0	1	1	0	2	2	2	1	1	0	1	1	0	0	1	0	0	1	0	1	0	0	0	1	1	0	0	0	0	0	1	2	1	0	0	0	1	0	0	1	1	0	0	1	1	0	0	1
343	0	0	2	2	0	1	1	1	0	1	1	0	2	1	0	0	0	0	0	1	0	0	0	0	1	0	0	0	0	0	0	1	2	0	0	0	0	0	0	1	1	1	0	0	1	1	0	0	1
336	0	1	0	1	0	1	1	1	0	0	2	0	1	1	0	0	0	0	0	1	0	0	0	0	1	0	1	0	0	1	0	2	1	1	1	1	1	0	0	1	1	1	0	0	0	0	0	0	1
379	0	2	0	0	0	1	1	1	1	1	1	0	0	0	0	0	1	1	2	0	2	0	0	0	1	1	0	1	1	0	1	0	1	0	0	0	1	0	0	0	0	2	0	0	0	0	2	0	0
334	0	1	1	1	0	1	1	1	0	0	2	1	0	1	0	0	0	0	0	1	0	0	0	0	1	0	1	0	0	1	0	2	1	0	0	0	0	1	0	1	1	1	0	1	1	1	0	0	0
341	1	0	1	1	1	1	1	1	0	0	0	1	1	1	1	0	0	0	1	0	1	0	0	0	1	1	0	0	0	0	1	1	1	0	0	0	0	1	0	0	1	1	0	1	0	0	0	0	1
345	0	0	2	2	0	1	1	1	0	1	1	0	2	1	0	1	0	0	0	1	0	0	0	0	1	0	0	0	0	0	0	1	2	0	0	0	0	1	1	1	0	1	0	1	1	1	1	0	1
73	1	1	0	0	2	2	2	2	2	1	1	0	1	1	0	2	0	0	1	0	1	1	1	1	0	0	0	0	0	1	0	0	1	0	0	0	2	0	0	1	0	2	0	0	0	0	0	1	0
294	0	1	2	2	0	1	1	1	1	0	0	2	0	1	1	0	0	0	1	0	1	0	0	0	1	0	0	0	0	0	0	1	1	1	1	1	1	0	0	1	0	0	0	1	1	1	0	0	1
204	1	1	0	0	0	1	1	1	1	0	1	0	0	1	1	1	0	0	0	2	0	0	0	0	2	0	0	0	0	0	0	0	1	0	0	0	1	1	0	1	1	1	0	1	1	1	0	0	1
206	1	0	0	0	0	0	0	0	0	0	2	0	0	2	0	0	0	0	0	2	0	0	0	0	2	0	0	0	0	0	0	1	0	0	0	0	0	2	0	0	0	0	0	1	1	1	1	0	0
213	0	2	0	0	1	0	0	0	0	2	2	0	1	0	0	1	0	0	0	0	0	0	0	0	1	1	0	0	0	0	1	1	1	0	0	0	0	1	0	0	0	0	0	0	2	2	0	0	1
435	0	2	0	0	1	0	0	0	0	2	2	0	1	0	0	0	0	0	0	0	0	0	0	0	1	1	0	0	0	0	1	0	0	0	0	0	0	2	0	1	1	0	0	0	2	2	0	0	1
227	1	0	1	1	2	0	0	0	0	1	0	2	0	1	0	0	1	1	1	0	1	0	0	0	1	0	0	0	0	0	1	1	2	1	0	0	1	1	0	1	0	1	1	1	1	1	1	0	1
436	2	0	0	0	1	0	0	0	0	0	1	1	0	0	0	0	1	1	1	0	1	0	0	0	1	0	0	0	0	0	0	2	1	0	0	0	1	1	1	0	1	0	0	0	2	2	2	0	1
437	1	1	0	0	2	0	0	0	0	1	1	1	0	0	0	0	1	1	1	0	1	0	0	0	1	0	0	0	0	0	0	2	1	0	0	0	0	2	0	0	1	1	1	1	1	1	1	0	1
256	1	0	1	1	1	0	0	0	0	1	1	1	0	0	0	0	2	2	1	0	1	0	0	0	0	0	0	0	0	0	0	1	1	0	0	0	1	1	0	0	0	0	0	1	1	1	1	0	0
438	0	1	2	2	0	0	0	0	0	1	0	1	1	2	2	2	0	0	2	0	2	1	1	1	0	0	0	0	0	2	0	0	0	0	0	0	0	1	0	1	0	1	1	2	0	0	1	0	0
266	1	1	0	0	2	0	0	0	0	1	1	1	0	0	0	0	0	0	1	1	1	0	0	0	1	0	0	0	0	0	0	1	1	0	0	0	0	1	0	0	1	0	0	0	2	2	1	0	1
267	1	1	0	0	2	1	1	1	1	2	0	1	0	2	0	2	1	1	0	1	0	0	0	0	1	0	1	0	0	1	0	1	1	1	0	0	0	0	0	0	1	0	0	0	2	2	0	0	0
272	1	1	0	0	0	0	0	0	0	1	1	1	1	2	0	0	1	1	1	0	1	0	0	0	1	0	0	0	0	0	0	1	0	2	2	2	1	0	0	0	2	1	0	1	0	0	2	0	2
443	1	1	0	0	0	0	0	0	0	2	2	0	0	1	0	1	0	0	0	2	0	0	0	0	2	0	1	0	0	2	0	1	1	0	0	0	0	1	0	0	2	1	0	0	1	1	0	0	0
444	0	1	1	1	0	0	0	0	0	2	1	1	1	1	1	1	0	0	2	0	2	1	0	0	1	0	1	0	0	2	0	2	0	0	0	0	0	2	0	1	0	1	1	1	0	1	1	0	0
292	0	2	0	0	0	0	0	0	0	2	1	0	0	0	0	1	0	0	1	1	1	0	1	1	1	0	0	0	0	0	1	0	0	1	0	0	0	1	1	0	2	0	0	0	2	2	0	0	1
314	0	1	1	1	2	0	0	0	0	1	2	0	1	1	0	1	0	0	1	0	1	0	1	1	0	1	0	0	0	0	1	0	1	0	0	0	0	1	0	2	0	1	0	0	1	1	0	0	0
445	1	1	1	1	0	0	0	0	0	0	2	0	1	2	0	1	0	0	1	0	1	0	1	1	0	1	0	0	0	0	1	1	2	0	0	0	0	0	0	0	0	0	0	0	2	2	0	0	2
312	1	0	1	1	0	0	0	0	0	1	2	0	2	1	0	0	1	1	1	0	1	0	0	0	0	1	0	0	0	0	1	2	1	0	0	0	0	1	0	0	0	1	0	0	1	1	1	0	2
194	1	0	1	1	0	0	0	0	0	0	1	1	0	0	0	0	0	0	2	0	2	0	1	1	1	0	0	0	0	0	0	0	2	0	0	0	1	0	1	1	1	1	0	1	0	0	2	0	2
200	0	0	2	2	0	0	0	0	0	2	1	1	1	1	0	1	0	0	1	0	1	0	0	0	2	0	1	0	0	1	0	1	1	0	0	0	0	2	1	1	0	1	0	1	0	1	2	0	0
201	0	1	1	1	0	0	0	0	0	1	2	0	0	0	0	0	0	0	1	1	1	0	0	0	2	0	0	0	0	0	0	0	1	1	0	0	1	0	0	0	1	0	0	0	2	2	1	0	2
325	0	1	1	1	0	1	1	1	1	2	1	0	2	2	0	1	1	1	2	0	2	0	0	0	2	0	0	0	0	0	0	2	1	0	0	0	1	1	0	1	1	2	0	1	0	0	2	0	0
329	0	2	0	0	0	1	1	1	0	2	0	1	1	2	0	1	1	1	1	0	1	0	0	0	2	0	0	0	0	0	0	1	1	0	0	0	0	2	1	0	0	2	1	1	0	0	1	0	1
615	0	2	0	0	1	0	1	1	0	2	1	2	0	2	0	2	0	0	2	0	2	0	2	2	0	0	0	0	0	0	2	2	1	0	0	0	1	0	0	0	0	2	0	2	0	0	0	2	0
575	0	2	0	0	2	0	0	0	0	1	2	1	1	1	0	2	2	2	1	0	1	0	0	0	0	2	0	0	0	0	1	0	0	0	0	0	1	0	0	1	0	2	0	0	0	0	0	2	0
582	0	2	0	0	1	2	2	2	1	0	0	0	2	2	0	1	0	0	0	1	0	0	2	2	0	0	0	0	0	1	1	0	1	0	0	0	1	0	0	1	0	1	0	0	1	1	1	0	0
83	1	0	1	1	2	1	1	1	1	0	1	1	1	1	1	2	0	0	1	1	1	1	0	0	0	1	0	1	1	1	0	0	0	0	0	0	0	2	0	2	0	1	1	2	0	0	0	1	0
704	1	1	0	0	2	0	0	0	0	0	1	1	1	2	1	2	0	0	1	0	1	1	0	0	0	1	0	0	0	1	1	0	0	0	0	0	1	1	0	1	0	1	0	1	0	0	0	2	0
705	0	2	2	2	2	1	1	1	1	1	1	1	1	2	2	2	2	2	1	1	1	0	0	0	0	2	0	0	0	0	0	0	0	0	0	0	1	1	0	2	0	2	0	0	1	1	0	1	0
706	1	1	0	0	2	0	0	0	0	1	1	1	1	0	0	2	1	1	1	1	1	1	0	0	0	1	0	0	0	1	0	0	0	0	0	0	1	1	0	2	0	2	1	1	0	0	0	1	0
697	0	2	0	0	2	1	1	1	0	1	0	1	1	2	0	2	0	0	1	1	1	0	2	2	0	0	0	0	0	1	2	1	2	0	0	0	1	0	0	1	0	1	0	1	1	1	0	1	0
709	1	1	0	0	2	0	0	0	0	1	0	0	2	1	0	2	0	0	1	0	1	1	0	0	0	1	0	0	0	1	1	0	1	0	0	0	0	2	0	2	0	0	0	1	1	1	0	1	0
692	1	1	0	0	0	0	0	0	0	1	1	1	1	0	0	2	1	1	2	0	2	1	0	0	0	1	0	0	0	1	0	0	0	0	0	0	1	1	0	2	0	1	0	1	0	0	0	2	0
711	0	1	2	2	2	1	1	1	1	1	1	1	1	1	0	2	0	0	0	1	0	0	0	0	0	2	0	1	1	0	1	0	0	0	0	0	0	2	0	2	0	1	1	1	1	1	0	0	0
712	0	2	0	0	0	0	0	0	0	2	0	2	0	1	0	0	0	0	2	0	2	0	0	0	2	0	0	0	0	0	0	0	0	0	0	0	1	1	0	0	0	1	0	1	1	1	1	0	1
713	1	1	0	0	2	0	0	0	0	1	0	1	1	1	0	2	0	0	1	0	1	1	0	0	0	1	0	0	0	1	1	0	1	0	0	0	0	2	0	2	0	0	0	1	1	1	0	1	0
335	0	1	1	1	0	1	1	1	0	0	2	0	1	1	0	0	0	0	0	1	0	0	0	0	1	0	1	0	0	1	0	2	1	0	0	0	0	1	0	1	1	1	0	1	1	1	0	0	0
340	1	1	0	0	0	1	1	1	0	0	1	1	1	1	1	0	0	0	1	0	1	0	0	0	1	1	0	0	0	0	0	1	1	0	0	0	0	0	0	1	1	1	0	1	0	0	0	0	0
346	1	0	1	1	0	2	2	2	0	0	0	1	1	1	0	1	1	0	0	0	0	0	1	1	1	0	0	0	0	0	0	1	2	0	0	0	0	1	1	1	1	1	0	0	1	1	0	0	0
380	0	2	0	0	0	2	2	2	1	1	0	1	1	2	0	1	0	0	0	0	0	0	1	1	0	1	0	1	1	0	0	1	0	0	0	0	1	1	0	1	0	2	0	0	0	0	1	0	0
382	1	0	1	1	0	0	0	0	0	0	2	1	0	1	0	2	1	1	0	1	0	0	0	0	2	0	0	0	0	0	0	1	2	0	0	0	1	0	0	1	0	0	0	0	2	2	0	0	0
383	0	2	0	0	0	0	0	0	0	1	2	1	1	2	0	1	0	0	1	1	1	0	1	1	1	0	0	1	1	0	0	1	0	0	0	0	0	1	0	1	0	1	1	1	0	1	1	0	0
428	1	1	0	0	0	0	0	0	0	0	0	2	0	0	0	0	0	0	2	0	2	0	0	0	0	0	0	0	0	1	0	1	0	0	0	0	0	2	0	1	0	2	0	0	0	0	0	0	0
386	0	1	1	1	0	0	0	0	0	0	1	2	0	2	1	1	0	0	2	0	2	0	1	1	0	1	0	1	1	0	0	2	0	0	0	0	0	1	0	0	0	1	1	2	0	0	0	0	0
388	0	2	0	0	0	0	0	0	0	1	1	0	1	0	0	1	0	0	1	0	1	0	0	0	0	0	0	0	0	0	0	0	2	0	0	0	0	0	2	2	0	0	0	2	0	0	2	0	2
389	0	1	1	1	1	0	0	0	0	1	1	2	0	1	0	1	0	0	2	0	2	0	1	1	1	0	0	0	0	0	1	1	0	0	0	0	0	1	1	0	2	1	0	1	0	0	1	0	2
391	1	0	0	0	1	1	1	1	0	1	1	1	0	0	0	2	0	0	0	0	0	0	1	1	1	0	0	0	0	0	0	1	0	0	0	0	0	1	0	1	0	1	0	0	1	1	1	0	0
392	0	0	1	1	2	1	2	1	0	0	1	0	2	0	0	1	0	0	2	0	2	0	1	1	1	0	0	0	0	0	0	0	0	2	1	1	1	0	0	2	0	0	0	0	0	2	2	0	0
393	0	0	1	1	1	1	1	1	0	0	1	1	0	1	0	2	1	1	0	1	0	0	0	0	1	1	0	1	1	0	0	2	0	1	0	0	1	0	0	0	1	1	0	1	0	0	1	0	1
395	1	0	1	1	1	1	1	1	1	1	1	1	0	1	1	2	0	0	1	0	1	0	1	1	0	0	0	0	0	0	0	2	0	0	0	0	1	0	0	1	0	2	0	0	0	0	0	0	0
396	1	1	0	0	1	2	2	2	2	1	0	0	0	2	1	1	0	0	1	0	1	0	0	0	2	0	0	0	0	0	0	1	0	1	0	0	0	1	0	2	1	0	0	2	0	0	0	0	0
398	0	1	1	1	0	1	1	1	1	1	1	2	0	2	2	2	0	0	2	0	2	1	1	1	0	0	0	0	0	1	0	2	0	0	0	0	1	0	0	1	0	1	0	1	0	0	0	0	0
399	0	1	1	1	0	0	0	0	0	2	0	1	0	1	1	0	0	0	2	0	2	1	1	1	0	0	0	0	0	1	0	1	0	0	0	0	0	1	0	1	0	1	1	2	0	0	0	0	0
400	0	1	1	1	0	0	0	0	0	2	2	1	1	1	1	2	0	0	1	0	1	0	1	1	0	1	0	0	0	0	1	2	1	0	0	0	1	0	0	1	0	2	1	1	0	0	1	0	0
401	0	0	0	0	0	0	2	2	0	1	2	1	1	1	0	2	0	0	0	2	0	0	0	0	0	2	0	0	0	1	2	1	2	0	0	0	1	0	0	0	0	1	0	1	0	0	0	2	0
373	0	1	0	0	1	1	2	2	1	1	1	0	1	1	0	2	0	0	1	1	1	1	1	1	0	1	0	0	0	1	1	0	1	0	0	0	1	1	0	0	0	1	0	0	1	1	1	1	0
402	0	1	1	1	2	2	2	2	2	0	0	0	1	1	0	2	0	0	2	0	2	1	1	1	0	0	0	0	0	1	1	0	1	0	0	0	0	1	0	0	0	0	0	1	1	1	1	0	0
403	1	1	0	0	2	1	1	1	1	1	1	1	1	0	0	0	1	1	2	0	1	1	0	0	0	1	0	0	1	1	0	1	1	0	0	0	1	0	0	0	0	0	0	2	0	0	0	0	0
404	0	1	1	1	1	1	1	1	0	1	2	1	0	2	2	2	0	0	0	2	0	0	1	1	0	1	0	0	0	1	2	2	0	0	0	0	1	0	0	0	0	1	0	1	0	0	0	2	0
405	0	1	1	1	0	0	1	1	0	2	2	1	1	2	1	2	0	0	1	1	1	0	0	0	2	0	0	0	0	0	0	0	0	0	0	0	0	2	0	1	0	2	0	1	0	0	0	1	0
406	0	0	2	2	0	1	2	2	1	0	0	1	1	2	0	0	0	0	2	0	2	0	1	1	1	0	0	0	0	0	1	1	0	0	0	0	1	1	0	0	1	1	0	1	0	1	1	0	0
407	0	1	1	1	0	0	0	0	0	2	1	1	1	1	1	2	0	0	2	0	2	0	0	0	0	1	0	0	0	0	0	1	0	0	0	0	1	1	0	2	0	0	0	2	0	0	1	0	0
418	1	1	0	0	2	1	1	1	0	1	2	2	0	2	0	1	0	0	1	0	1	0	1	1	0	0	0	0	0	1	1	1	1	0	0	0	0	1	0	1	0	2	0	0	0	0	1	1	0
429	1	0	0	0	0	1	1	1	1	1	2	1	1	1	1	1	1	1	0	0	0	0	1	1	0	0	0	0	0	0	0	1	1	1	1	1	1	1	0	1	0	0	0	1	1	1	1	0	1
419	0	1	0	0	2	0	0	0	0	1	1	2	0	2	0	0	0	0	1	0	1	0	1	1	0	0	0	0	0	0	1	2	1	0	0	0	0	0	1	1	1	1	0	1	0	0	1	0	1
430	0	1	1	1	0	1	1	1	1	0	0	1	1	1	0	0	0	0	1	0	1	0	2	2	0	0	0	0	0	1	1	0	2	0	0	0	0	1	0	1	0	0	0	0	2	2	1	0	0
431	1	1	1	1	0	2	2	2	2	1	0	1	1	2	0	0	0	0	0	2	0	0	0	0	2	0	0	0	0	0	0	1	0	0	0	0	0	2	0	0	0	0	0	1	1	1	0	0	2
420	1	1	0	0	0	0	0	0	0	2	1	2	0	2	0	0	0	0	1	0	1	0	0	0	0	1	0	1	1	0	0	1	2	0	0	0	0	0	0	1	0	1	0	0	1	1	2	0	0
421	0	1	1	1	0	1	1	1	1	1	1	1	1	1	0	1	1	1	0	0	0	0	1	1	0	0	0	0	0	0	0	2	2	0	0	0	0	1	0	0	0	0	0	0	2	2	0	1	0
432	0	2	0	0	0	0	0	0	0	1	1	0	1	0	0	0	0	0	1	0	1	0	0	0	1	0	0	0	0	0	0	2	1	1	0	0	0	1	0	0	0	1	0	0	1	1	1	0	0
433	1	1	0	0	0	1	1	1	1	1	1	1	1	2	1	0	0	0	0	0	0	0	1	1	0	0	0	0	0	0	0	2	2	1	1	1	0	1	0	2	0	0	0	0	2	2	1	0	0
434	1	1	0	0	2	1	1	1	0	1	1	1	1	1	0	0	2	2	1	0	1	0	0	0	0	2	0	1	1	0	0	1	1	1	1	1	1	1	0	1	1	0	0	0	1	2	2	0	0
422	1	1	0	0	2	0	0	0	0	1	1	0	1	0	0	2	1	1	1	0	0	0	2	2	0	0	0	0	0	1	1	2	1	1	1	1	1	0	0	0	1	0	0	1	1	1	1	0	0
423	0	0	2	2	1	1	1	1	0	1	1	2	0	2	1	0	0	0	1	1	1	0	0	0	1	1	0	0	0	0	1	1	0	0	0	0	1	0	0	1	0	1	0	1	0	0	0	0	0
424	2	0	0	0	0	0	0	0	0	1	0	0	0	1	0	1	0	0	1	0	1	0	0	0	1	1	0	0	0	0	1	0	1	1	0	0	0	0	1	1	0	0	0	0	1	1	0	0	0
426	0	2	0	0	0	1	1	1	1	0	2	1	0	2	0	1	0	0	1	0	1	0	0	0	0	2	0	0	0	0	2	0	1	1	0	0	0	0	0	0	0	0	0	0	2	2	0	0	0
56	1	1	0	0	0	1	1	1	0	2	0	1	1	1	1	0	0	0	0	1	0	0	2	2	0	0	0	0	0	0	1	2	0	0	0	0	1	1	1	1	1	2	0	0	0	0	1	0	0
217	0	2	0	0	1	0	0	0	0	1	1	0	2	0	0	0	0	0	0	0	0	0	0	0	1	1	0	0	0	0	1	0	1	0	0	0	1	0	0	0	1	0	0	0	2	2	0	0	1
439	1	1	0	0	2	0	0	0	0	1	1	1	0	0	0	0	0	0	2	0	2	0	0	0	1	0	0	0	0	0	0	1	1	0	0	0	0	1	0	0	1	0	0	0	2	2	1	1	0
440	0	2	0	0	2	1	1	1	0	1	1	1	0	0	0	0	0	0	0	0	0	0	0	0	0	0	0	0	0	0	0	1	0	0	0	0	0	0	0	0	2	0	0	0	2	2	0	0	0
441	1	1	0	0	1	1	1	1	0	0	1	1	0	0	0	0	0	0	0	1	0	0	0	0	1	0	0	0	0	0	0	1	1	0	0	0	1	1	0	0	1	1	0	1	1	1	0	0	0
442	2	0	0	0	1	0	0	0	0	0	0	1	1	0	0	0	0	0	2	0	2	0	0	0	0	0	0	0	0	0	0	1	1	0	0	0	0	1	0	0	1	0	0	0	2	2	1	0	0
356	1	0	1	1	0	0	0	0	0	1	1	0	1	1	0	0	0	0	0	0	0	0	0	0	2	0	0	0	0	0	0	0	2	0	0	0	0	1	0	0	1	1	0	1	1	1	1	0	2
369	1	1	0	0	0	2	2	2	0	1	0	1	1	0	0	1	0	0	0	0	0	0	0	0	2	0	0	0	0	0	0	1	2	0	0	0	0	1	1	0	1	2	1	1	0	0	0	0	1
354	2	0	0	0	0	1	1	1	0	0	1	0	1	1	0	2	0	0	0	0	0	0	0	0	1	1	0	0	0	0	1	1	2	0	0	0	0	2	1	0	0	1	0	0	1	1	0	0	0
495	0	2	0	0	2	1	1	1	1	0	0	1	1	0	0	1	1	1	1	0	1	0	0	0	1	1	0	0	0	0	1	1	0	0	0	0	1	1	0	0	0	0	0	0	1	2	2	0	0
499	0	2	0	0	2	1	1	1	1	1	1	0	2	0	0	1	2	2	2	0	2	0	0	0	0	2	0	0	0	0	2	0	2	0	0	0	1	0	0	0	0	1	0	0	1	1	1	1	0
516	0	1	1	1	2	0	0	0	0	1	2	0	2	0	0	0	0	0	2	0	2	0	1	1	0	0	0	0	0	1	1	0	1	0	0	0	1	0	0	1	0	2	0	0	0	0	1	1	0
518	1	1	0	0	2	0	0	0	0	1	1	0	2	1	0	2	0	0	1	0	0	0	1	1	1	0	0	0	0	0	0	0	0	0	0	0	1	0	0	2	0	1	0	2	0	0	1	1	0
519	1	1	0	0	0	2	2	2	1	1	2	0	2	1	0	1	0	0	1	0	1	0	1	1	1	0	0	0	0	0	0	0	1	0	0	0	1	0	0	1	0	1	0	1	0	0	0	2	0
523	0	1	1	1	2	0	0	0	0	1	0	1	1	2	0	0	0	0	2	0	2	0	0	0	1	0	0	0	0	0	0	1	1	0	0	0	1	0	0	1	0	0	0	0	2	2	1	0	1
525	1	1	0	0	0	1	1	1	0	1	1	1	0	2	2	2	0	0	0	2	0	0	0	0	0	1	0	0	0	0	1	0	1	0	0	0	1	0	0	1	0	2	0	1	0	0	0	0	0
528	1	0	1	1	2	0	0	0	0	0	0	0	1	0	0	2	1	1	1	0	1	0	1	1	0	0	0	0	0	0	0	1	1	1	0	0	0	1	0	1	0	0	0	1	1	1	1	0	0
532	1	0	2	2	1	0	0	0	0	2	2	1	1	2	0	0	0	0	0	1	0	0	0	0	0	1	0	0	0	0	1	0	1	0	0	0	1	1	0	2	0	1	0	1	1	1	0	0	0
535	1	0	0	0	0	0	0	0	0	2	2	1	0	1	1	1	0	0	2	0	2	2	0	0	0	0	0	0	0	1	0	1	0	0	0	0	0	1	0	0	0	1	1	1	1	1	0	0	0
539	0	1	1	1	0	1	1	1	1	1	1	1	0	1	1	2	0	0	0	2	0	0	0	0	0	1	0	1	1	0	0	0	0	0	0	0	1	0	0	0	0	0	0	1	1	1	1	0	0
540	0	2	0	0	0	0	0	0	0	2	2	2	0	2	2	1	0	0	2	0	2	0	0	0	1	1	0	1	1	0	0	1	0	0	0	0	0	2	0	0	0	2	1	1	0	0	1	0	0
542	0	2	0	0	0	0	0	0	0	2	1	0	1	1	0	0	0	0	0	0	0	0	0	0	1	1	0	0	0	0	1	1	0	0	0	0	1	0	0	1	2	1	0	1	1	1	0	0	2
555	1	0	1	1	0	0	0	0	0	2	1	2	0	0	0	1	0	0	1	1	1	0	0	0	2	0	0	0	0	0	0	0	1	0	0	0	0	0	0	0	2	1	0	0	0	1	1	0	0
556	1	0	2	2	0	0	0	0	0	0	1	0	1	0	0	0	0	0	1	0	1	0	0	0	2	0	0	0	0	0	0	0	2	0	0	0	0	1	0	1	0	1	0	2	0	0	0	0	0
557	0	2	0	0	0	1	1	1	0	2	2	2	0	0	0	2	0	0	1	1	1	0	1	1	0	0	0	0	0	0	1	0	1	1	1	1	1	0	0	1	0	2	0	0	0	0	1	0	1
558	1	1	0	0	0	0	0	0	0	2	1	1	0	2	0	0	0	0	1	0	1	0	0	0	2	0	0	0	0	0	0	0	0	1	0	0	0	2	1	0	2	2	0	1	0	0	1	0	0
559	2	0	0	0	0	0	0	0	0	0	0	0	1	2	0	0	0	0	1	0	1	0	0	0	2	0	0	0	0	0	0	1	0	0	0	0	0	1	0	0	1	1	0	0	1	1	0	0	1
563	1	0	0	0	1	0	0	0	0	1	1	0	0	0	0	0	0	0	0	0	0	0	0	0	2	0	0	0	0	0	0	0	2	0	0	0	1	0	0	0	2	1	0	0	1	1	1	0	1
564	2	0	0	0	0	0	2	2	0	2	2	2	0	2	0	0	2	0	2	2	0	0	0	0	0	0	0	0	0	1	0	1	0	0	0	0	0	0	0	0	0	2	0	2	0	0	2	0	0
566	1	1	0	0	0	0	0	0	0	2	0	2	0	0	0	0	0	0	1	0	1	0	0	0	2	0	0	0	0	0	0	0	1	0	0	0	1	1	0	0	0	1	0	1	1	1	0	0	0
567	0	2	0	0	1	1	1	1	1	2	2	0	1	1	0	0	0	0	0	1	0	0	0	0	0	2	0	1	1	0	1	1	2	0	0	0	0	2	0	0	2	1	0	1	0	1	2	0	0
568	0	1	0	1	1	1	1	1	1	0	0	0	2	1	0	1	0	0	2	0	2	0	1	1	1	0	0	0	0	1	1	0	2	0	0	0	2	0	0	1	0	0	0	0	1	2	0	0	0
569	0	2	0	0	2	1	1	1	1	0	1	0	0	1	0	1	0	0	2	0	2	0	0	0	2	0	0	0	0	1	2	0	0	0	0	0	2	0	0	0	0	1	0	0	1	1	1	1	0
570	0	1	0	1	1	0	0	0	0	2	1	0	2	0	0	1	2	2	2	0	2	0	0	0	1	1	0	0	0	0	1	0	0	0	0	0	1	0	0	2	0	0	0	2	0	0	0	0	0
571	1	1	0	0	2	0	0	0	0	1	2	0	2	1	0	1	0	0	1	1	1	0	0	0	1	1	0	0	0	0	1	1	1	0	0	0	1	1	0	1	0	0	0	0	2	2	1	1	0
572	0	2	0	0	2	0	0	0	0	0	1	0	2	1	0	2	1	1	2	0	2	0	0	0	1	1	0	0	0	0	2	0	2	0	0	0	0	2	0	2	0	1	0	0	1	2	0	1	0
573	0	1	0	0	2	0	0	0	0	2	2	0	1	2	0	2	0	0	1	1	1	0	2	2	0	0	0	0	0	1	1	2	2	0	0	0	1	0	0	0	0	1	0	0	0	0	1	0	0
574	0	2	0	0	1	1	1	1	1	0	2	0	1	1	0	2	0	0	1	1	1	0	1	1	0	0	0	0	0	0	0	1	1	0	0	0	1	1	0	0	0	1	0	0	0	1	1	0	0
576	0	2	0	0	2	0	0	0	0	2	2	0	2	1	0	2	1	1	2	0	2	0	0	0	0	2	0	0	0	0	2	0	1	0	0	0	1	1	0	1	0	0	0	1	0	1	2	0	0
577	0	2	0	0	1	0	0	0	0	1	1	1	1	1	0	2	0	0	0	0	0	0	0	0	2	0	0	0	0	0	1	1	0	1	1	1	2	0	0	0	0	0	0	0	0	0	0	0	0
578	0	2	0	0	0	2	2	2	2	2	2	2	0	1	0	0	1	1	1	1	1	0	0	0	1	0	0	1	1	0	0	1	0	0	0	0	1	1	0	1	2	1	0	0	0	1	2	0	0
579	1	1	0	0	0	2	2	2	1	1	1	1	0	1	0	1	0	0	2	0	2	0	1	1	1	0	0	0	0	0	0	0	1	0	0	0	1	1	0	1	0	0	0	0	0	2	2	0	0
583	0	2	0	0	0	2	2	2	2	1	1	0	2	0	0	2	1	1	1	0	1	0	1	1	0	1	0	0	0	0	0	0	0	0	0	0	1	0	0	1	0	2	0	0	0	0	2	0	0
585	0	2	0	0	1	0	0	0	0	1	1	0	2	2	0	2	0	0	0	2	0	0	0	0	0	2	0	0	0	0	2	0	2	0	0	0	0	2	0	2	0	0	0	0	1	2	2	0	0
586	0	2	0	0	2	1	1	1	1	0	1	0	0	1	0	2	0	0	1	1	1	0	0	0	0	2	0	0	0	0	2	0	1	0	0	0	0	2	0	2	0	1	0	0	0	1	2	0	0
587	1	1	0	0	0	1	1	1	1	1	1	0	2	2	0	0	0	0	2	0	2	0	0	0	1	1	0	0	0	0	2	0	1	0	0	0	1	1	0	0	0	0	0	0	2	2	2	0	0
588	0	2	0	0	1	1	1	1	0	2	1	0	1	1	0	0	1	1	1	1	1	0	1	1	1	0	0	0	0	1	1	0	1	1	1	1	1	1	0	1	0	1	0	0	1	1	0	0	0
589	1	1	0	0	0	2	2	2	1	0	1	1	1	2	0	2	0	0	1	0	1	0	1	1	0	1	0	0	0	1	2	0	2	0	0	0	1	0	0	0	0	1	0	2	0	0	1	0	0
591	0	2	1	1	1	2	2	2	1	1	1	1	1	0	0	2	1	1	2	0	2	0	0	0	0	2	0	0	0	0	2	0	2	0	0	0	1	0	0	1	0	1	0	0	0	1	1	0	0
592	1	1	0	0	0	2	2	2	0	0	2	0	0	1	0	1	2	2	2	0	2	0	0	0	0	2	0	0	0	0	2	0	2	0	0	0	1	1	0	0	0	1	0	0	0	1	1	1	0
593	0	2	0	0	0	2	2	2	2	1	0	0	1	2	0	1	0	0	2	0	2	0	0	0	2	0	0	0	0	0	0	0	0	0	0	0	1	0	0	0	0	0	0	0	1	2	2	0	0
594	0	2	0	0	2	0	0	0	0	0	1	0	2	1	0	2	2	2	2	0	2	0	0	0	1	1	0	0	0	0	1	0	1	0	0	0	1	0	0	1	0	2	0	1	0	0	1	1	0
595	0	2	0	0	1	1	1	1	1	2	2	0	1	2	0	2	1	1	2	0	2	0	0	0	0	2	0	0	0	0	0	0	1	0	0	0	0	1	0	0	0	1	0	0	0	1	2	0	0
597	0	2	0	0	1	2	2	2	2	0	0	1	1	1	0	0	1	1	1	1	1	0	0	0	1	1	0	0	0	0	0	1	1	0	0	0	1	0	0	2	0	1	0	0	0	1	0	0	0
599	0	2	0	0	2	1	1	1	1	1	1	0	2	0	0	2	0	0	1	1	1	0	0	0	1	1	0	1	1	0	1	0	1	0	0	0	1	0	0	1	0	1	0	0	1	1	0	0	0
601	0	1	0	0	0	2	2	2	0	2	2	0	1	1	0	1	0	0	1	1	1	0	0	0	1	1	0	1	1	0	1	1	0	0	0	0	1	0	0	1	1	1	0	0	1	1	0	0	0
602	0	1	1	1	0	1	1	1	1	2	1	2	0	0	0	1	1	1	1	0	0	0	1	1	1	0	1	0	0	1	1	0	0	0	0	0	0	0	0	1	0	2	1	1	0	0	0	0	0
604	2	0	0	0	1	2	2	2	2	1	2	2	0	2	0	0	1	2	0	2	0	0	0	0	0	2	0	0	0	0	2	0	0	0	0	0	0	2	0	1	0	1	0	1	0	0	1	0	0
607	0	2	0	0	2	2	1	2	0	2	2	0	2	1	0	0	0	0	1	1	1	0	2	2	0	0	0	0	0	0	1	2	1	0	0	0	1	0	0	1	1	2	0	1	0	0	1	0	0
608	0	1	0	0	0	1	1	1	0	1	2	0	2	1	0	2	0	0	1	1	1	0	0	0	1	1	0	0	0	1	1	2	0	0	0	0	1	0	0	1	0	2	0	0	0	0	1	1	0
611	0	1	0	0	1	2	2	2	0	2	2	1	0	1	0	1	1	1	1	1	1	0	0	0	1	1	0	1	1	0	0	0	0	0	0	0	2	0	0	1	0	0	0	1	1	1	2	0	0
612	1	0	1	1	2	0	0	0	0	2	2	1	1	1	0	0	0	0	1	0	1	0	1	1	0	1	0	0	0	0	1	0	0	0	0	0	1	0	0	2	0	0	0	1	1	1	1	1	0
613	1	0	1	1	2	0	0	0	0	2	2	1	1	1	0	1	0	0	1	0	1	0	1	1	0	1	0	0	0	0	1	0	0	0	0	0	2	0	0	1	0	0	0	1	1	1	1	0	0
616	0	2	0	0	2	1	1	1	1	1	1	0	2	1	0	1	2	2	2	0	2	0	0	0	0	2	0	0	0	0	2	2	0	0	0	0	1	1	0	1	0	1	0	0	1	1	1	0	0
617	0	2	0	0	1	2	2	2	2	1	1	1	1	1	0	2	1	1	0	1	0	0	0	0	2	0	0	1	1	0	0	1	1	0	0	0	1	0	0	0	0	1	0	0	0	1	2	0	0
619	0	2	0	0	2	1	1	2	1	0	0	1	1	1	0	1	1	1	0	0	0	0	1	1	0	1	0	0	0	0	1	0	1	0	0	0	0	2	0	0	0	2	0	0	0	0	2	0	0
620	0	2	0	0	2	2	2	2	2	1	1	1	1	1	0	1	0	0	0	1	0	0	0	0	1	1	0	0	0	0	0	1	1	0	0	0	0	2	0	0	0	0	0	0	1	2	2	0	0
621	0	2	0	0	2	1	1	1	1	1	0	1	1	1	0	2	1	1	1	0	1	0	0	0	2	0	0	0	0	0	0	2	0	0	0	0	2	0	0	1	0	1	0	0	0	1	1	0	0
622	1	1	0	0	1	0	0	0	0	1	2	0	0	1	1	1	0	0	0	2	0	0	0	0	2	0	0	0	0	0	0	0	2	0	0	0	0	1	0	0	2	1	0	0	1	1	0	1	1
623	0	2	0	0	2	0	0	0	0	2	2	0	0	1	1	0	0	0	1	1	1	0	0	0	2	0	0	0	0	0	0	0	1	0	0	0	0	1	0	0	2	1	0	0	1	1	0	1	1
624	0	2	0	0	0	0	0	0	0	2	2	0	0	0	0	1	0	0	1	1	1	0	0	0	1	1	0	0	0	0	1	0	0	0	0	0	1	1	1	0	2	1	0	1	1	1	1	0	0
625	1	0	0	0	0	0	0	0	0	2	1	0	1	1	0	2	0	0	0	1	0	0	0	0	2	0	0	0	0	0	0	0	1	0	0	0	0	1	1	0	1	2	0	1	0	0	1	1	1
627	0	2	0	0	2	0	0	0	0	2	1	0	0	2	1	2	0	0	0	2	0	0	0	0	2	0	1	0	0	1	0	1	2	0	0	0	0	0	0	0	2	1	0	0	1	1	0	1	1
628	2	0	0	0	0	0	0	0	0	2	2	0	0	0	0	1	0	0	0	2	0	0	0	0	2	0	1	0	0	1	0	1	1	0	0	0	0	0	0	0	1	2	0	0	0	1	1	0	0
629	0	1	1	1	1	1	1	1	1	2	1	1	1	2	1	2	0	0	1	0	1	0	0	0	2	0	0	0	0	0	0	1	1	1	0	0	1	0	1	0	1	1	0	2	0	0	1	0	1
630	0	2	0	0	1	1	1	1	1	2	1	1	0	1	1	1	0	0	1	1	1	0	1	1	1	0	0	0	0	0	1	1	0	1	0	0	1	0	1	0	2	0	0	1	1	1	0	0	1
631	0	1	1	1	0	0	0	0	0	1	2	1	1	2	0	2	1	1	1	1	1	0	1	1	0	1	0	0	0	0	1	1	0	0	0	0	0	2	0	1	0	2	1	1	0	0	0	0	0
635	1	1	0	0	0	2	2	2	2	0	0	2	0	2	0	0	0	0	1	0	1	0	0	0	0	0	0	0	0	0	0	2	0	0	0	0	0	0	0	0	2	1	0	0	1	1	0	0	1
649	1	1	0	0	0	0	0	0	0	0	0	0	1	2	0	0	0	0	0	0	0	0	0	0	0	2	0	0	0	0	2	0	1	1	1	1	0	1	0	2	0	0	0	0	2	2	0	0	0
650	2	0	0	0	0	0	0	0	0	0	0	1	1	1	0	2	0	0	1	0	1	0	1	1	0	0	0	0	0	0	0	0	0	2	1	1	0	1	0	0	0	0	0	0	2	2	2	0	0
651	2	0	0	0	0	0	0	0	0	1	1	0	1	1	0	1	0	0	0	0	0	0	1	1	0	0	0	0	0	0	0	0	0	2	0	0	0	1	0	1	0	0	1	0	2	0	1	0	1
652	2	0	0	0	0	0	0	0	0	1	0	0	1	1	0	2	0	0	1	0	1	0	1	1	0	0	0	0	0	0	0	1	0	2	1	1	0	1	0	1	0	0	0	0	2	2	0	0	0
653	1	0	2	2	1	1	1	1	1	2	2	1	0	1	0	0	0	0	1	0	1	0	0	0	1	1	0	0	0	0	1	1	1	0	0	0	0	0	0	1	0	0	0	0	2	2	1	0	0
654	0	2	0	0	0	0	0	0	0	1	0	0	2	1	0	0	0	0	1	0	1	0	0	0	1	0	0	0	0	0	0	0	0	0	0	0	1	1	0	0	0	2	0	0	0	1	1	0	0
656	0	2	0	0	0	0	0	0	0	2	0	0	2	2	0	1	0	0	1	0	1	0	0	0	2	0	0	0	0	0	0	0	0	0	0	0	0	1	1	0	0	1	0	1	1	1	1	0	1
657	1	1	0	0	2	0	0	0	0	1	0	0	0	0	0	1	0	0	1	0	1	0	1	1	1	0	0	0	0	0	0	1	2	2	1	1	0	1	0	1	1	0	0	1	0	1	1	0	0
660	0	2	0	0	1	1	1	1	0	1	1	1	0	2	0	1	1	1	0	1	0	0	0	0	1	0	1	0	0	1	0	0	1	1	0	0	1	0	0	0	1	0	0	0	2	2	0	0	0
661	1	1	0	0	0	2	2	2	2	1	1	1	0	2	1	2	0	0	1	0	1	0	0	0	1	0	0	1	0	0	0	2	1	0	0	0	0	1	0	1	1	0	0	0	2	2	0	0	0
662	1	0	2	2	0	1	1	1	0	0	1	0	2	1	0	1	1	1	0	0	0	0	0	0	1	0	0	0	0	0	0	1	2	0	0	0	0	0	0	0	2	1	0	0	1	1	0	0	1
663	0	1	1	1	2	0	0	0	0	2	0	0	1	2	2	2	0	0	2	1	1	0	0	0	2	0	0	0	0	0	0	1	1	0	0	0	0	2	1	1	1	1	0	0	0	0	1	0	0
664	1	1	1	1	1	1	1	1	1	0	1	0	1	1	0	1	2	2	2	1	1	0	0	0	1	1	0	0	0	0	1	0	1	1	1	1	0	2	0	1	0	1	0	0	1	1	1	0	0
667	1	1	0	0	0	0	0	0	0	1	2	0	0	1	0	1	0	0	0	2	0	0	0	0	2	0	0	0	0	0	0	0	1	1	0	0	0	1	0	0	2	0	0	0	1	2	0	0	2
670	0	2	0	0	2	0	0	0	0	1	0	1	1	2	0	0	0	0	1	0	1	0	0	0	1	1	0	0	0	0	1	1	0	0	0	0	1	0	0	1	2	0	0	0	2	2	0	0	1
671	0	1	0	0	0	1	1	1	0	2	2	2	0	1	0	0	0	0	1	0	1	0	0	0	1	0	0	0	0	0	0	1	2	0	0	0	0	0	0	1	0	2	0	0	0	0	2	0	1
672	0	1	1	1	2	1	1	1	0	2	2	1	1	0	0	0	0	0	1	0	1	0	0	0	1	1	0	0	0	0	2	0	0	0	0	0	1	0	0	1	0	1	0	0	1	1	0	0	0
673	0	2	0	0	0	1	1	0	0	1	1	1	0	1	0	1	0	0	1	0	2	0	1	1	0	0	0	0	0	0	0	2	0	1	0	0	1	0	0	1	1	0	0	1	1	2	1	0	0
675	1	0	0	0	1	0	0	0	0	2	2	0	2	0	0	0	0	0	2	0	2	0	2	2	0	0	0	0	0	0	2	1	2	0	0	0	0	2	1	0	0	0	0	1	1	1	1	0	0
676	0	2	0	0	1	0	0	0	0	1	1	0	1	1	0	1	0	0	0	0	0	0	0	0	0	2	0	0	0	0	2	1	0	0	0	0	1	0	0	1	1	1	0	0	1	1	0	1	1
677	0	2	0	0	1	1	1	1	1	1	0	0	2	2	0	2	0	0	0	1	0	0	1	1	0	1	0	0	0	1	1	0	1	0	0	0	1	1	0	2	0	0	0	0	2	2	0	0	0
678	0	2	0	0	2	0	0	0	0	1	2	1	0	1	0	1	0	0	0	0	0	0	0	0	1	1	0	0	0	0	1	0	0	0	0	0	1	0	0	2	1	2	0	1	0	0	0	1	1
679	0	2	0	0	1	1	1	1	1	1	0	0	2	2	0	1	0	0	0	0	0	0	1	1	0	1	0	0	0	0	1	0	1	0	0	0	1	1	0	1	0	1	0	0	1	1	1	0	0
680	0	2	0	0	1	1	1	1	1	1	0	0	2	2	0	1	0	0	0	0	0	0	1	1	0	1	0	0	0	0	1	0	1	0	0	0	1	1	0	1	0	1	0	0	1	1	1	0	0
682	0	2	0	0	2	0	0	0	0	2	2	0	1	1	0	1	1	1	1	0	1	0	0	0	0	2	0	1	1	0	0	1	1	0	0	0	1	1	0	1	1	2	0	1	0	0	1	1	0
683	0	2	0	0	0	1	1	1	1	2	2	1	1	0	0	1	1	1	1	1	1	0	0	0	0	2	0	0	0	0	1	0	1	0	0	0	1	1	0	1	1	2	0	1	0	0	1	1	0
684	0	1	1	1	1	2	2	2	2	0	1	0	2	1	1	2	0	0	1	0	1	1	1	1	0	0	0	0	0	1	0	0	0	0	0	0	1	1	0	2	0	2	0	0	0	0	1	1	0
685	0	1	0	0	0	1	1	1	0	1	1	0	2	1	0	2	0	0	1	0	1	0	1	1	0	1	0	0	0	2	2	1	0	0	0	0	1	0	0	2	0	2	0	0	0	0	2	0	0
686	1	0	1	1	0	0	0	0	0	1	1	1	1	1	0	0	0	0	1	0	1	1	0	0	0	0	0	0	0	1	0	0	0	0	0	0	1	1	0	2	0	0	0	1	1	1	0	1	0
688	1	1	0	0	0	0	1	1	0	1	1	2	0	0	0	0	0	0	0	1	0	0	2	2	0	0	0	0	0	0	1	0	0	1	1	1	1	0	0	1	0	0	0	1	1	1	2	0	0
689	1	1	0	0	2	0	0	0	0	1	1	1	0	1	0	0	0	0	1	0	1	1	0	0	0	1	0	1	1	1	0	1	1	0	0	0	0	2	0	1	1	0	0	1	0	1	1	1	0
691	0	2	0	0	2	0	0	0	0	1	1	2	0	2	0	1	0	0	1	0	1	0	0	0	1	1	0	0	0	0	1	0	0	0	0	0	1	0	0	0	0	1	0	0	1	1	1	1	1
695	0	2	0	0	2	0	0	0	0	1	1	2	0	2	0	2	0	0	0	0	0	0	0	0	0	2	0	0	0	0	2	0	1	0	0	0	1	1	0	1	0	2	0	0	0	0	0	1	0
696	1	1	0	0	2	0	0	0	0	0	1	2	0	1	0	2	0	0	1	0	1	1	0	0	0	1	0	0	0	2	0	0	0	0	0	0	1	1	0	1	0	1	0	1	0	0	0	2	0
698	0	1	1	1	2	1	1	1	1	0	2	0	2	2	1	2	0	0	0	1	0	0	0	0	0	2	0	1	1	0	1	0	0	0	0	0	0	1	0	1	0	2	1	1	0	0	0	1	0
703	2	0	0	0	0	0	0	0	0	0	2	0	1	2	0	0	0	0	1	0	1	0	0	0	1	1	0	0	0	0	1	2	1	0	0	0	1	0	0	0	1	0	0	0	1	2	1	0	2
1001	0	2	0	0	2	0	0	0	0	1	1	0	2	1	0	2	1	1	1	0	1	0	0	0	1	1	0	0	0	0	1	0	1	0	0	0	0	1	0	1	0	1	0	0	1	1	0	1	0
716	1	1	0	0	0	1	1	1	1	1	1	1	1	1	1	1	0	0	0	2	0	0	0	0	0	2	0	0	0	0	2	0	2	0	0	0	0	2	0	1	1	2	0	2	0	0	1	0	0
717	0	1	0	0	1	0	0	0	0	2	2	0	2	0	0	1	1	1	2	0	2	0	1	1	0	1	0	0	0	1	2	0	1	0	0	0	1	0	0	2	0	1	0	1	0	0	2	0	0
718	1	1	0	0	1	1	1	1	1	0	1	1	1	1	0	0	0	0	2	0	2	0	1	1	1	0	0	0	0	0	1	0	1	0	0	0	1	0	0	1	0	0	0	0	1	2	0	0	0
719	0	2	0	0	1	1	1	1	0	1	1	1	1	0	0	2	0	0	1	1	1	0	0	0	0	2	0	0	0	0	0	1	2	0	0	0	0	2	0	1	1	0	0	0	1	2	1	1	0
720	0	2	0	0	2	1	1	1	0	2	2	0	2	1	1	0	2	2	2	0	2	0	2	2	0	0	0	0	0	0	2	2	0	0	0	0	0	1	0	0	0	0	0	0	2	2	1	0	0
721	0	2	0	0	2	1	1	1	1	1	1	0	2	1	1	0	1	1	2	0	2	0	1	1	0	1	0	0	0	0	0	2	0	0	0	0	0	2	0	0	0	0	0	0	2	2	1	0	0
722	2	0	0	0	2	0	0	0	0	0	0	1	1	0	0	0	0	0	1	0	1	1	0	0	0	0	0	0	0	1	0	1	0	0	0	0	0	1	0	1	0	0	0	1	1	1	0	1	0
723	2	0	0	0	0	0	0	0	0	0	0	1	1	0	0	0	0	0	1	0	1	1	0	0	0	0	0	0	0	2	0	1	0	0	0	0	0	1	0	1	0	0	0	1	1	1	0	1	0
724	0	1	0	0	1	1	1	1	1	1	1	0	2	1	0	0	0	0	2	0	2	0	1	1	0	0	0	0	0	0	0	0	2	0	0	0	2	0	0	1	0	1	0	0	1	1	0	1	1
725	0	2	0	0	2	2	2	2	0	1	1	0	2	2	0	0	0	0	1	0	1	0	1	1	1	0	0	0	0	0	0	2	1	0	0	0	1	0	0	1	0	1	0	0	0	1	1	0	0
726	0	0	2	2	2	0	0	0	0	2	1	0	1	0	0	0	0	0	1	0	1	0	1	1	1	0	1	0	0	2	1	1	2	1	1	1	1	0	0	1	0	1	0	0	1	1	2	0	1
727	0	2	0	0	2	2	2	2	2	1	1	0	2	1	0	1	0	0	0	1	0	0	0	0	1	1	0	0	0	0	0	1	1	0	0	0	0	2	0	0	0	0	0	0	1	2	2	0	0
728	0	2	0	0	2	2	2	2	2	0	0	1	1	1	0	1	0	0	0	1	0	0	0	0	1	1	0	0	0	0	0	1	1	0	0	0	0	2	0	0	0	0	0	0	1	2	2	0	0
729	1	0	1	1	2	0	0	0	0	1	2	0	1	1	0	2	0	0	2	0	2	1	0	0	1	0	0	0	0	1	1	0	0	0	0	0	0	1	0	1	0	0	0	0	2	2	1	0	0
730	1	1	0	0	1	2	2	2	0	1	2	0	0	0	0	2	0	0	2	0	2	0	1	1	0	1	0	0	0	0	0	0	0	0	0	0	2	0	0	1	0	1	0	0	1	1	0	0	0
731	0	0	1	1	2	2	2	2	2	2	2	2	0	2	1	1	2	2	1	1	1	0	0	0	1	1	0	1	1	0	0	1	0	0	0	0	0	2	0	0	0	0	0	0	2	2	1	0	0
732	0	1	1	1	2	0	0	0	0	1	1	1	0	0	0	0	0	0	0	1	0	0	0	0	0	2	0	1	1	0	1	1	0	0	0	0	1	1	0	2	1	1	1	1	1	1	0	0	1
733	0	1	2	2	1	0	0	0	0	1	1	0	2	2	1	0	0	0	1	0	1	1	0	0	1	0	0	0	0	1	0	0	0	0	0	0	0	1	0	1	0	1	0	2	0	0	0	1	1
734	1	1	0	0	2	0	1	1	0	2	2	1	1	1	0	1	0	0	1	0	1	0	1	1	1	0	0	0	0	0	1	2	1	0	0	0	0	0	0	1	0	1	0	1	1	1	0	1	1
735	1	1	0	0	2	0	1	1	0	1	1	1	1	1	0	1	0	0	1	0	1	0	1	1	0	0	0	0	0	0	1	2	0	0	0	0	0	0	0	0	0	1	0	1	1	1	0	1	0
736	0	2	0	0	2	0	0	0	0	1	2	1	1	2	0	2	0	0	1	0	1	0	0	0	2	0	1	0	0	1	1	1	1	0	0	0	0	0	0	1	1	1	0	0	1	2	1	0	1
737	0	1	1	1	2	0	0	0	0	1	0	0	1	1	0	2	2	2	1	0	1	0	0	0	1	1	1	0	0	1	1	1	2	0	0	0	0	1	0	1	1	0	0	0	2	2	1	1	1
738	0	1	1	1	0	0	0	0	0	1	2	1	1	2	1	2	0	0	2	0	2	0	2	2	0	0	0	0	0	0	0	1	0	0	0	0	0	1	0	0	1	1	1	2	0	0	0	0	0
739	0	1	1	1	0	0	0	0	0	1	2	1	1	2	1	2	0	0	2	0	2	0	2	2	0	0	0	0	0	0	0	1	0	0	0	0	1	1	0	0	0	1	1	2	0	0	0	0	0
740	0	0	1	2	2	0	0	0	0	1	0	0	2	1	0	0	1	1	2	0	2	0	0	0	1	0	0	0	0	0	0	1	1	0	0	0	1	0	0	2	0	0	0	1	1	1	1	0	1
741	0	1	2	2	1	0	0	0	0	1	1	0	2	1	0	0	1	1	2	0	2	0	0	0	1	1	0	0	0	0	1	0	1	0	0	0	1	0	0	1	0	0	0	1	1	1	2	0	1
742	0	2	0	0	0	0	0	0	0	2	2	2	0	0	0	1	0	0	1	0	1	0	0	0	1	0	0	0	0	0	0	0	1	0	0	0	1	0	0	1	0	1	0	1	1	1	1	0	2
743	0	2	0	0	0	0	0	0	0	2	2	1	0	0	0	1	0	0	0	1	0	0	1	1	1	0	0	0	0	0	1	0	1	0	0	0	0	0	0	1	2	1	0	1	1	1	1	0	1
744	2	0	0	0	1	0	0	0	0	0	1	0	2	1	0	1	0	0	1	1	1	0	0	0	0	2	0	0	0	0	0	0	1	1	0	0	0	1	0	0	0	0	0	1	1	1	0	0	0
745	2	0	0	0	1	0	0	0	0	1	1	1	1	1	0	1	1	1	2	0	2	0	1	1	0	0	0	0	0	0	0	1	1	2	0	0	0	1	0	2	0	1	0	0	1	1	2	0	0
746	1	1	0	0	0	0	0	0	0	2	2	0	2	1	0	1	1	2	1	0	1	0	1	1	0	1	0	0	0	0	0	0	0	0	0	0	0	0	0	1	0	1	0	0	1	1	2	0	0
747	1	0	1	1	0	0	0	0	0	1	1	1	1	2	1	2	0	0	2	0	2	0	1	1	0	0	0	0	0	0	0	1	0	1	0	0	0	1	0	1	0	0	0	1	1	1	1	0	0
748	1	0	1	1	0	0	0	0	0	1	1	1	1	2	1	2	0	0	1	0	1	0	2	2	0	0	0	0	0	0	0	0	0	1	0	0	1	1	0	1	1	0	0	1	1	1	1	0	0
749	1	0	2	2	2	0	0	0	0	0	0	0	2	1	0	1	1	1	2	0	2	0	2	2	0	0	0	0	0	0	0	0	2	0	0	0	0	0	1	2	0	1	0	0	1	1	1	0	1
750	1	1	0	0	2	0	0	0	0	2	1	1	1	1	0	0	0	0	1	1	1	0	0	0	1	1	0	0	0	0	0	0	1	0	0	0	0	0	0	0	0	0	0	1	1	1	2	0	1
751	0	2	0	0	2	0	0	0	0	0	1	0	2	0	0	0	2	2	2	0	2	0	0	0	0	2	0	0	0	0	2	0	1	0	0	0	1	1	0	0	0	0	0	0	2	2	2	0	0
752	0	2	0	0	2	2	2	2	2	1	0	1	1	0	0	0	1	1	1	0	1	0	0	0	1	1	0	0	0	0	1	2	1	0	0	0	2	0	0	0	0	1	0	0	0	1	1	1	0
753	1	1	0	0	0	0	0	0	0	2	1	1	0	0	0	1	0	0	0	1	0	0	0	0	1	1	0	0	0	0	1	0	0	0	0	0	1	0	1	0	1	1	0	1	1	1	1	0	0
754	0	2	0	0	0	0	0	0	0	2	1	2	0	0	0	0	0	0	2	0	2	0	0	0	2	0	0	0	0	0	0	0	1	0	0	0	0	2	0	0	1	1	0	1	1	1	0	0	0
755	0	1	1	1	0	2	2	2	1	2	2	1	1	2	1	0	0	0	0	0	0	0	0	0	1	0	0	0	0	0	0	1	1	0	0	0	0	1	0	1	0	0	0	1	0	1	1	0	0
756	0	1	1	1	1	2	2	2	1	1	1	1	1	1	1	0	0	0	0	0	0	0	0	0	1	0	0	0	0	0	0	1	0	0	0	0	1	1	0	1	0	0	0	1	0	1	1	0	0
757	1	1	0	0	0	1	1	1	0	2	1	0	1	2	0	1	1	1	2	0	2	0	1	1	2	0	0	0	0	0	0	1	0	0	0	0	1	0	0	1	0	1	0	0	0	1	0	0	0
758	0	2	0	0	0	2	2	2	2	1	1	1	1	1	0	2	1	1	2	0	2	0	0	0	2	0	0	0	0	0	0	1	2	0	0	0	1	1	0	2	1	1	0	0	0	1	2	0	0
759	0	2	0	0	2	0	0	0	0	1	1	2	0	1	1	0	1	1	2	0	2	0	0	0	1	1	0	0	0	0	0	0	0	0	0	0	0	2	0	0	0	1	0	0	1	1	1	0	0
760	0	2	0	0	1	2	2	2	2	1	1	1	1	1	1	2	0	0	1	0	1	0	0	0	1	1	0	0	0	0	0	2	0	0	0	0	2	0	0	0	0	0	0	0	0	2	0	0	0
761	0	1	0	0	0	0	0	0	0	1	1	1	1	1	1	0	0	0	1	0	1	0	0	0	1	1	0	0	0	0	1	1	0	0	0	0	0	2	0	0	0	2	0	1	0	0	1	0	0
762	0	2	0	0	2	0	0	0	0	2	2	0	1	1	1	2	0	0	1	0	1	0	0	0	2	0	0	0	0	0	0	2	0	0	0	0	0	0	0	0	1	2	1	2	0	0	2	0	0
763	0	2	0	0	0	1	1	1	1	1	1	0	1	1	0	0	0	0	0	0	0	0	1	1	1	0	0	0	0	0	0	0	0	0	0	0	1	0	0	0	1	1	0	0	1	1	1	0	0
764	0	2	0	0	2	1	1	1	0	1	1	0	1	1	0	1	0	0	1	1	1	0	1	1	1	0	0	0	0	1	1	0	0	0	0	0	1	1	0	1	1	0	0	0	2	2	0	0	0
765	0	1	1	1	2	2	2	2	2	1	1	1	1	0	0	2	2	2	1	1	1	0	0	0	0	2	0	0	0	0	2	0	0	0	0	0	1	1	0	2	0	2	0	0	0	0	0	0	0
766	0	2	0	0	1	0	0	0	0	2	2	1	1	0	0	0	1	1	1	1	1	0	0	0	1	1	0	0	0	0	1	1	0	0	0	0	0	1	0	0	1	0	0	1	1	1	2	0	2
767	1	1	0	0	2	1	0	1	0	0	1	0	2	1	0	1	1	1	2	0	2	0	0	0	1	1	0	0	0	0	2	1	0	0	0	0	1	0	0	2	0	1	0	0	1	1	1	0	0
768	1	1	0	0	2	1	1	1	1	0	1	0	2	2	0	1	1	1	2	0	2	0	0	0	0	2	0	0	0	0	2	1	0	0	0	0	0	2	0	0	0	0	0	0	2	2	1	0	0
769	1	1	0	0	2	1	1	1	1	2	2	0	2	2	0	2	0	0	0	1	0	0	0	0	0	2	0	0	0	0	0	0	1	0	0	0	0	2	0	1	0	0	0	0	2	2	2	0	0
770	0	1	2	2	2	2	2	2	2	2	2	1	1	1	0	0	0	0	1	1	1	0	0	0	0	2	0	0	0	0	1	0	1	0	0	0	1	1	0	0	0	0	0	1	1	1	1	0	0
771	0	2	0	0	1	0	0	0	0	1	1	2	0	1	1	0	0	0	1	0	1	0	0	0	2	0	0	0	0	0	0	1	0	0	0	0	1	1	0	0	0	1	0	0	0	1	1	0	0
772	0	2	0	0	1	1	1	1	1	1	1	2	0	1	1	2	0	0	1	0	1	0	0	0	1	1	0	0	0	0	0	2	0	0	0	0	2	0	0	0	0	1	1	1	0	1	1	0	0
773	1	1	0	0	2	0	0	0	0	1	1	1	1	1	0	0	0	0	1	1	1	0	0	0	1	1	0	0	0	0	0	0	0	0	0	0	1	0	0	0	0	0	0	1	1	1	2	0	0
774	2	0	0	0	2	1	1	1	1	2	1	1	0	1	0	1	1	1	2	0	2	0	1	1	1	0	0	0	0	0	0	0	1	0	0	0	1	0	0	2	0	1	0	0	1	1	1	0	1
775	1	0	1	1	0	0	0	0	0	1	1	1	1	2	1	1	0	0	2	0	2	0	1	1	0	0	0	0	0	0	0	1	0	1	0	0	1	1	0	1	0	0	0	1	1	1	1	0	0
776	1	0	1	1	0	0	0	0	0	1	1	2	0	1	1	1	0	0	1	0	1	0	2	2	0	0	0	0	0	0	0	0	0	1	1	1	0	0	0	0	0	0	0	1	1	1	1	0	0
777	1	1	0	0	0	2	2	2	1	2	2	1	1	2	0	2	0	0	1	1	1	0	1	1	0	1	0	0	0	0	0	0	2	0	0	0	1	1	0	0	0	0	0	0	1	2	1	0	0
778	1	1	0	0	0	1	1	1	0	2	1	1	1	2	0	1	1	1	2	0	2	0	1	1	1	0	0	0	0	0	0	1	0	0	0	0	1	0	0	1	0	1	0	0	0	1	0	0	0
779	0	1	1	1	0	0	0	0	0	1	1	1	1	1	1	1	0	0	1	0	1	0	0	0	0	2	0	1	1	0	1	2	0	0	0	0	0	2	0	0	0	2	1	2	0	0	2	0	1
780	0	1	1	1	0	0	0	0	0	1	1	1	1	1	1	0	0	0	1	0	1	0	0	0	1	1	0	0	0	0	1	1	0	0	0	0	0	2	0	0	0	2	0	1	0	0	1	0	1
781	0	2	0	0	2	1	1	1	1	0	1	1	1	0	0	0	2	2	2	0	2	0	0	0	1	1	0	0	0	0	1	1	1	0	0	0	1	1	0	0	0	0	0	0	2	2	2	0	0
782	0	2	0	0	2	0	0	0	0	0	1	0	2	0	0	1	2	2	2	0	2	0	0	0	0	2	0	0	0	0	2	0	1	0	0	0	1	1	0	0	0	0	0	0	2	2	2	0	0
783	2	0	0	0	2	0	0	0	0	1	1	1	1	0	0	1	0	0	1	0	1	1	0	0	1	0	0	0	0	1	0	1	1	0	0	0	0	1	0	2	0	0	0	1	1	1	0	1	1
784	2	0	0	0	0	0	0	0	0	1	1	1	1	0	0	0	0	0	1	0	1	1	0	0	2	0	0	0	0	1	0	1	1	0	0	0	0	1	0	2	0	0	0	2	0	0	0	1	1
785	0	1	1	1	2	2	2	2	2	1	1	1	1	0	0	2	0	0	1	0	1	0	0	0	0	2	0	0	0	0	1	1	1	0	0	0	1	1	0	0	0	0	0	1	0	1	1	0	0
786	0	1	2	2	2	0	0	0	0	1	1	1	1	0	0	0	0	0	1	0	1	0	0	0	0	2	0	0	0	0	1	2	0	0	0	0	1	1	0	0	0	0	0	1	0	1	2	0	0
787	0	2	0	0	0	0	0	0	0	2	1	0	0	0	0	1	0	0	2	0	2	0	0	0	2	0	0	0	0	0	0	0	0	0	0	0	0	1	0	0	1	1	0	1	1	1	0	0	0
788	1	1	0	0	0	0	0	0	0	2	1	2	0	0	0	0	0	0	1	0	1	0	0	0	2	0	0	0	0	0	0	0	0	0	0	0	1	1	0	0	1	0	0	0	2	2	0	0	0
789	0	2	0	0	1	1	1	1	1	1	1	1	1	1	1	0	1	1	2	0	2	0	0	0	0	2	0	1	1	0	1	2	0	0	0	0	0	2	0	0	0	0	0	0	2	2	1	0	0
790	0	2	0	0	1	1	1	1	1	1	1	1	1	1	1	2	1	1	2	0	2	0	0	0	0	2	0	1	1	0	1	2	0	0	0	0	1	1	0	0	0	0	0	0	2	2	1	0	0
791	0	2	0	0	2	1	1	1	1	2	0	0	2	2	0	2	1	1	1	0	1	0	0	0	2	0	0	0	0	0	0	2	1	0	0	0	1	1	0	1	0	1	0	0	0	1	1	0	0
792	0	2	0	0	2	2	2	2	2	1	1	1	1	1	0	2	0	0	0	2	0	0	0	0	0	2	0	0	0	0	0	0	0	0	0	0	0	2	0	0	0	0	0	0	2	2	2	0	0
793	0	1	1	1	2	2	2	2	2	0	0	2	0	1	1	0	0	0	1	0	1	0	0	0	0	2	0	1	1	0	0	2	0	0	0	0	0	2	0	0	0	0	0	0	0	2	0	0	0
794	0	1	2	2	0	2	2	2	1	0	0	1	1	2	2	0	0	0	0	0	0	0	0	0	0	0	0	0	0	0	0	0	2	0	0	0	0	2	0	1	0	0	0	2	0	0	0	0	0
795	1	0	2	2	2	0	0	0	0	1	2	1	1	2	1	2	0	0	2	0	2	1	0	0	1	0	0	0	0	1	1	0	2	0	0	0	0	1	0	0	0	0	0	0	2	2	1	0	0
796	0	1	2	2	1	0	0	0	0	2	2	1	1	1	1	1	0	0	2	0	2	1	0	0	0	1	0	0	0	1	0	1	2	0	0	0	1	0	0	1	0	0	0	0	2	2	1	0	0
797	2	0	0	0	1	0	0	0	0	1	2	1	1	1	1	0	0	0	2	0	2	0	0	0	1	1	0	0	0	0	1	1	2	0	0	0	1	1	0	1	0	1	1	1	1	1	1	0	0
798	0	1	0	1	2	0	0	0	0	1	1	0	2	0	0	1	1	1	2	0	2	0	0	0	1	0	0	0	0	0	0	0	0	0	0	0	1	0	0	1	0	1	0	1	0	0	1	1	0
799	2	0	0	0	1	0	0	0	0	0	1	0	1	1	0	0	0	0	1	1	1	0	0	0	0	1	0	0	0	0	0	1	0	1	1	1	0	1	0	1	0	0	0	1	1	1	1	0	0
800	2	0	0	0	2	0	0	0	0	0	1	0	1	0	0	1	0	0	0	1	0	0	1	1	0	1	0	0	0	0	0	0	0	0	0	0	1	0	0	1	0	1	0	0	1	1	0	0	0
801	0	1	0	0	2	0	0	0	0	2	2	2	0	1	0	2	2	2	1	1	1	0	0	0	0	2	0	0	0	0	2	0	0	0	0	0	1	1	0	2	0	2	0	0	0	0	0	0	0
802	0	2	0	0	1	0	0	0	0	2	2	1	1	1	0	0	1	1	1	1	1	0	0	0	1	1	0	0	0	0	1	0	1	0	0	0	1	0	0	1	1	1	0	1	0	0	1	0	1
803	0	2	0	0	1	1	1	2	0	1	1	0	1	1	0	2	0	0	0	2	0	0	1	1	0	1	0	0	0	2	2	1	1	0	0	0	1	0	1	1	0	1	0	1	1	1	1	0	0
804	0	2	0	0	0	1	1	1	1	1	1	0	1	1	0	2	0	0	1	1	1	0	1	1	1	0	0	0	0	1	1	0	0	0	0	0	1	1	0	1	1	0	0	0	2	2	0	0	0
805	1	1	1	1	0	0	0	0	0	2	1	1	1	1	0	0	0	0	1	0	1	0	1	1	1	0	0	0	0	0	1	2	2	0	0	0	0	0	0	1	0	1	0	1	1	1	0	1	1
806	1	1	0	0	2	0	0	0	0	2	1	1	1	1	0	0	0	0	1	0	1	0	1	1	1	0	0	0	0	0	1	2	2	0	0	0	0	0	0	1	0	1	0	1	1	1	0	1	1
807	0	2	0	0	0	2	2	2	2	2	2	0	1	1	1	1	0	0	0	2	0	0	0	0	0	1	0	0	0	0	1	0	1	0	0	0	0	1	0	0	2	2	0	1	0	0	1	0	0
808	1	1	0	0	2	0	0	0	0	1	1	1	1	1	1	2	0	0	0	1	0	0	0	0	0	2	0	1	1	0	1	1	2	0	0	0	0	2	0	2	0	1	0	1	0	1	1	0	0
809	1	1	0	0	0	0	0	0	0	1	0	1	1	1	0	0	0	0	1	0	1	1	0	0	0	0	0	0	0	1	1	1	0	0	0	0	1	1	0	2	1	0	0	1	1	1	0	1	1
810	1	1	0	0	0	0	0	0	0	1	0	1	1	1	0	1	0	0	1	0	1	1	0	0	1	0	0	0	0	1	0	0	0	0	0	0	1	1	0	1	1	1	0	2	0	0	0	1	1
811	0	1	1	1	0	0	0	0	0	1	2	0	2	2	1	2	0	0	2	0	2	0	2	2	0	0	0	0	0	0	0	1	0	0	0	0	1	1	0	0	0	1	1	2	0	0	0	0	0
812	0	0	2	2	0	0	0	0	0	2	2	1	1	2	1	0	2	2	2	0	2	0	0	0	0	2	0	0	0	0	2	0	0	0	0	0	1	1	0	1	0	1	0	1	0	0	0	0	0
813	0	2	0	0	0	0	0	0	0	2	2	1	0	0	0	1	0	0	1	0	1	0	0	0	0	1	0	0	0	0	1	1	0	0	0	0	1	0	0	1	1	1	0	0	1	1	0	0	2
814	0	2	0	0	0	0	0	0	0	2	1	1	1	1	0	0	0	0	0	1	0	0	1	1	0	1	0	0	0	0	2	0	0	0	0	0	1	0	0	1	1	1	0	1	1	1	1	0	1
815	1	1	0	0	2	0	0	0	0	0	1	0	2	0	0	1	1	1	1	0	1	0	0	0	1	0	0	0	0	0	0	0	0	0	0	0	1	0	0	1	0	1	0	0	1	1	0	1	0
816	0	2	0	0	2	0	0	0	0	2	2	0	2	1	0	1	1	1	2	0	2	0	0	0	2	0	0	0	0	0	2	0	1	0	0	0	1	0	0	2	0	1	0	0	1	1	1	0	0
817	1	1	0	0	2	0	0	0	0	1	2	0	2	2	0	2	2	2	1	1	1	0	0	0	1	1	0	0	0	0	2	0	0	0	0	0	1	1	0	1	0	1	0	0	1	1	0	1	0
818	0	1	1	1	1	0	0	0	0	1	1	0	2	1	0	1	0	0	1	0	1	0	1	1	0	0	0	0	0	0	0	0	2	0	0	0	0	0	0	2	0	0	0	1	1	1	0	1	1
819	1	0	2	2	1	0	0	0	0	0	1	0	2	2	0	0	0	0	2	0	2	0	0	0	1	0	0	0	0	0	0	0	1	0	0	0	1	0	0	1	0	1	0	0	1	1	0	1	0
820	0	0	0	0	2	2	2	2	1	0	0	2	0	2	1	0	2	2	1	1	1	0	1	1	1	0	0	0	0	0	0	0	0	0	0	0	1	0	0	0	0	0	0	2	0	0	1	0	0
821	0	0	0	0	2	2	2	2	1	1	1	2	0	0	0	0	1	1	1	1	1	0	0	0	1	1	0	1	1	0	0	1	1	0	0	0	2	0	0	1	0	0	0	2	0	0	1	0	0
822	1	1	0	0	2	0	0	0	0	1	1	0	1	1	0	1	0	0	0	1	0	0	0	0	0	2	0	0	0	0	1	0	1	0	0	0	0	2	0	1	0	0	0	1	1	1	1	0	0
823	1	1	0	0	2	1	1	1	1	2	1	0	2	1	0	2	1	1	1	0	1	0	1	1	0	1	0	0	0	0	1	0	2	0	0	0	1	1	0	2	0	1	0	0	1	1	1	0	0
824	0	1	0	0	0	0	0	0	0	2	1	1	1	1	0	0	1	1	2	0	2	0	0	0	1	0	0	0	0	0	0	2	0	0	0	0	1	0	0	2	0	0	0	1	1	1	1	0	1
825	0	0	0	2	2	0	0	0	0	1	0	0	2	1	0	0	1	2	2	0	2	0	0	0	0	1	0	0	0	0	1	1	1	0	0	0	1	0	0	2	0	0	0	1	1	1	1	0	1
826	0	2	0	0	2	0	0	0	0	1	2	1	1	1	0	2	0	0	1	0	1	0	0	0	2	0	0	0	0	0	1	0	1	0	0	0	0	1	0	1	1	1	0	0	1	2	0	0	1
827	0	2	0	0	2	0	0	0	0	1	2	1	1	2	0	0	0	0	1	0	1	0	0	0	2	0	0	0	0	0	1	0	1	0	0	0	0	1	0	1	1	1	0	0	1	2	0	0	1
828	1	1	0	0	1	0	0	0	0	0	1	1	1	1	0	2	0	0	2	0	2	0	0	0	2	0	0	0	0	0	1	0	1	0	0	0	0	2	0	1	1	0	0	0	1	2	1	1	0
829	0	2	0	0	1	1	1	1	1	1	1	0	2	0	0	2	0	0	1	1	1	0	0	0	2	0	0	0	0	0	0	1	0	0	0	0	0	2	0	1	1	0	0	0	1	2	1	1	0
830	0	1	1	1	0	2	2	2	2	2	2	1	1	0	0	2	1	1	2	0	2	0	0	0	0	2	0	0	0	0	1	0	0	0	0	0	1	0	0	1	0	1	0	1	0	0	1	0	0
831	0	1	0	0	0	0	0	0	0	2	0	0	1	0	0	1	0	0	1	0	1	0	0	0	1	0	2	0	0	2	0	1	0	2	2	2	1	0	0	0	0	0	0	0	2	2	1	1	1
832	0	2	0	0	2	0	0	0	0	1	2	1	1	1	0	2	0	0	1	0	1	0	0	0	1	0	0	0	0	0	0	0	0	0	0	0	1	0	0	0	1	1	0	0	1	1	0	1	1
833	1	0	1	1	2	1	1	1	1	2	2	0	2	1	1	1	0	0	0	1	0	0	0	0	1	1	0	1	1	0	0	1	1	0	0	0	0	1	0	2	0	1	1	1	1	1	0	0	1
834	1	0	1	1	2	1	1	1	1	0	1	0	2	1	1	0	0	0	0	1	0	0	0	0	0	1	0	1	1	0	0	0	0	0	0	0	0	1	0	1	0	1	1	1	1	1	0	0	1
835	0	1	0	0	1	1	1	1	0	2	2	2	0	2	1	0	2	2	1	1	1	0	1	1	1	0	0	0	0	0	0	1	0	0	0	0	1	0	0	1	0	0	0	2	0	0	1	0	0
836	0	0	0	0	2	2	2	2	1	1	1	2	0	2	1	0	1	1	1	1	1	0	0	0	1	1	0	1	1	0	0	2	0	0	0	0	1	1	0	1	0	0	0	2	0	0	1	0	0
837	1	1	0	0	2	0	0	0	0	1	1	0	1	1	0	1	0	0	1	1	1	0	0	0	1	1	0	0	0	0	0	0	0	0	0	0	1	0	0	0	0	0	0	1	1	1	2	0	1
838	1	1	0	0	2	1	1	1	1	2	1	1	1	1	0	0	0	0	1	1	1	0	0	0	0	1	0	0	0	0	0	1	1	0	0	0	0	0	0	1	0	0	0	1	1	1	1	0	1
839	0	1	1	1	1	1	1	1	1	1	1	0	2	1	0	1	0	0	1	0	1	0	1	1	0	0	0	0	0	0	0	1	2	0	0	0	1	0	0	2	0	0	0	1	1	1	0	1	1
840	1	0	1	1	1	0	0	0	0	0	1	0	2	2	0	0	0	0	2	0	2	0	0	0	1	0	0	0	0	0	0	0	1	0	0	0	1	0	0	1	0	1	0	0	1	1	0	1	1
841	1	1	0	0	0	0	0	0	0	1	0	0	2	2	1	1	0	0	1	0	1	1	0	0	1	0	0	0	0	1	0	0	0	0	0	0	0	1	0	1	1	1	0	2	0	0	0	1	1
842	2	0	0	0	2	1	1	1	0	1	1	2	1	0	0	2	0	0	2	0	2	1	0	0	0	0	0	0	0	2	0	0	0	0	0	0	0	2	0	2	0	0	0	2	0	0	0	1	0
843	0	2	0	0	2	0	0	0	0	2	2	0	2	2	0	0	1	1	1	1	1	0	0	0	0	2	0	0	0	0	1	1	0	0	0	0	1	1	0	1	0	0	0	0	2	2	1	0	0
844	1	1	0	0	2	0	0	0	0	1	2	0	2	2	0	2	1	1	2	0	2	0	0	0	1	1	0	0	0	0	2	0	0	0	0	0	1	1	0	2	0	1	0	0	1	1	1	0	0
845	0	1	1	1	2	0	0	0	0	2	2	0	2	1	0	0	0	0	1	0	1	0	1	1	1	0	0	0	0	2	2	1	1	1	1	1	1	0	0	1	0	1	0	0	1	1	2	0	1
846	0	0	2	2	2	0	0	0	0	2	1	1	1	0	0	1	0	0	1	0	1	0	0	0	1	0	1	0	0	1	0	1	1	1	1	1	1	0	0	0	0	1	0	0	1	1	1	1	1
847	0	2	0	0	2	1	1	1	1	1	1	1	1	1	1	2	0	0	1	0	1	0	0	0	2	0	0	0	0	0	0	1	0	0	0	0	1	1	0	0	0	1	0	0	0	1	1	0	0
848	0	2	0	0	1	0	0	0	0	1	1	1	1	1	1	0	1	1	2	0	2	0	0	0	0	2	0	1	1	0	1	1	0	0	0	0	0	2	0	0	0	1	1	1	1	1	2	0	0
849	0	2	0	0	0	2	2	2	2	0	0	1	1	1	0	0	0	0	1	1	1	0	0	0	1	1	0	0	0	0	0	0	2	0	0	0	1	1	0	0	0	1	0	0	1	1	1	0	0
850	1	1	0	0	0	1	1	1	0	2	1	1	1	2	0	1	1	1	2	0	2	0	1	1	1	0	0	0	0	0	0	1	0	0	0	0	1	0	0	1	0	1	0	0	0	1	0	0	0
851	0	1	1	1	1	2	2	2	1	1	1	1	0	1	1	0	0	0	0	0	0	0	0	0	1	0	0	0	0	0	0	1	0	0	0	0	1	1	0	1	0	0	0	1	0	1	1	0	0
852	0	1	1	1	1	2	2	2	1	1	1	1	0	1	1	0	0	0	0	0	0	0	0	0	1	0	0	0	0	0	0	2	0	0	0	0	0	1	0	1	0	0	0	1	1	1	1	0	0
853	0	2	0	0	0	0	0	0	0	2	1	1	1	1	0	0	1	1	2	0	2	0	0	0	2	0	0	0	0	0	0	0	0	0	0	0	0	0	0	1	0	0	0	1	1	1	2	0	0
854	0	2	0	0	0	0	0	0	0	2	1	0	2	1	0	0	1	1	2	0	2	0	0	0	1	1	0	0	0	0	1	0	0	0	0	0	1	0	0	1	0	0	0	1	1	1	2	0	0
855	0	1	1	1	2	0	0	0	0	2	2	1	1	1	0	2	0	0	1	1	1	0	0	0	0	2	0	0	0	0	1	0	1	0	0	0	1	1	0	0	0	0	0	1	1	1	1	0	0
856	1	1	0	0	2	1	1	1	1	1	1	1	1	1	0	1	0	0	1	0	1	0	0	0	1	1	0	0	0	0	1	1	0	0	0	0	1	1	0	0	0	0	0	1	0	1	1	0	0
857	0	1	1	1	2	0	0	0	0	2	2	0	2	0	0	0	0	0	2	0	2	1	0	0	1	0	0	0	0	2	0	0	1	0	0	0	0	2	0	1	0	0	0	0	2	2	1	0	0
858	0	2	0	0	2	1	1	1	1	1	0	1	1	0	0	0	2	2	2	0	2	0	0	0	0	2	0	0	0	0	2	0	1	0	0	0	1	1	0	0	0	1	0	0	1	1	1	1	0
859	0	2	0	0	2	0	0	1	2	0	1	0	2	0	0	2	1	1	1	0	1	0	0	0	1	1	0	0	0	0	1	1	1	0	0	0	1	0	0	0	0	0	0	0	1	2	2	0	0
860	1	0	1	1	0	1	1	1	0	1	1	2	0	1	0	0	1	1	1	1	1	0	1	1	0	1	0	0	0	0	1	0	0	0	0	0	1	1	0	1	0	1	0	1	0	0	0	0	0
861	1	1	0	0	0	1	1	1	0	0	1	1	1	1	0	2	0	0	2	0	2	0	1	1	0	1	0	0	0	0	0	2	0	0	0	0	1	1	0	0	1	1	0	2	0	0	0	0	0
862	0	1	2	2	1	0	0	0	0	2	2	0	2	0	0	1	0	0	2	0	2	0	1	1	0	1	0	0	0	1	2	0	1	0	0	0	1	0	0	2	0	1	0	1	0	0	2	0	0
863	0	2	0	0	1	2	2	2	2	1	1	1	1	0	0	0	0	0	1	1	1	0	0	0	1	1	0	0	0	0	1	0	1	0	0	0	0	1	0	0	1	0	0	1	1	1	2	0	1
864	0	1	0	0	2	0	0	0	0	2	2	1	1	1	0	2	0	0	1	1	1	0	0	0	1	2	0	0	0	0	2	0	0	0	0	0	1	1	0	2	0	2	0	0	0	0	0	0	0
865	0	2	0	0	0	2	2	2	2	2	2	0	1	1	1	1	0	0	0	2	0	0	0	0	0	1	0	0	0	0	1	0	1	0	0	0	0	2	0	1	1	2	0	2	0	0	1	0	0
866	0	2	0	0	1	1	1	1	0	2	2	0	1	2	1	1	0	0	0	1	0	0	0	0	0	1	0	1	1	0	0	1	1	0	0	0	1	1	0	0	0	1	0	0	0	1	1	0	0
867	0	2	0	0	2	1	1	1	1	1	0	1	1	1	0	0	0	0	0	1	0	0	0	0	1	1	0	0	0	0	0	1	0	0	0	0	0	2	0	0	0	0	0	0	1	2	2	0	0
868	0	2	0	0	2	2	2	2	2	0	0	1	1	1	0	1	0	0	0	1	0	0	0	0	1	1	0	0	0	0	0	1	1	0	0	0	1	1	0	1	0	0	0	0	1	2	1	0	0
869	0	1	1	1	2	1	1	1	1	1	1	1	1	2	1	2	2	2	2	0	2	0	0	0	0	2	0	1	1	0	1	2	0	0	0	0	1	1	0	1	0	2	0	0	0	1	0	0	0
870	0	2	0	0	1	1	1	0	1	2	2	1	1	2	1	1	0	0	2	0	1	0	1	1	0	1	0	1	1	0	1	2	0	0	0	0	1	0	0	2	0	1	0	1	0	0	0	0	0
871	0	2	0	0	2	0	0	0	0	1	1	1	1	2	0	1	1	1	1	0	1	0	0	0	0	2	0	0	0	0	1	0	1	0	0	0	0	1	0	1	1	0	0	0	2	2	0	1	1
872	0	1	1	1	2	0	0	0	0	1	0	0	1	1	0	2	1	1	1	0	1	0	0	0	1	1	0	0	0	1	1	1	2	0	0	0	0	2	0	1	0	0	0	0	2	2	1	1	1
873	2	0	0	0	0	1	1	1	0	0	0	2	0	0	0	2	0	0	1	0	1	0	2	2	0	0	0	0	0	0	0	2	0	1	1	1	1	0	0	0	1	0	0	1	1	1	1	0	0
874	1	0	1	1	0	0	0	0	0	1	1	1	1	2	1	1	0	0	2	0	2	0	1	1	0	0	0	0	0	0	0	1	0	0	0	0	1	1	0	1	0	0	0	1	1	1	1	0	0
875	0	2	0	0	0	0	0	0	0	2	2	1	0	0	0	1	0	0	1	0	1	0	0	0	0	1	0	0	0	0	1	1	1	1	1	1	1	0	0	1	1	1	0	0	1	1	0	0	2
876	0	2	0	0	0	0	0	0	0	2	2	1	1	1	0	0	0	0	0	1	0	0	0	0	0	1	0	0	0	0	1	0	2	0	0	0	1	0	0	2	0	0	0	0	2	2	1	0	1
877	1	1	0	0	1	1	1	1	1	0	1	1	1	0	0	2	0	0	2	0	2	0	0	0	2	0	0	0	0	0	1	0	2	0	0	0	1	1	0	2	1	0	0	0	1	2	1	0	0
878	1	1	0	0	2	1	1	1	0	1	2	0	1	2	0	2	0	0	1	1	1	0	0	0	1	1	0	0	0	0	0	1	0	0	0	0	0	2	0	1	1	0	0	0	1	2	1	1	0
879	1	1	0	0	0	0	1	1	0	2	2	1	1	1	0	0	0	0	1	0	1	0	1	1	1	0	0	0	0	0	1	2	1	0	0	0	1	0	0	1	0	1	0	1	1	1	0	1	1
880	1	1	0	0	2	0	0	0	0	1	0	1	1	1	0	0	0	0	1	0	1	0	1	1	0	0	0	0	0	0	1	2	1	0	0	0	0	0	0	0	0	1	0	1	1	1	0	1	1
881	0	1	2	2	0	0	0	0	0	2	2	1	1	1	1	0	0	0	1	0	1	0	0	0	1	1	0	0	0	0	1	2	0	0	0	0	0	2	0	0	0	2	0	1	0	0	1	0	1
882	0	2	0	0	1	0	0	0	0	2	2	1	1	1	1	1	0	0	1	0	1	0	0	0	1	1	0	1	1	0	0	2	0	0	0	0	0	0	0	0	2	2	1	2	0	0	2	0	0
883	0	2	0	0	0	0	0	0	0	2	1	1	0	0	0	0	0	0	1	0	1	0	0	0	2	0	0	0	0	0	0	0	1	0	0	0	1	1	0	0	1	0	0	0	2	2	0	0	0
884	0	2	0	0	0	0	0	0	0	2	1	1	0	0	0	0	0	0	2	0	2	0	0	0	2	0	0	0	0	0	0	0	1	0	0	0	1	1	0	0	1	1	0	1	1	1	0	0	0
885	1	1	0	0	0	1	1	1	1	1	1	0	2	1	0	2	0	0	0	0	0	0	2	2	0	0	0	0	0	0	0	0	0	0	0	0	1	0	0	2	0	1	0	0	1	1	2	0	0
886	0	1	1	1	0	0	0	0	0	1	1	1	1	0	0	2	0	0	0	0	0	0	1	1	0	1	0	0	0	0	1	0	0	0	0	0	1	0	0	2	0	1	0	0	1	1	2	0	0
887	0	2	0	0	0	0	0	0	0	1	1	0	1	1	0	2	0	0	0	1	0	0	1	1	0	1	0	0	0	0	1	1	0	0	0	0	1	0	1	0	1	2	0	1	0	0	2	0	0
888	0	2	0	0	0	0	0	0	0	1	1	0	2	1	0	0	0	0	2	0	2	0	1	1	1	0	0	0	0	0	0	1	0	0	0	0	1	1	0	0	1	1	0	0	1	1	1	0	0
889	0	2	0	0	2	2	2	2	2	1	0	1	1	0	0	0	2	2	2	0	2	0	0	0	0	2	0	0	0	0	2	0	1	0	0	0	1	1	0	0	0	1	0	0	1	1	1	1	0
890	0	2	0	0	2	2	2	2	2	1	0	0	2	0	0	0	1	1	1	0	1	0	0	0	1	1	0	0	0	0	2	1	1	0	0	0	2	0	0	0	0	1	0	0	0	1	1	1	0
891	2	0	0	0	1	0	0	0	0	0	1	0	2	1	0	2	0	0	1	1	1	0	0	0	0	1	0	0	0	0	0	0	1	1	1	1	1	0	0	1	0	1	0	0	1	1	1	0	0
892	0	2	0	0	0	0	0	0	0	1	1	0	1	1	0	0	0	0	0	2	0	0	1	1	1	0	0	0	0	1	1	0	0	0	0	0	1	1	0	1	1	0	0	0	2	2	0	0	0
893	0	2	0	0	2	1	1	1	0	1	1	0	1	1	0	2	0	0	0	2	0	0	1	1	1	0	0	0	0	1	1	0	2	0	0	0	1	0	1	1	0	0	0	0	2	2	1	0	0
894	1	1	0	0	2	0	0	0	0	1	1	1	0	1	0	0	0	0	1	1	1	0	0	0	1	1	0	0	0	0	0	0	0	0	0	0	0	0	0	0	0	0	0	1	1	1	2	0	1
895	1	1	0	0	2	2	2	2	2	2	1	0	2	1	0	2	1	1	2	0	2	0	1	1	1	0	0	0	0	0	0	0	1	0	0	0	1	0	0	1	0	1	0	0	1	1	2	0	0
896	1	1	0	0	2	1	1	1	0	2	2	0	1	1	0	1	0	0	1	1	1	0	1	1	0	0	0	0	0	0	0	1	1	0	0	0	0	1	0	0	0	0	0	0	1	2	1	1	0
897	0	2	0	0	1	0	0	0	0	1	1	1	1	0	0	0	0	0	1	1	1	0	0	0	1	1	0	0	0	0	0	1	2	0	0	0	1	1	0	0	0	0	0	0	1	2	1	1	0
898	1	0	1	1	2	0	0	0	0	1	2	0	1	0	0	2	0	0	2	0	2	1	0	0	1	0	0	0	0	1	1	0	1	0	0	0	0	0	0	1	0	0	0	0	2	2	1	0	0
899	0	1	1	1	2	0	0	0	0	2	2	0	1	0	0	1	0	0	2	0	2	0	0	0	1	1	0	0	0	0	1	1	1	0	0	0	0	1	0	1	0	1	1	1	1	1	1	0	0
900	0	0	2	2	2	0	0	0	0	2	1	0	1	0	0	0	0	0	1	0	1	0	1	1	1	0	1	0	0	2	1	1	2	1	1	1	1	0	0	1	0	1	0	0	1	1	2	0	1
901	0	1	1	1	0	0	0	0	0	1	1	0	2	0	0	2	0	0	1	0	1	0	0	0	2	0	2	0	0	2	0	1	0	2	2	2	1	0	0	0	0	2	0	0	0	0	2	0	0
902	0	1	1	1	0	2	2	2	1	2	2	1	0	1	1	1	0	0	0	1	0	0	0	0	0	1	0	0	0	0	0	0	0	0	0	0	1	1	0	1	0	0	0	1	1	1	1	0	0
903	0	1	0	0	2	2	2	2	2	1	1	1	1	2	1	0	0	0	1	1	1	0	0	0	0	2	0	1	1	0	0	1	1	0	0	0	0	2	0	0	0	0	0	0	2	2	1	0	0
904	1	1	0	0	2	1	1	1	0	2	1	0	1	2	0	0	1	1	2	0	2	0	1	1	1	0	0	0	0	0	0	1	0	0	0	0	1	0	0	1	0	1	0	0	0	1	2	0	0
905	1	1	0	0	0	2	2	2	1	2	2	0	2	2	0	2	0	0	1	1	1	0	0	0	1	1	0	0	0	0	0	0	1	0	0	0	0	2	0	1	1	0	0	0	1	2	2	0	0
906	1	0	0	0	2	1	1	1	1	1	2	1	1	1	1	1	0	0	0	1	0	0	0	0	1	1	0	0	0	0	0	0	1	0	0	0	0	1	0	2	0	1	1	1	1	1	0	0	1
907	2	0	0	0	0	0	0	0	0	1	1	2	0	0	0	0	0	0	1	0	1	1	0	0	1	0	0	0	0	1	0	2	1	0	0	0	0	1	0	2	0	0	0	1	1	1	0	1	0
908	1	1	0	0	0	0	0	0	0	2	1	1	1	1	0	0	0	0	1	0	1	0	1	1	1	0	0	0	0	0	1	2	2	0	0	0	1	0	0	1	0	1	0	1	1	1	0	1	1
909	1	1	0	0	2	0	0	0	0	1	0	1	1	1	0	0	0	0	1	0	1	0	1	1	0	0	0	0	0	0	1	2	1	0	0	0	1	0	0	0	0	1	0	1	1	1	0	1	0
910	0	2	0	0	2	0	0	0	0	1	2	1	1	2	0	2	0	0	1	0	0	0	0	0	2	0	0	0	0	0	1	0	1	0	0	0	0	1	0	1	1	1	0	0	1	2	0	0	1
911	0	1	0	0	2	0	0	0	0	1	0	0	1	0	0	2	1	1	1	0	1	0	0	0	1	1	0	0	0	0	1	0	2	0	0	0	0	1	0	0	1	0	0	0	2	2	0	1	1
912	0	0	2	2	0	0	0	0	0	2	2	2	0	2	1	2	1	1	1	1	1	0	1	1	0	1	0	0	0	0	1	0	0	0	0	0	0	1	0	1	0	1	0	1	0	0	0	0	0
913	0	0	2	2	0	0	0	0	0	2	2	0	1	2	1	1	1	1	1	1	1	0	1	1	0	1	0	0	0	0	1	0	0	0	0	0	0	1	0	0	0	1	0	1	0	0	0	0	0
914	0	2	0	0	1	0	0	0	0	2	2	1	1	1	0	2	1	1	1	1	1	0	0	0	1	1	0	0	0	0	1	0	1	0	0	0	1	2	0	1	1	1	0	1	0	0	1	0	0
915	0	2	0	0	1	1	1	1	1	1	1	1	1	0	0	0	1	1	1	1	1	0	0	0	1	1	0	0	0	0	1	0	1	0	0	0	0	1	0	0	1	0	0	1	1	1	2	0	1
916	0	2	0	0	1	0	0	0	0	1	1	1	1	1	1	2	0	0	1	0	1	0	0	0	0	2	0	1	1	0	1	1	0	0	0	0	2	0	0	0	0	1	1	1	0	1	1	0	0
917	0	2	0	0	1	2	2	2	2	1	1	1	1	1	1	2	0	0	1	0	1	0	0	0	1	1	0	1	1	0	0	2	0	0	0	0	2	0	0	0	0	1	1	1	0	1	1	0	0
918	0	2	0	0	1	1	1	1	1	1	1	1	1	1	1	0	2	2	2	0	2	0	1	1	0	1	0	0	0	0	1	2	0	0	0	0	0	1	0	0	0	0	0	1	1	1	1	0	0
919	1	0	1	1	0	0	0	0	0	1	1	1	1	2	1	1	0	0	2	0	2	0	1	1	0	0	0	0	0	0	0	1	0	1	0	0	1	1	0	1	0	0	0	1	1	1	1	0	0
920	2	0	0	0	0	1	1	1	0	0	0	2	0	0	0	2	0	0	1	0	1	0	1	1	0	1	0	0	0	0	0	1	0	1	1	1	1	0	0	0	1	0	0	1	1	1	1	0	0
921	1	1	0	0	2	2	2	2	0	2	2	0	2	2	0	0	2	2	2	0	2	0	0	0	0	2	0	0	0	0	0	0	0	0	0	0	1	0	0	2	0	2	0	0	0	0	1	0	0
922	1	1	0	0	2	0	0	0	0	1	2	0	2	2	0	2	1	1	2	0	2	0	0	0	0	2	0	0	0	0	2	0	0	0	0	0	1	0	0	2	0	1	0	0	1	1	1	0	0
923	0	2	0	0	0	0	0	0	0	2	1	1	0	0	0	0	0	0	2	0	2	0	0	0	2	0	0	0	0	0	0	0	1	0	0	0	0	2	0	0	1	1	0	1	1	1	0	0	0
924	1	1	0	0	0	0	0	0	0	2	1	1	0	0	0	0	0	0	2	0	2	0	0	0	2	0	0	0	0	0	0	0	0	0	0	0	0	2	0	0	1	1	0	1	1	1	0	0	0
925	1	1	0	0	2	0	0	0	0	1	1	1	0	2	1	2	0	0	0	1	0	0	0	0	0	1	0	1	1	0	0	1	1	0	0	0	0	1	0	0	0	1	0	0	0	1	1	0	0
926	1	1	0	0	0	1	1	1	1	1	1	1	1	1	1	1	0	0	0	2	0	0	0	0	0	2	0	0	0	0	2	0	1	0	0	0	0	2	0	1	1	2	0	2	0	0	1	0	0
927	0	2	0	0	0	2	2	2	0	2	1	1	1	1	0	1	0	0	0	1	0	0	0	0	2	0	0	0	0	0	1	0	0	0	0	0	1	0	0	2	1	1	0	1	1	1	1	0	0
928	0	2	0	0	0	1	1	1	0	2	1	2	0	1	0	2	0	0	0	0	0	0	0	0	0	2	0	0	0	0	1	1	0	0	0	0	2	0	0	1	1	1	0	0	1	1	0	0	2
929	0	1	1	1	2	2	2	2	0	0	0	0	2	1	0	2	0	0	1	1	1	0	2	2	0	0	0	0	0	1	1	0	1	1	0	0	1	0	0	2	0	0	0	1	1	1	1	0	0
930	1	1	0	0	0	1	1	1	0	0	0	0	2	1	0	2	0	0	0	1	0	0	1	1	0	0	0	0	0	0	0	1	0	0	0	0	1	0	0	1	0	0	0	0	2	2	0	0	0
931	1	1	0	0	0	0	0	0	0	1	1	1	1	2	0	0	0	0	2	0	2	0	0	0	2	0	0	0	0	0	0	0	0	0	0	0	1	0	0	0	0	1	0	0	1	1	1	1	0
932	0	2	0	0	0	1	0	1	0	2	1	1	1	1	0	0	0	0	1	0	1	0	1	1	1	0	0	0	0	0	0	0	1	0	0	0	1	0	0	1	0	0	0	1	1	1	1	1	0
933	2	0	0	0	0	0	0	0	0	1	0	0	1	2	0	0	0	0	1	0	1	2	0	0	0	0	0	0	0	1	0	1	0	0	0	0	1	1	0	2	0	1	1	1	1	1	0	0	1
934	0	1	1	1	1	1	1	1	1	1	1	0	2	2	1	1	0	0	0	1	0	0	0	0	0	2	0	1	1	0	1	2	0	0	0	0	1	1	0	2	1	1	1	1	1	1	0	0	1
935	0	2	0	0	0	0	0	0	0	2	1	1	1	1	0	2	2	2	2	0	2	0	0	0	0	2	0	0	0	0	1	0	0	0	0	0	1	0	0	1	0	0	0	1	1	1	2	0	0
936	0	1	0	0	2	0	0	0	0	2	0	1	1	1	0	0	0	0	2	0	2	0	0	0	2	0	0	0	0	0	0	0	0	0	0	0	1	0	0	1	0	0	0	1	1	1	2	0	0
937	0	2	0	0	2	0	0	0	0	2	2	1	1	1	1	0	0	0	1	0	1	0	0	0	2	0	0	0	0	0	0	0	0	0	0	0	0	1	0	0	1	2	0	1	0	0	1	0	0
938	0	2	0	0	2	0	0	0	0	2	2	1	1	1	1	0	0	0	1	0	1	0	0	0	2	0	0	0	0	0	0	0	0	0	0	0	0	1	0	0	1	2	0	1	0	0	1	0	0
939	1	1	0	0	2	0	0	0	0	1	1	0	1	1	1	0	0	0	1	0	1	0	0	0	1	0	0	0	0	0	0	1	1	0	0	0	0	1	0	0	1	0	0	0	2	2	0	0	2
940	1	1	0	0	2	0	0	0	0	1	1	0	1	0	0	0	0	0	1	0	1	0	0	0	1	0	0	0	0	0	0	0	0	0	0	0	0	2	0	0	1	0	0	0	2	2	0	0	1
941	0	1	1	1	2	1	1	1	1	2	2	1	1	1	0	2	0	0	1	1	1	0	0	0	0	2	0	0	0	0	1	0	1	0	0	0	1	1	0	0	0	0	0	1	1	1	1	0	0
942	0	1	1	1	2	1	1	1	1	0	0	2	0	0	0	2	0	0	1	1	1	0	0	0	1	1	0	0	0	0	1	1	0	0	0	0	1	1	0	0	0	0	0	1	1	1	1	0	0
943	0	2	0	0	0	1	1	1	0	2	2	2	0	1	1	0	1	1	2	0	2	0	1	1	0	1	0	1	1	0	0	1	0	0	0	0	0	0	0	0	0	0	0	1	1	1	1	0	0
944	1	0	0	0	2	2	2	2	0	1	2	0	0	1	0	0	1	1	0	2	0	0	0	0	1	1	0	0	0	0	0	0	0	0	0	0	1	0	0	1	0	0	0	2	0	0	2	0	0
945	0	0	1	2	2	0	0	0	0	2	1	0	2	0	0	1	1	1	2	0	2	0	1	1	1	0	0	0	0	1	1	0	1	0	0	0	0	0	0	2	0	1	0	1	0	0	2	0	0
946	0	2	0	0	0	0	0	0	0	1	2	0	2	0	0	1	1	1	2	0	2	0	0	0	0	1	0	0	0	0	1	0	0	0	0	0	1	0	0	1	0	1	0	1	0	0	1	1	0
947	0	2	0	0	2	1	1	1	1	0	1	1	1	0	0	0	1	1	1	0	0	0	0	0	1	1	0	0	0	0	1	1	1	0	0	0	2	0	0	0	0	0	0	0	1	2	2	0	0
948	0	2	0	0	2	2	2	2	2	0	1	1	1	0	0	0	2	2	1	0	1	0	0	0	1	1	0	0	0	0	1	0	1	0	0	0	1	0	0	0	0	0	0	0	1	2	2	0	0
949	0	1	2	2	2	0	0	0	0	2	2	1	1	1	0	1	2	2	1	1	1	0	0	0	0	2	0	0	0	0	2	0	0	0	0	0	1	1	0	2	0	2	0	0	0	0	0	0	0
950	0	2	0	0	1	1	1	1	1	1	1	1	1	0	0	0	2	2	1	1	1	0	0	0	0	2	0	0	0	0	1	1	1	0	0	0	0	1	0	0	1	0	0	1	1	1	2	0	1
951	0	1	1	1	1	1	1	1	1	1	1	0	2	2	1	1	0	0	0	1	0	0	0	0	0	2	0	1	1	0	1	1	0	0	0	0	1	1	0	2	1	1	1	1	1	1	0	0	1
952	0	0	2	2	2	1	1	1	1	2	2	1	0	2	1	2	0	0	0	1	0	0	0	0	0	2	0	2	2	0	0	1	1	0	0	0	0	2	0	1	0	1	1	1	0	1	1	0	0
953	1	1	0	0	1	0	0	0	0	2	2	0	2	2	0	2	0	0	1	1	1	0	0	0	0	2	0	0	0	0	1	0	1	0	0	0	1	1	0	0	0	0	0	1	1	1	1	0	0
954	0	1	1	1	2	1	1	1	1	2	2	1	1	1	0	2	0	0	1	1	1	0	0	0	0	2	0	0	0	0	1	0	1	0	0	0	1	1	0	0	0	0	0	1	1	1	1	0	0
955	0	2	0	0	2	0	0	0	0	2	2	1	1	1	1	1	0	0	1	0	1	0	0	0	2	0	0	0	0	0	0	0	0	0	0	0	0	1	0	0	1	2	0	1	0	0	1	0	1
956	0	2	0	0	1	0	0	0	0	2	2	1	1	1	1	0	0	0	1	0	1	0	0	0	1	1	0	1	1	0	0	1	0	0	0	0	0	0	0	0	0	2	1	2	0	0	2	0	0
957	0	2	0	0	2	0	0	0	0	1	2	0	1	1	0	2	0	0	1	0	1	0	0	0	2	0	0	0	0	0	1	0	2	0	0	0	0	1	0	1	1	1	0	0	1	2	0	0	1
958	0	2	0	0	2	0	0	0	0	1	2	1	1	1	0	1	0	0	1	0	1	0	0	0	2	0	0	0	0	0	1	0	1	0	0	0	0	1	0	1	1	1	0	0	1	2	0	0	1
959	1	0	1	1	0	0	0	0	0	1	1	2	0	1	1	1	0	0	1	0	1	0	2	2	0	0	0	0	0	0	0	0	0	0	0	0	1	0	0	0	0	0	0	1	1	1	1	0	0
960	2	0	0	0	0	1	1	1	0	0	0	1	1	1	0	1	0	0	2	0	2	0	0	0	0	1	0	0	0	0	0	2	0	0	0	0	1	1	0	1	1	0	0	1	1	1	1	0	0
961	1	0	1	1	1	0	0	0	0	1	2	0	1	1	0	0	0	0	2	0	2	0	0	0	0	2	0	0	0	0	1	1	0	0	0	0	0	2	0	1	0	1	1	1	1	1	1	0	0
962	0	2	0	0	0	1	1	1	0	2	2	1	0	0	0	0	0	0	0	1	0	0	1	1	1	0	0	0	0	0	1	0	0	0	0	0	1	0	0	1	1	1	0	1	1	1	1	0	1
963	0	2	0	0	0	2	2	2	1	2	2	0	1	1	1	1	0	0	0	2	0	0	0	0	0	2	0	0	0	0	2	0	1	0	0	0	0	2	0	1	1	2	0	2	0	0	1	0	0
964	0	2	0	0	0	2	2	2	2	2	2	0	1	1	1	1	0	0	0	2	0	0	0	0	0	1	0	0	0	0	1	0	1	0	0	0	0	2	0	1	1	2	0	2	0	0	1	0	0
965	0	0	2	2	2	0	0	0	0	1	0	0	2	1	0	0	1	1	2	0	2	0	0	0	1	0	0	0	0	0	0	0	1	0	0	0	0	0	0	2	0	0	0	1	1	1	1	0	1
966	0	1	0	2	2	0	0	0	0	2	0	1	1	1	0	1	1	1	2	0	2	0	0	0	2	0	0	0	0	0	0	0	0	0	0	0	1	0	0	1	0	0	0	1	1	1	2	0	0
967	1	1	0	0	0	0	0	0	0	2	1	0	0	0	0	0	0	0	1	0	1	0	0	0	2	0	0	0	0	0	0	0	0	0	0	0	1	1	0	0	1	0	0	0	2	2	0	0	0
968	0	2	0	0	0	0	0	0	0	2	1	0	0	0	0	0	0	0	2	0	2	0	0	0	2	0	0	0	0	0	0	0	2	0	0	0	1	1	1	0	0	2	0	2	0	0	1	0	0
969	0	2	0	0	2	2	2	2	2	2	2	0	2	2	0	1	1	1	1	1	1	0	0	0	1	1	0	0	0	0	0	0	2	0	0	0	1	1	0	1	0	1	0	0	1	1	1	0	0
970	0	2	0	0	2	2	2	2	2	1	1	1	1	1	0	0	0	0	0	1	0	0	0	0	1	1	0	0	0	0	0	1	0	0	0	0	0	2	0	0	0	0	0	0	1	2	1	0	0
971	0	1	1	1	0	1	2	2	1	1	1	1	1	0	0	2	1	1	2	0	2	0	0	0	0	2	0	0	0	0	1	0	0	0	0	0	1	0	0	0	0	1	0	1	0	0	1	0	0
972	0	1	2	2	0	1	1	1	1	1	1	1	1	0	0	0	0	0	0	0	0	0	2	2	0	0	0	0	0	0	0	0	0	0	0	0	1	0	0	2	0	1	0	0	1	1	2	0	0
973	0	2	0	0	2	1	1	1	1	1	1	2	0	1	1	2	0	0	1	0	0	0	0	0	2	0	0	0	0	0	0	1	0	0	0	0	2	0	0	0	0	1	0	0	0	1	1	0	0
974	0	2	0	0	2	1	1	1	1	1	1	2	0	1	1	0	0	0	1	0	1	0	0	0	2	0	0	0	0	0	0	1	0	0	0	0	1	1	0	0	0	1	0	0	0	1	1	0	0
975	0	1	0	0	1	1	1	1	0	2	2	1	0	2	1	0	1	0	1	1	1	0	0	0	1	1	0	1	1	0	0	2	0	0	0	0	1	1	0	0	0	0	0	2	0	0	1	0	0
976	0	2	0	0	0	1	1	1	0	2	2	1	0	1	1	0	1	1	2	0	2	0	1	1	0	1	0	1	1	0	0	1	0	0	0	0	1	0	0	1	0	0	0	2	0	0	1	0	0
977	2	0	0	0	2	1	1	1	0	2	2	0	2	1	0	0	0	0	1	0	1	0	1	1	1	0	0	0	0	0	1	2	2	0	0	0	0	0	0	2	0	1	0	1	1	1	0	1	1
978	1	1	0	0	1	0	0	0	0	1	0	1	1	1	0	1	0	0	1	0	1	0	1	1	0	0	0	0	0	0	1	2	2	0	0	0	0	0	0	0	0	1	0	1	1	1	0	1	0
979	2	0	2	2	2	1	1	1	1	0	0	0	2	1	0	0	0	0	2	0	2	0	0	0	0	0	0	0	0	0	0	0	2	0	0	0	1	0	0	2	0	1	0	0	1	1	1	0	1
980	1	0	0	0	2	0	0	0	0	0	1	0	2	1	0	1	0	0	1	1	1	0	0	0	0	1	0	0	0	0	0	2	2	0	0	0	1	0	0	0	0	0	0	1	1	1	2	0	0
981	1	1	0	0	2	2	2	2	0	2	2	0	1	1	0	1	0	0	1	1	1	0	1	1	0	1	0	0	0	0	0	0	1	0	0	0	1	1	0	0	0	0	0	0	1	2	1	1	0
982	2	0	0	0	2	2	2	2	0	1	2	0	1	2	0	2	0	0	2	0	2	0	1	1	1	0	0	0	0	0	1	0	0	0	0	0	0	1	0	2	1	0	0	0	1	2	0	0	0
983	1	1	0	0	0	0	0	0	0	1	1	0	2	2	0	0	0	0	2	0	2	0	0	0	2	0	0	0	0	0	0	0	0	0	0	0	0	0	0	0	0	1	0	0	1	1	1	1	0
984	0	2	0	0	0	1	1	1	1	2	1	0	2	1	0	0	0	0	1	0	1	0	1	1	1	0	0	0	0	0	0	0	1	0	0	0	1	0	0	1	0	0	0	1	1	1	1	1	0
985	0	2	0	0	1	0	0	0	0	1	1	1	1	1	1	0	2	2	2	0	2	0	1	1	0	1	0	0	0	0	1	2	0	0	0	0	0	1	0	0	0	0	0	1	1	1	1	0	0
986	0	2	0	0	1	1	1	1	1	1	1	1	1	1	1	0	2	2	2	0	2	0	1	1	0	1	0	0	0	0	1	2	0	0	0	0	0	1	0	0	0	0	0	1	1	1	1	0	0
987	0	2	0	0	0	2	2	2	2	1	1	1	1	1	0	1	0	0	1	1	1	0	0	0	1	1	0	0	0	0	0	0	2	0	0	0	0	2	0	0	1	0	0	0	1	2	2	0	0
988	0	2	0	0	0	2	2	2	2	1	0	1	1	1	0	0	0	0	1	1	1	0	1	1	0	1	0	0	0	0	0	0	1	0	0	0	0	1	0	0	0	0	0	0	1	2	0	0	0
989	0	0	2	2	2	0	0	0	0	1	1	0	1	0	0	0	0	0	1	0	1	0	1	1	1	0	1	0	0	2	1	1	1	1	1	1	1	0	0	1	0	1	0	0	1	1	2	0	1
990	0	1	0	0	2	0	0	0	0	2	2	0	1	1	0	2	0	0	1	0	1	0	1	1	1	0	0	0	0	1	1	0	2	0	0	0	1	0	0	0	1	1	0	0	1	1	0	1	1
991	1	0	1	1	0	1	1	1	0	1	1	2	0	2	1	0	1	1	1	1	1	0	0	0	0	2	0	0	0	0	1	1	0	0	0	0	1	1	0	0	1	1	0	1	0	0	0	0	0
992	0	0	2	2	0	0	0	0	0	2	2	2	0	2	1	1	0	0	2	0	2	0	2	2	0	0	0	0	0	0	0	1	0	0	0	0	1	1	0	0	0	1	1	2	0	0	0	0	0
993	0	2	0	0	2	2	2	2	2	1	1	0	2	0	0	2	1	1	1	1	1	0	0	0	0	2	0	0	0	0	1	2	0	0	0	0	0	2	0	0	0	0	0	0	2	2	1	1	0
994	1	1	0	0	2	0	0	0	0	0	1	0	2	1	0	1	1	2	2	0	2	0	0	0	1	1	0	0	0	0	2	1	0	0	0	0	1	1	0	1	0	0	0	0	2	2	1	0	0
995	0	1	1	1	0	2	2	2	2	1	1	1	1	2	1	0	0	0	0	0	0	0	0	0	1	0	0	0	0	0	0	1	1	0	0	0	1	1	0	1	0	0	0	1	0	1	1	0	0
996	0	1	1	1	0	2	2	2	2	0	0	1	1	2	1	0	0	0	1	1	1	0	0	0	0	2	0	1	1	0	0	1	1	0	0	0	1	1	0	1	0	0	0	0	2	2	1	0	0
997	1	0	0	0	2	1	1	1	1	0	1	0	2	1	1	0	0	0	0	1	0	0	0	0	0	1	0	1	1	0	0	1	0	0	0	0	0	1	0	1	0	1	1	1	1	1	0	0	0
998	1	0	1	1	2	1	1	1	1	0	1	0	2	1	1	1	0	0	0	1	0	0	0	0	0	1	0	1	1	0	0	1	1	0	0	0	0	1	0	1	0	1	1	1	1	1	0	0	0
999	0	2	0	0	1	1	1	1	0	1	1	0	1	1	0	2	0	0	0	2	0	0	1	1	0	0	0	0	0	1	2	0	0	0	0	0	1	0	1	1	1	1	0	1	1	1	1	0	0
1000	0	2	0	0	1	1	1	1	0	1	1	0	1	1	0	1	0	0	0	2	0	0	1	1	0	1	0	0	0	1	2	1	1	0	0	0	1	0	1	2	0	1	0	1	1	1	1	0	0
1002	0	2	0	0	2	0	0	0	0	1	1	0	1	1	1	2	1	1	1	1	1	0	0	0	2	0	0	0	0	0	1	0	2	0	0	0	0	0	0	1	1	2	0	0	0	0	0	1	1
1003	0	1	1	1	1	2	2	2	1	1	1	1	0	1	1	1	0	0	0	0	0	0	0	0	1	0	0	0	0	0	0	1	0	0	0	0	1	1	0	1	0	0	0	1	0	1	1	0	0
1004	0	1	1	1	1	2	2	2	1	1	1	1	0	1	1	1	0	0	0	1	0	0	0	0	0	1	0	0	0	0	0	0	0	0	0	0	1	1	0	1	0	0	0	1	1	1	1	0	0
1005	0	1	1	1	2	2	2	2	2	0	0	2	0	1	1	0	0	0	1	0	1	0	0	0	1	1	0	1	1	0	0	2	0	0	0	0	0	2	0	0	0	0	0	0	1	2	1	0	0
1006	0	1	1	1	0	2	2	2	1	2	2	0	1	2	1	0	0	0	0	1	0	0	0	0	0	1	0	0	0	0	0	0	1	0	0	0	1	1	0	1	0	0	0	1	1	1	1	0	0
1007	0	2	0	0	2	0	0	0	0	1	1	0	1	1	1	2	0	0	0	2	0	0	0	0	2	0	0	0	0	0	0	0	1	0	0	0	1	0	0	0	1	1	0	0	1	1	0	1	1
1008	1	1	0	0	0	0	0	0	0	1	2	0	1	1	1	0	0	0	1	1	1	0	0	0	2	0	0	0	0	0	1	0	2	0	0	0	1	0	0	1	0	1	0	0	1	1	0	0	0
1009	2	0	1	1	0	0	0	0	0	2	2	0	2	0	0	0	2	2	2	0	2	0	0	0	2	0	0	0	0	0	0	0	0	0	0	0	0	0	0	2	0	0	0	2	0	0	2	0	0
1010	1	1	0	0	0	0	0	0	0	1	1	0	1	1	0	1	1	1	1	0	1	0	0	0	1	1	0	0	0	0	1	1	0	0	0	0	0	1	0	1	1	0	0	1	1	1	1	0	0
1011	0	0	0	0	0	0	0	0	0	2	2	2	0	0	0	0	0	0	1	0	1	0	0	0	2	0	0	0	0	0	2	0	0	0	0	0	2	0	0	2	0	1	0	1	0	0	2	0	0
1012	1	1	0	0	0	0	0	0	0	2	1	1	1	0	0	0	2	1	1	1	1	0	0	0	1	1	0	0	0	0	0	1	0	0	0	0	0	0	0	1	1	1	0	1	0	0	2	0	0
1013	0	1	1	1	0	0	0	0	0	2	1	2	0	0	0	0	0	0	1	0	0	0	1	1	1	0	0	0	0	0	0	0	1	0	0	0	0	2	0	2	0	1	0	1	1	1	1	0	0
1014	2	0	0	0	0	0	0	0	0	2	1	1	1	1	0	0	0	0	0	0	0	0	1	1	1	0	0	0	0	0	0	0	0	0	0	0	2	0	0	2	0	0	0	0	2	2	1	0	0
1015	1	1	0	0	2	0	0	0	0	2	2	0	2	1	0	2	0	0	1	1	1	0	0	0	1	1	0	0	0	0	0	1	0	0	0	0	0	1	0	0	0	1	0	1	1	1	1	1	0
1016	1	1	0	0	2	0	0	0	0	0	1	0	2	2	0	2	0	0	1	0	1	0	1	1	0	0	0	0	0	0	1	0	0	0	0	0	1	0	0	2	0	0	0	1	1	1	1	1	0
1017	1	0	0	0	1	0	0	0	0	0	0	2	0	0	0	2	1	1	1	0	0	0	1	1	1	0	0	0	0	0	1	0	1	1	1	1	0	2	0	0	1	1	0	0	0	1	0	0	0
1018	0	2	0	0	2	2	2	2	0	2	0	0	0	0	0	2	0	0	0	0	0	0	0	0	0	2	0	0	0	0	0	0	1	2	0	0	0	0	0	0	2	2	0	0	0	0	0	0	0
1019	0	2	0	0	2	0	0	0	0	1	2	0	0	1	1	1	0	0	1	1	1	0	0	0	2	0	0	0	0	1	1	0	1	0	0	0	1	1	0	0	1	1	0	0	1	1	1	1	0
1020	1	1	0	0	2	0	0	0	0	0	0	1	1	1	1	0	0	0	1	0	1	0	1	1	0	0	0	0	0	0	0	0	1	0	0	0	0	1	0	1	0	1	0	0	1	1	2	0	0
1021	1	1	0	0	2	0	0	0	0	0	0	1	1	1	1	0	0	0	1	0	1	0	1	1	0	0	0	0	0	0	0	0	1	1	0	0	0	1	0	0	0	0	0	0	2	2	1	0	1
1022	0	1	2	2	0	1	1	1	0	2	1	2	0	2	2	2	0	0	0	2	0	0	0	0	0	0	0	0	0	0	0	0	2	0	0	0	1	0	0	0	0	1	0	1	0	0	1	0	0
1023	0	2	0	0	0	2	2	2	0	1	1	1	0	1	1	2	0	0	0	2	0	0	0	0	0	1	0	1	1	0	0	0	1	0	0	0	1	0	0	0	0	1	0	0	1	1	0	0	0
1024	1	0	1	1	0	1	1	1	1	0	1	1	0	2	1	0	0	0	1	0	1	0	0	0	0	2	0	0	0	0	1	2	1	0	0	0	0	1	0	0	0	0	0	0	2	2	0	0	1
1025	1	0	1	1	0	1	1	1	1	0	1	1	1	2	1	0	0	0	2	0	2	0	0	0	1	1	0	1	1	0	0	2	0	0	0	0	1	1	0	0	1	0	0	1	1	1	1	0	1
1026	1	0	1	1	0	1	1	1	1	0	1	0	1	2	1	0	0	0	2	0	2	0	0	0	1	1	0	1	1	0	0	2	0	0	0	0	1	1	0	0	1	0	0	1	1	1	1	0	1
1027	1	0	1	1	0	1	1	1	1	0	1	1	0	2	1	0	0	0	1	0	1	0	0	0	0	2	0	1	1	0	1	2	1	0	0	0	0	1	0	0	0	0	0	0	2	2	0	0	1
1028	1	1	0	0	0	1	1	1	0	1	1	1	1	0	0	2	2	2	1	0	0	1	0	0	1	0	0	0	0	1	0	0	1	0	0	0	1	0	0	1	1	1	1	1	1	1	0	0	0
1029	0	1	1	1	0	0	0	0	0	1	2	0	1	1	0	2	2	2	1	0	0	1	0	0	1	0	0	0	0	1	0	0	1	0	0	0	1	0	0	1	1	1	1	1	1	1	0	0	0
1030	0	1	1	1	0	1	1	1	0	1	1	1	1	1	0	1	1	1	0	0	0	0	0	0	1	0	1	0	0	1	0	1	1	0	0	0	0	0	0	1	1	2	1	1	0	0	0	0	1
1031	0	1	1	1	0	1	1	1	0	1	1	1	1	1	0	1	0	0	0	0	0	0	0	0	1	0	1	0	0	1	0	1	1	0	0	0	0	0	0	1	1	2	1	1	0	0	0	0	1
1032	0	2	0	0	0	1	1	1	0	1	2	2	0	2	1	0	0	0	1	1	1	0	0	0	2	0	1	0	0	1	0	0	0	0	0	0	1	1	0	0	1	1	0	0	1	1	0	0	0
1033	2	0	0	0	1	1	1	1	1	1	1	0	2	1	0	2	1	1	2	0	2	0	1	1	0	0	0	0	0	0	0	0	1	2	0	0	0	2	0	2	0	1	0	0	1	1	2	0	0
1034	2	0	0	0	2	0	0	0	0	0	1	1	1	0	0	0	0	0	0	1	0	0	1	1	0	1	0	0	0	0	0	0	0	1	1	1	0	0	0	0	0	0	0	1	1	1	2	0	0
1035	2	0	0	0	1	0	0	0	0	0	1	0	1	1	0	2	0	0	1	1	1	0	0	0	0	2	0	0	0	0	0	1	0	1	0	0	0	1	0	0	0	0	0	1	1	1	1	0	0
1036	0	2	0	0	2	1	1	1	1	2	2	0	2	0	0	0	1	1	2	0	2	0	1	1	1	0	0	0	0	0	1	1	2	0	0	0	1	0	0	2	0	2	0	0	0	0	1	0	0
1037	0	2	0	0	2	2	2	2	1	2	2	0	2	1	0	0	0	0	1	1	1	0	1	1	0	1	0	1	1	0	0	1	1	0	0	0	1	0	0	2	0	2	0	0	0	0	1	0	0
1038	0	2	0	0	2	1	1	1	0	1	1	0	2	1	0	0	0	0	0	2	0	0	1	1	0	1	0	1	1	0	1	1	0	0	0	0	1	0	0	0	1	1	0	1	1	1	0	0	0
1039	0	2	0	0	2	2	2	2	1	2	2	0	2	0	0	1	1	1	1	1	1	0	1	1	1	0	0	0	0	0	2	1	1	0	0	0	1	0	0	1	1	2	0	1	0	0	0	0	0
1040	1	1	0	0	2	0	0	0	0	0	1	0	2	2	0	0	0	0	2	0	2	0	0	0	2	0	0	0	0	0	0	0	0	0	0	0	1	0	0	2	0	1	0	1	1	1	2	0	0
1041	0	2	0	0	2	0	0	0	0	1	1	0	2	1	0	2	0	0	0	1	0	0	0	0	0	2	0	0	0	0	0	0	0	0	0	0	1	0	0	1	0	0	0	1	1	1	0	2	0
1042	1	1	0	0	0	1	1	1	1	0	0	1	0	1	1	2	0	0	0	2	0	0	0	0	0	1	0	0	0	0	1	0	1	0	0	0	0	0	0	0	0	1	0	1	0	0	1	0	0
1043	0	2	0	0	0	1	2	2	1	0	0	0	0	1	1	2	0	0	0	2	0	0	0	0	0	2	0	1	1	0	1	0	1	0	0	0	1	0	0	0	0	1	0	1	1	1	0	0	0
1044	0	2	0	0	1	0	0	0	0	2	2	1	1	0	0	2	2	1	1	1	1	0	1	1	0	1	0	0	0	0	2	0	2	0	0	0	1	0	0	1	0	0	0	0	2	2	2	0	0
1045	0	2	0	0	1	1	1	1	1	2	1	1	1	0	0	2	1	1	2	0	2	0	0	0	0	1	0	0	0	0	1	0	2	1	1	1	1	0	0	0	0	2	0	0	0	0	0	1	1
1046	0	2	0	0	1	1	1	1	0	1	2	1	1	0	0	2	1	1	1	1	1	0	1	1	0	1	0	0	0	0	2	0	2	0	0	0	1	0	0	1	0	0	0	0	2	2	2	0	1
1047	0	2	0	0	1	1	1	1	1	2	1	1	1	0	0	1	1	1	2	0	2	0	0	0	0	1	0	0	0	0	1	0	2	1	1	1	1	0	0	0	0	2	0	0	0	0	0	1	1
1048	1	0	1	1	1	1	1	1	1	2	1	1	1	1	1	2	0	0	1	0	1	0	1	1	0	1	0	1	1	0	0	0	0	0	0	0	0	1	0	2	0	1	0	1	0	0	1	1	0
1049	2	0	0	0	0	0	0	0	0	0	0	2	0	0	0	2	0	0	1	0	1	1	2	2	0	0	0	0	0	2	0	0	0	0	0	0	0	1	0	2	0	1	0	1	0	0	1	1	0
1050	1	1	0	0	0	2	2	2	0	1	0	1	1	0	0	1	0	0	0	0	0	0	0	0	2	0	1	0	0	1	0	0	1	0	0	0	0	0	0	1	1	2	1	1	0	0	0	0	1
1051	1	1	0	0	0	1	1	1	0	1	1	0	1	0	0	1	1	1	1	0	0	1	0	0	1	0	0	0	0	1	0	0	1	0	0	0	1	0	0	1	1	2	1	1	0	0	0	0	1
1052	0	1	1	1	0	0	0	0	0	1	2	1	1	1	0	1	1	1	1	0	0	1	0	0	0	0	0	0	0	1	0	1	1	0	0	0	1	0	0	1	1	2	1	1	0	0	0	0	1
1053	1	1	0	0	0	1	1	1	0	1	1	0	1	0	0	1	0	0	0	0	0	0	0	0	2	0	1	0	0	1	0	0	1	0	0	0	0	0	0	1	1	2	1	1	0	0	0	0	1
1054	0	2	0	0	1	0	0	0	0	1	2	1	1	0	0	2	1	1	2	0	2	0	0	0	0	1	0	0	0	0	1	0	2	0	0	0	1	0	0	1	0	1	0	0	1	1	1	0	0
1055	0	2	0	0	1	1	1	1	0	1	2	1	1	0	0	2	1	1	1	1	1	0	1	1	0	1	0	0	0	0	2	0	1	0	0	0	1	0	0	1	0	0	0	0	2	2	2	0	0
1056	0	2	0	0	1	0	0	0	0	1	2	1	1	0	0	2	1	1	2	0	2	0	0	0	0	1	0	0	0	0	1	0	2	1	1	1	1	0	0	0	0	1	0	0	1	1	1	0	1
1057	1	1	0	0	2	0	0	0	0	2	1	1	0	1	0	0	0	0	0	0	0	0	1	1	1	0	0	0	0	0	0	1	1	1	1	1	0	2	0	1	1	0	0	0	1	2	1	0	0
1058	2	0	0	0	2	0	0	0	0	1	1	1	0	1	0	1	0	0	1	0	1	0	2	2	0	0	0	0	0	0	0	0	1	1	0	0	0	0	0	2	0	0	0	1	1	1	2	0	0
1059	1	0	1	1	2	0	0	0	0	1	1	1	0	0	0	1	0	0	2	0	2	0	1	1	0	1	0	0	0	0	1	0	1	1	0	0	1	0	0	2	0	0	0	2	0	0	1	1	0
1060	1	0	1	1	2	0	0	0	0	1	1	1	0	0	0	0	0	0	2	0	2	0	1	1	0	1	0	0	0	0	1	0	1	1	1	1	1	0	0	2	0	0	0	2	0	0	1	1	0
1061	2	0	0	0	2	0	0	0	0	1	1	0	1	1	0	1	0	0	1	0	1	0	2	2	0	0	0	0	0	0	0	0	1	1	0	0	0	0	0	2	0	0	0	1	1	1	2	0	0
1062	2	0	0	0	2	0	0	0	0	1	1	0	1	1	0	1	0	0	1	0	1	0	2	2	0	0	0	0	0	0	0	0	1	1	0	0	0	0	0	2	0	0	0	1	1	1	2	0	0
1063	2	0	0	0	2	0	0	0	0	1	1	0	1	1	0	1	0	0	1	0	1	0	2	2	0	0	0	0	0	0	0	0	1	1	0	0	0	0	0	2	0	0	0	1	1	1	2	0	0
1064	1	1	0	0	2	0	0	0	0	2	1	0	1	1	0	0	0	0	0	0	0	0	1	1	1	0	0	0	0	0	0	1	1	1	1	1	0	2	0	1	1	0	0	0	1	2	1	0	0
1065	0	2	0	0	0	0	0	0	0	2	1	1	0	2	1	0	0	0	1	1	1	0	0	0	1	1	2	0	0	2	0	0	1	0	0	0	1	1	0	0	1	0	0	0	2	2	1	0	0
1066	0	2	0	0	1	0	0	0	0	2	2	1	0	2	2	0	0	0	1	1	1	0	0	0	2	1	0	1	1	0	0	0	0	0	0	0	0	0	0	0	2	2	0	0	0	0	1	1	0
1067	0	1	1	1	1	2	2	2	1	1	1	1	0	1	1	0	0	0	0	0	0	0	0	0	1	0	0	0	0	0	0	1	0	0	0	0	1	1	0	1	0	0	0	1	0	1	1	0	0
1068	0	1	1	1	0	2	2	2	2	1	1	2	0	1	1	1	0	0	1	1	1	0	0	0	0	2	0	1	1	0	0	1	0	0	0	0	0	2	0	0	0	0	0	0	2	2	1	0	0
1069	0	1	1	1	0	2	2	2	1	2	2	0	1	2	1	0	0	0	1	1	1	0	0	0	0	2	0	1	1	0	0	1	1	0	0	0	0	2	0	0	0	0	0	0	2	2	1	0	0
1070	0	2	0	0	0	1	1	1	1	2	2	1	1	0	0	2	2	2	2	0	2	0	0	0	2	0	0	0	0	0	1	0	2	2	2	2	1	0	0	1	0	2	0	0	0	0	0	0	1
1071	0	2	0	0	0	0	0	0	0	2	2	1	1	0	0	2	2	2	2	0	2	0	0	0	0	0	0	0	0	0	1	0	2	0	0	0	1	0	0	0	0	2	0	0	0	0	0	0	0
1072	0	2	0	0	1	2	2	2	1	1	1	0	2	0	0	0	0	0	0	2	0	0	1	1	0	1	0	0	0	0	1	2	0	0	0	0	0	0	0	2	0	1	0	1	0	1	1	0	0
1073	0	2	0	0	1	2	2	2	1	1	1	0	2	0	0	0	0	0	1	1	1	0	1	1	0	1	0	0	0	0	0	1	0	0	0	0	1	0	0	2	0	1	0	0	0	1	0	0	0
1074	0	2	0	0	2	0	0	0	0	1	1	1	1	0	0	2	0	0	1	1	1	0	0	0	0	1	0	1	1	0	0	0	1	1	1	1	1	0	0	0	0	2	0	0	0	0	0	0	1
1075	0	2	0	0	0	0	0	0	1	2	2	2	0	0	0	2	0	0	2	0	2	0	0	0	1	2	0	0	0	0	1	0	0	1	1	0	1	0	0	0	0	0	0	0	1	1	0	0	1
1076	1	1	0	0	2	1	1	1	1	0	0	0	0	1	1	2	0	0	0	2	0	0	0	0	0	2	0	1	1	0	1	0	1	0	0	0	1	0	0	1	0	1	0	1	1	1	0	0	0
1077	0	1	1	1	0	2	2	2	1	2	2	0	1	2	1	0	0	0	0	1	0	0	0	0	0	1	0	0	0	0	0	0	1	0	0	0	1	1	0	1	0	0	0	1	1	1	1	0	0
1078	0	1	1	1	1	2	2	2	1	1	1	1	0	1	1	0	0	0	0	0	0	0	0	0	1	0	0	0	0	0	0	1	0	0	0	0	1	1	0	1	0	0	0	1	0	1	1	0	0
1079	0	1	1	1	0	2	2	2	1	2	2	0	1	2	1	1	0	0	0	1	0	0	0	0	0	1	0	0	0	0	0	0	1	0	0	0	1	1	0	1	0	0	0	1	1	1	1	0	0
1080	1	1	0	0	2	0	0	0	0	0	2	0	2	0	0	0	0	0	1	1	1	0	1	1	0	1	0	0	0	1	1	0	0	0	0	0	1	0	0	2	0	1	0	1	0	0	2	0	0
1081	1	1	0	0	2	0	0	0	0	0	2	0	2	0	0	0	0	0	1	1	1	0	0	0	0	0	0	0	0	0	0	0	0	0	0	0	0	0	0	1	0	1	0	1	0	0	2	0	0
1082	0	1	1	1	2	1	1	1	1	1	0	1	1	0	0	1	1	1	2	0	2	0	1	1	0	1	0	0	0	0	1	0	2	0	0	0	1	0	0	1	0	0	0	1	1	1	2	0	0
1083	1	1	0	0	2	1	1	1	1	2	0	0	1	0	0	1	1	1	1	0	1	0	0	0	1	1	0	0	0	0	1	0	2	1	1	1	1	0	0	0	1	0	0	0	2	2	1	0	0
1084	1	1	0	0	2	1	1	1	1	2	0	0	1	0	0	0	1	1	1	0	1	0	0	0	1	1	0	0	0	0	1	0	2	1	1	1	1	0	0	0	1	1	0	0	1	1	0	1	0
1085	0	1	1	1	2	1	1	1	1	1	0	1	1	0	0	0	1	1	2	0	2	0	1	1	0	1	0	0	0	0	1	0	2	0	0	0	1	0	0	1	0	1	0	1	0	0	1	1	0
1086	2	0	0	0	2	0	0	0	0	0	1	1	1	0	0	0	0	0	0	1	0	0	1	1	0	1	0	0	0	0	0	0	1	0	0	0	0	0	0	0	0	0	0	1	1	1	0	0	0
1087	0	0	0	2	1	1	1	2	1	1	1	1	1	0	0	2	1	1	2	0	1	0	1	1	1	0	0	0	0	1	2	0	1	0	0	0	2	0	0	0	0	1	0	0	1	1	1	0	0
1088	0	1	0	0	2	1	2	2	0	1	0	1	1	0	0	0	0	0	1	0	1	0	0	0	2	0	1	0	0	2	1	0	1	0	0	0	1	0	0	1	0	1	1	1	1	1	1	0	0
1089	1	1	0	0	2	0	0	0	0	2	0	0	1	1	0	2	1	1	2	0	2	0	0	0	1	0	0	0	0	0	0	2	0	0	0	0	1	1	0	2	0	1	0	0	1	1	0	0	0
1090	1	1	0	0	1	0	0	0	0	0	0	2	0	1	0	2	0	0	1	0	1	0	0	0	0	0	0	0	0	0	0	2	0	2	0	0	1	1	0	0	0	0	0	0	1	2	0	0	0
1091	0	2	0	0	0	1	1	1	0	1	2	2	0	2	1	0	1	1	1	0	1	0	0	0	0	1	0	1	1	0	0	1	0	0	0	0	1	1	0	0	1	1	1	1	1	1	1	0	0
1092	0	2	0	0	0	1	1	1	0	1	2	1	0	2	1	2	1	1	1	0	1	0	0	0	0	1	0	1	1	0	0	1	0	1	0	0	0	0	0	0	0	1	1	1	1	1	1	0	0
1093	0	2	0	0	0	1	1	1	0	1	2	1	0	2	1	2	1	1	1	0	1	0	0	0	0	1	0	1	1	0	0	1	1	1	0	0	0	0	0	0	0	1	1	1	1	1	1	0	0
1094	0	2	0	0	0	0	0	0	0	2	1	1	0	2	1	0	0	0	1	1	1	0	0	0	1	1	1	1	1	1	0	1	1	0	0	0	1	1	0	0	1	1	1	1	1	1	1	0	0
1095	0	2	0	0	2	1	1	1	0	1	1	0	2	1	0	1	0	0	0	2	0	0	1	1	0	1	0	1	1	0	1	1	0	0	0	0	1	0	0	0	1	1	0	1	1	1	0	0	0
1096	0	2	0	0	2	2	2	2	1	2	2	0	2	0	0	0	1	1	1	1	1	0	1	1	1	0	0	0	0	0	2	1	1	0	0	0	1	0	0	1	1	2	0	1	0	0	0	0	0
1097	1	1	1	1	0	0	0	0	0	2	0	2	0	1	0	1	0	0	1	0	1	0	1	1	1	0	0	0	0	0	0	0	0	0	0	0	0	0	0	1	1	1	0	0	1	1	1	0	0
1098	1	1	0	0	0	0	0	0	0	2	0	1	1	1	0	1	0	0	1	0	1	0	1	1	1	0	0	0	0	0	0	0	0	0	0	0	0	0	0	2	0	1	0	0	1	1	1	0	0
1099	1	1	0	0	0	2	2	2	2	0	1	0	0	1	0	0	0	0	1	0	1	0	0	0	0	0	0	0	0	0	0	0	0	0	0	0	0	1	0	0	0	1	1	1	0	1	1	0	1
1100	1	1	0	0	0	0	0	0	0	0	1	0	0	1	0	2	0	0	1	0	1	0	1	1	0	0	0	0	0	0	0	1	0	1	0	0	0	2	0	1	0	0	0	0	1	2	0	0	0
1101	0	2	0	0	0	2	2	2	2	1	1	1	1	1	0	2	0	0	1	0	1	0	1	1	0	0	0	0	0	0	0	0	0	0	0	0	1	1	0	2	1	0	0	1	0	1	1	1	0
1102	0	2	0	0	0	1	1	1	1	1	1	1	1	2	0	0	1	1	0	1	0	0	1	1	1	0	0	1	1	0	0	0	0	0	0	0	1	0	0	2	1	1	0	1	0	0	1	1	0
1103	1	1	0	0	0	0	0	0	0	2	1	2	0	1	0	0	0	0	1	0	1	0	1	1	1	0	0	0	0	0	0	0	1	0	0	0	0	2	0	2	0	1	0	1	1	1	1	0	0
1104	0	2	0	0	0	0	0	0	0	2	1	1	1	1	0	0	0	0	1	0	1	0	1	1	1	0	0	0	0	0	0	0	1	0	0	0	0	1	0	2	0	1	0	2	0	0	0	1	0
1105	1	0	1	1	0	1	1	1	1	0	1	1	0	2	1	0	0	0	1	0	1	0	0	0	0	2	0	1	1	0	1	2	1	0	0	0	0	1	0	0	0	0	0	0	2	2	0	0	1
1106	1	0	1	1	0	1	1	1	0	1	2	0	0	2	1	0	0	0	1	0	1	0	0	0	1	0	0	0	0	0	0	1	1	0	0	0	1	0	0	1	1	0	0	2	0	0	1	0	1
1107	1	0	2	1	0	1	1	1	0	1	2	0	1	2	1	0	0	0	1	0	1	0	0	0	1	0	0	0	0	0	0	1	0	0	0	0	1	0	0	1	1	0	0	2	0	0	1	0	1
1108	1	0	1	1	0	1	1	1	1	0	1	1	1	2	1	0	0	0	2	0	2	0	0	0	1	1	0	1	1	0	0	2	0	0	0	0	1	0	0	1	1	0	0	1	1	1	1	0	1
1109	0	2	0	0	2	0	0	0	0	2	2	0	1	1	1	2	0	0	1	1	1	0	0	0	2	0	0	0	0	0	1	0	2	0	0	0	0	0	0	0	0	2	0	0	0	0	0	1	1
1110	1	1	0	0	0	1	1	1	1	1	2	0	1	0	0	0	1	1	1	1	1	0	0	0	2	0	0	0	0	0	2	0	2	0	0	0	1	1	0	1	1	2	0	0	0	0	0	0	0
1111	0	2	0	0	2	2	2	2	1	2	2	0	2	1	0	1	0	0	1	1	1	0	1	1	0	1	0	1	1	0	0	1	1	0	0	0	1	0	0	1	0	1	0	0	1	1	1	0	0
1112	0	2	0	0	2	1	1	1	0	1	1	0	2	1	0	1	0	0	0	2	0	0	1	1	0	1	0	1	1	0	1	1	0	0	0	0	1	0	0	0	1	1	0	1	1	1	0	0	0
1113	0	2	0	0	2	1	1	1	1	2	2	0	2	0	0	0	1	1	2	0	2	0	1	1	1	0	0	0	0	0	1	1	2	0	0	0	1	0	0	2	0	2	0	0	0	0	1	0	0
1114	0	2	0	0	2	0	0	0	0	1	1	0	2	0	0	1	0	0	1	1	1	0	1	1	0	1	0	1	1	0	0	1	1	0	0	0	1	0	0	1	0	1	0	0	1	1	1	0	0
1115	1	0	2	2	2	0	0	0	0	1	2	0	2	0	0	0	0	0	1	1	1	0	1	1	0	1	0	0	0	1	1	0	1	0	0	0	1	0	0	1	0	2	0	0	0	0	2	0	0
1116	1	1	0	0	2	0	0	0	0	1	2	0	2	0	0	2	1	1	2	0	2	0	1	1	0	0	0	0	0	0	0	0	0	0	0	0	1	0	0	2	0	2	0	0	0	0	1	1	0
1117	1	1	0	0	1	1	1	1	1	0	0	1	0	0	0	2	0	0	1	1	1	1	0	0	0	1	0	1	1	1	0	0	0	0	0	0	0	1	0	1	0	1	1	2	0	0	1	0	0
1118	0	1	1	1	2	2	2	2	2	0	1	0	1	1	1	2	0	0	0	2	0	0	0	0	0	2	0	2	2	0	0	0	0	0	0	0	1	1	0	1	0	0	0	1	1	1	0	1	0
1119	0	1	1	1	2	2	2	2	2	0	1	0	1	1	1	2	0	0	0	2	0	0	0	0	0	2	0	2	2	0	0	0	0	0	0	0	1	1	0	1	0	1	1	1	1	1	0	0	0
1120	0	0	2	2	1	1	1	1	1	2	2	1	1	2	2	2	0	0	0	2	0	0	0	0	0	1	0	0	0	0	0	0	0	0	0	0	0	1	0	1	0	1	1	2	0	0	1	0	0
1121	1	1	0	0	1	2	2	2	2	0	0	1	0	0	0	2	0	0	1	0	1	0	0	0	1	0	0	0	0	0	0	2	0	2	0	0	1	1	0	1	0	0	0	0	1	2	1	0	0
1122	1	1	0	0	0	0	0	0	0	1	0	0	2	2	0	1	0	0	1	0	1	0	0	0	1	0	0	0	0	0	0	2	0	1	0	0	1	0	0	0	0	1	1	1	0	1	1	0	1
1123	1	0	0	1	1	0	0	0	0	1	0	0	2	1	0	0	1	1	2	0	2	0	0	0	2	0	0	0	0	0	0	0	0	0	0	0	1	0	0	1	0	1	0	1	0	0	1	0	0
1124	1	1	0	0	0	0	0	0	0	1	1	0	1	1	0	1	1	1	1	0	1	0	0	0	1	1	0	0	0	0	1	1	0	0	0	0	1	1	0	1	1	0	0	1	1	1	1	0	1
1125	0	1	1	1	2	0	0	0	0	2	1	1	0	0	0	0	0	0	0	0	0	0	1	1	1	0	0	0	0	0	0	1	1	1	1	1	0	2	0	1	1	0	0	0	1	2	1	0	0
1126	1	1	0	0	2	0	0	0	0	2	1	0	1	1	0	0	0	0	1	0	1	0	1	1	1	0	0	0	0	0	0	1	1	1	1	1	1	1	0	1	1	0	0	1	0	1	0	1	0
1127	1	0	1	1	2	0	0	0	0	1	1	0	1	0	0	0	0	0	2	0	2	0	1	1	0	1	0	0	0	0	1	0	1	1	1	1	1	1	0	2	0	0	0	2	0	0	1	1	0
1128	2	0	0	0	2	0	0	0	0	1	1	0	1	1	0	2	0	0	1	0	1	0	2	2	0	0	0	0	0	0	0	0	1	1	0	0	0	0	0	2	0	0	0	0	2	2	2	0	0
1129	1	1	0	0	2	1	1	1	1	0	0	1	0	0	0	1	0	0	0	0	0	0	1	1	1	0	0	0	0	0	0	1	0	0	0	0	1	0	0	0	0	1	1	1	0	1	1	0	1
1130	1	1	0	0	2	0	0	0	0	2	0	0	2	1	0	0	0	0	1	0	1	0	0	0	2	0	0	0	0	0	0	1	0	0	0	0	1	0	0	1	0	2	1	1	0	0	1	0	1
1131	0	2	0	0	0	1	1	1	0	1	2	2	0	2	1	2	1	1	1	0	1	0	0	0	1	0	0	0	0	0	0	0	0	1	0	0	0	1	0	0	0	1	0	0	1	1	0	0	0
1132	0	2	0	0	1	1	1	1	0	1	2	2	0	2	1	1	1	1	1	0	1	0	0	0	1	0	0	0	0	0	0	0	0	1	0	0	0	1	0	0	0	1	0	0	1	1	0	0	0
1133	0	2	0	0	0	1	1	1	0	1	2	2	0	2	1	0	1	1	1	0	1	0	0	0	1	0	0	0	0	0	0	0	0	0	0	0	0	1	0	0	0	1	0	0	1	1	0	0	0
1134	0	2	0	0	0	0	0	0	0	2	1	1	0	2	1	1	0	0	1	1	1	0	0	0	1	1	1	1	1	1	0	1	1	0	0	0	1	0	0	0	1	2	1	1	0	0	1	0	0
1135	1	0	1	1	2	1	1	1	1	0	1	1	1	2	2	2	0	0	0	2	0	0	0	0	0	2	0	1	1	0	1	0	1	0	0	0	0	2	0	2	0	2	1	2	0	0	0	0	0
1136	1	0	1	1	2	1	1	1	1	0	1	1	1	2	2	2	0	0	0	2	0	0	0	0	0	2	0	1	1	0	1	0	1	0	0	0	0	2	0	2	0	2	1	2	0	0	0	0	0
1137	1	0	1	1	2	1	1	1	1	0	1	1	1	2	2	2	0	0	1	1	1	0	0	0	0	2	0	1	1	0	1	0	1	0	0	0	0	2	0	2	0	1	0	2	0	0	0	1	0
1138	1	0	1	1	2	1	1	1	1	0	0	2	0	1	1	2	0	0	0	2	0	0	0	0	0	2	0	1	1	0	1	0	1	0	0	0	1	1	0	1	0	1	0	1	0	0	0	1	0
1139	0	2	0	0	2	0	0	0	0	1	1	0	2	0	0	0	0	0	1	1	1	0	1	1	0	1	0	1	1	0	0	1	1	0	0	0	1	0	0	1	0	1	0	0	1	1	1	0	0
1140	0	2	0	0	2	2	2	2	1	2	2	0	2	1	0	0	1	1	1	1	1	0	1	1	1	0	0	0	0	0	2	1	1	0	0	0	1	0	0	1	1	2	0	1	0	0	0	0	0
1141	0	2	0	0	2	2	2	2	1	2	2	0	2	0	0	1	1	1	1	1	1	0	1	1	1	0	0	0	0	0	2	1	2	0	0	0	1	0	0	1	1	2	0	1	0	0	0	0	0
1142	1	1	0	0	0	2	2	2	0	1	0	1	1	0	0	1	0	0	0	0	0	0	0	0	2	0	1	0	0	1	0	0	1	0	0	0	0	0	0	1	0	2	1	1	0	0	0	0	1
1143	0	1	1	1	2	1	1	1	0	2	0	1	1	1	0	2	0	1	0	0	0	0	0	0	1	0	1	0	0	1	0	1	0	0	0	0	0	0	0	1	0	1	1	1	1	1	0	0	0
1144	0	1	1	1	0	1	1	1	0	1	1	1	1	1	0	1	1	1	1	0	0	1	0	0	1	0	0	0	0	1	0	0	1	0	0	0	0	0	0	1	1	2	1	1	0	0	0	0	1
1145	1	1	0	0	0	2	2	2	0	1	0	1	1	0	0	2	1	1	0	0	0	0	0	0	1	0	1	0	0	1	0	1	1	0	0	0	0	0	0	1	1	1	1	1	1	1	0	0	0
1146	0	1	1	1	0	1	1	1	0	1	1	1	1	1	0	1	0	0	2	0	1	0	2	2	0	0	0	0	0	0	1	0	1	0	0	0	2	0	0	0	0	2	0	0	0	0	1	0	0
1147	0	0	0	0	1	0	0	0	0	1	1	1	1	0	0	0	1	1	2	0	1	0	1	1	1	0	0	0	0	1	2	0	1	0	0	0	1	0	0	0	0	1	0	0	1	1	1	0	0
1148	1	1	0	0	0	1	1	1	1	0	2	0	1	2	0	2	0	0	2	0	2	0	0	0	0	0	0	0	0	0	0	2	0	0	0	0	0	2	0	1	0	0	0	0	0	2	2	0	0
1149	1	1	0	0	0	0	0	0	0	0	1	0	0	1	0	2	0	0	2	0	2	0	0	0	0	0	0	0	0	0	0	2	0	1	0	0	0	2	0	1	0	0	0	0	1	2	1	0	0
1150	0	1	1	1	1	1	1	1	0	1	1	1	1	1	0	2	2	2	1	0	0	1	0	0	0	0	0	0	0	1	0	1	1	0	0	0	1	0	0	1	1	1	1	1	1	1	0	0	0
1151	1	1	0	0	0	2	2	2	0	1	0	0	1	0	0	1	0	0	0	0	0	0	0	0	2	0	1	0	0	1	0	0	1	0	0	0	0	0	0	1	1	2	1	1	0	0	0	0	1
1152	1	1	0	0	0	2	2	2	0	1	0	1	1	0	0	1	0	0	0	0	0	0	0	0	2	0	1	0	0	1	0	0	1	0	0	0	1	0	0	1	0	2	1	1	0	0	0	0	1
1153	0	1	1	1	0	1	1	1	0	1	1	1	1	1	0	1	0	0	0	0	0	0	0	0	2	0	1	0	0	1	0	0	1	0	0	0	0	0	0	1	1	2	1	1	0	0	0	0	1
1154	0	1	0	0	0	1	1	0	0	2	2	2	0	2	2	2	0	0	0	2	0	0	0	0	0	0	0	0	0	0	0	0	0	0	0	0	1	0	0	0	0	1	0	0	1	1	0	0	0
1155	0	2	0	0	0	1	1	1	0	1	2	2	0	2	1	0	2	1	1	0	1	0	0	0	0	1	0	1	1	0	0	1	0	0	0	0	1	0	0	0	1	1	1	1	1	1	1	0	0
1156	0	2	0	0	0	0	0	0	0	2	1	2	0	2	1	0	0	0	1	1	1	0	0	0	1	1	1	1	1	1	0	1	1	0	0	0	1	0	0	0	0	1	1	1	1	1	1	0	0
1157	0	2	0	0	0	0	0	0	0	2	1	1	0	2	1	0	0	0	1	1	1	0	0	0	1	1	1	1	1	1	0	1	1	0	0	0	1	0	0	0	1	1	1	1	1	1	1	0	0
1158	0	2	0	0	0	1	1	1	0	1	2	2	0	2	1	1	0	0	1	1	1	0	0	0	2	0	1	0	0	1	0	0	0	0	0	0	1	1	0	0	1	1	0	0	1	1	0	0	0
1159	2	0	0	0	2	0	0	0	0	0	0	2	0	0	0	1	0	0	1	0	1	1	1	1	0	0	0	0	0	0	0	0	1	1	0	0	0	1	0	1	0	0	0	2	0	0	0	0	1
1160	2	0	0	0	0	0	0	0	0	2	0	2	0	0	0	1	0	1	1	0	1	1	1	1	0	0	0	0	0	1	0	0	0	0	0	0	0	0	0	2	0	2	0	0	0	0	0	2	0
1161	0	2	0	0	0	1	1	1	1	2	2	1	1	0	0	2	0	0	0	2	0	0	0	0	0	1	0	1	1	0	0	0	2	1	1	1	1	0	0	0	0	1	0	0	1	1	0	0	1
1162	0	2	0	0	0	1	1	1	1	2	2	1	1	0	0	2	1	1	2	0	2	0	0	0	1	0	0	0	0	0	1	0	2	1	1	1	1	0	0	1	0	2	0	0	0	0	0	0	1
1163	1	1	0	0	2	0	0	0	0	2	1	1	0	0	0	1	0	0	0	0	0	0	1	1	1	0	0	0	0	0	0	1	1	1	0	0	0	0	0	1	1	0	0	0	1	2	1	0	0
1164	1	0	1	1	2	0	0	0	0	1	1	1	0	0	0	1	0	0	1	0	1	0	2	2	0	0	0	0	0	0	0	0	1	1	0	0	0	0	0	2	0	0	0	1	1	1	2	0	0
1165	0	1	1	1	2	0	0	0	0	2	1	1	0	0	0	0	0	0	1	0	1	0	0	0	1	1	0	0	0	0	1	1	1	1	1	1	1	1	0	1	1	0	0	1	0	1	0	1	0
1166	1	1	0	0	2	0	0	0	0	2	1	0	1	1	0	1	0	0	0	0	0	0	1	1	1	0	0	0	0	0	0	1	1	1	0	0	0	0	0	2	0	0	0	1	1	1	2	0	0
1167	1	1	0	0	2	0	0	0	0	0	0	1	1	1	1	0	0	0	1	0	1	0	1	1	0	0	0	0	0	0	0	1	2	2	0	0	1	0	0	0	0	0	0	0	2	2	1	0	1
1168	1	1	0	0	0	0	0	0	0	1	0	0	2	1	1	1	0	0	0	0	0	0	0	0	0	0	0	0	0	0	0	0	0	0	0	0	0	1	0	0	0	1	0	0	1	1	2	0	0
1169	1	1	0	0	0	0	0	0	0	2	0	2	0	1	0	0	0	0	1	0	1	0	1	1	1	0	0	0	0	0	0	0	0	0	0	0	0	0	0	2	0	1	0	0	1	1	1	0	0
1170	1	1	0	0	0	0	0	0	0	2	0	2	0	0	0	0	0	0	1	0	1	0	1	1	1	0	0	0	0	0	0	0	0	1	0	0	0	0	0	0	0	0	0	0	2	2	0	0	2
1171	1	1	2	2	2	0	0	0	0	0	0	1	0	0	0	2	1	1	2	0	1	0	2	2	0	0	0	0	0	0	1	2	1	1	0	0	0	0	0	1	0	1	0	1	0	0	1	0	0
1172	0	2	0	0	2	2	2	2	0	2	0	1	0	0	0	0	0	0	0	0	0	0	0	0	2	0	1	0	0	1	0	0	0	1	1	1	0	0	0	0	1	1	0	0	0	1	0	0	0
1173	1	1	0	0	2	0	0	0	0	1	0	0	2	1	0	0	0	0	2	0	2	0	0	0	2	0	0	0	0	0	0	2	0	1	0	0	1	1	0	2	0	1	0	0	1	1	0	0	0
1174	1	1	0	0	2	0	0	0	0	1	0	0	1	1	0	2	0	0	1	0	1	0	0	0	1	0	0	0	0	0	0	2	0	1	0	0	0	1	0	0	0	0	0	0	1	2	0	0	0
1175	1	1	0	0	0	1	1	1	1	0	0	1	0	0	0	2	0	0	1	1	1	1	0	0	0	0	0	0	0	1	0	0	0	0	0	0	0	1	0	1	0	0	0	2	0	0	1	1	0
1176	1	1	0	0	1	1	1	1	1	0	0	0	1	1	1	2	0	0	1	1	1	1	0	0	0	1	0	1	1	1	0	0	0	0	0	0	1	1	0	1	0	0	0	1	1	1	0	1	0
1177	0	0	2	2	1	1	1	1	0	2	2	0	0	1	1	2	0	0	0	2	0	0	0	0	0	0	0	0	0	0	0	0	0	0	0	0	0	2	0	1	0	0	0	2	0	0	0	0	0
1178	0	0	2	2	1	1	1	1	1	1	2	1	1	2	2	2	0	0	0	2	0	0	0	0	0	2	0	2	2	0	0	0	0	0	0	0	1	1	0	1	0	1	1	1	1	1	0	0	0
1179	0	2	0	0	0	2	2	2	2	1	1	1	1	2	0	1	0	0	1	0	1	0	1	1	0	0	0	0	0	0	0	0	0	0	0	0	0	1	0	2	1	0	0	1	0	1	1	1	0
1180	0	2	0	0	0	2	2	2	2	1	1	2	0	2	0	0	0	0	1	0	1	0	1	1	0	0	0	0	0	0	0	0	0	0	0	0	0	1	0	2	1	0	0	1	0	1	1	1	0
1181	2	0	0	0	2	0	0	0	0	1	2	0	2	1	0	2	0	0	1	1	1	0	0	0	1	1	0	0	0	0	0	1	0	0	0	0	1	1	0	1	0	1	0	1	1	1	1	1	0
1182	0	2	0	0	2	0	0	0	0	1	1	0	2	1	0	2	0	0	1	0	1	0	1	1	1	0	0	0	0	0	1	0	1	0	0	0	1	0	0	2	0	1	0	1	1	1	2	0	0
1183	0	2	0	0	0	0	0	0	0	2	1	1	0	2	1	2	0	0	1	1	1	0	0	0	1	1	1	1	1	1	0	2	1	0	0	0	0	0	0	0	1	2	1	1	0	0	1	1	1
1184	0	2	0	0	2	0	0	0	0	2	2	1	0	2	2	1	0	0	1	1	1	0	0	0	2	0	1	0	0	1	0	1	1	0	0	0	0	1	0	0	1	1	0	0	1	1	0	0	0
1185	1	1	0	0	0	1	1	1	0	1	1	1	0	1	1	2	0	0	1	1	1	1	0	0	0	0	0	0	0	1	0	0	0	0	0	0	1	1	0	1	0	2	1	1	0	0	0	0	0
1186	1	0	1	1	2	1	1	1	1	0	1	1	1	2	2	2	0	0	0	2	0	0	0	0	0	2	0	1	1	0	1	0	1	0	0	0	0	2	0	2	0	2	1	2	0	0	0	0	0
1187	1	0	1	1	2	1	1	1	1	0	0	1	1	2	2	2	0	0	0	2	0	0	0	0	0	2	0	1	1	0	1	0	1	0	0	0	0	2	0	2	0	2	1	2	0	0	0	0	0
1188	2	0	0	0	2	0	0	0	0	0	0	2	0	0	0	0	0	0	1	0	1	1	1	1	0	0	0	0	0	1	0	0	1	1	0	0	0	1	0	1	0	0	0	1	1	1	0	1	1
1189	2	0	0	0	2	0	0	0	0	0	0	2	0	0	0	0	0	0	0	1	0	0	1	1	0	1	0	1	1	0	0	0	1	0	0	0	0	1	0	1	0	1	1	1	1	1	0	0	1
1190	0	2	0	0	2	0	0	0	0	2	1	0	0	2	2	2	0	0	1	1	1	0	2	2	0	0	0	0	0	0	1	1	2	0	0	0	0	0	0	0	0	2	0	0	0	0	0	2	0
1191	0	2	0	0	2	0	0	0	0	2	0	2	0	2	1	2	0	0	1	2	1	0	1	1	1	0	0	0	0	0	1	1	1	0	0	0	1	0	0	1	0	2	0	0	0	0	0	2	2
1192	0	1	0	0	0	2	2	0	0	0	0	1	1	1	0	2	0	0	1	0	1	0	2	2	0	0	1	0	0	1	0	0	1	0	0	0	1	0	0	2	0	1	0	0	0	2	2	0	0
1193	0	1	1	1	0	0	0	1	1	0	0	1	1	1	0	0	0	0	1	0	1	0	2	2	0	0	0	0	0	0	0	1	2	0	0	0	2	0	0	2	0	1	1	1	0	1	1	0	0
1194	1	0	1	1	0	1	1	1	0	2	2	0	0	2	1	0	0	0	0	0	0	0	0	0	0	1	0	0	0	0	1	1	1	0	0	0	1	0	0	1	0	0	0	1	1	1	0	0	1
1195	1	0	1	1	0	1	1	1	1	0	1	1	1	2	1	0	0	0	2	0	2	0	0	0	1	1	0	1	1	0	0	2	0	0	0	0	0	1	0	0	0	0	0	0	2	2	0	0	1
1196	1	0	1	1	0	1	1	1	1	0	1	1	1	2	1	0	0	0	1	0	1	0	0	0	0	2	0	1	1	0	1	2	0	0	0	0	0	1	0	0	0	0	0	0	2	2	0	0	1
1197	1	0	0	0	0	0	0	0	0	2	1	2	0	0	0	0	0	0	1	0	1	0	0	0	1	1	0	0	0	0	1	0	0	0	0	0	1	0	0	2	0	0	0	1	1	1	0	1	0
1198	0	1	2	2	0	0	0	0	0	2	0	2	0	0	0	0	0	0	0	0	0	0	2	2	0	0	0	0	0	0	0	0	1	0	0	0	0	2	0	2	0	1	0	1	1	1	1	0	0
1199	0	1	1	1	0	0	0	0	0	2	2	1	1	0	0	1	1	1	1	1	1	0	0	0	1	1	0	0	0	0	1	0	1	0	0	0	1	0	0	1	1	1	0	1	0	0	2	0	0
1200	0	2	0	0	1	0	0	0	0	2	0	1	0	2	0	2	0	0	1	1	1	0	1	1	1	0	1	0	0	1	1	2	1	0	0	0	1	0	0	0	1	1	0	1	1	1	0	1	0
1201	0	2	0	0	2	0	0	0	0	2	0	2	0	2	0	2	0	0	1	1	1	0	1	1	1	0	1	0	0	1	1	2	2	0	0	0	0	0	0	0	0	1	0	1	1	1	0	1	0
1202	1	1	0	0	1	1	1	1	1	2	2	2	0	0	0	1	0	0	1	1	1	0	0	0	2	0	0	1	1	0	0	0	0	0	0	0	1	0	0	0	1	2	0	1	0	0	2	0	0
1203	0	2	0	0	0	0	0	0	1	2	2	0	2	2	0	1	0	0	0	1	0	0	1	1	1	0	0	1	1	0	0	0	0	0	0	0	1	0	0	2	0	0	0	2	0	0	2	0	0
1204	0	2	0	0	2	0	0	0	0	2	2	0	2	0	0	2	2	2	2	0	2	0	1	1	0	0	0	0	0	0	1	0	2	0	0	0	1	0	0	2	0	2	0	0	0	0	1	0	0
1205	0	2	0	0	2	1	1	2	0	1	1	0	2	0	0	0	0	0	0	2	0	0	1	1	0	1	0	0	0	0	2	0	0	0	0	0	1	0	0	0	2	2	0	2	0	0	0	0	0
1206	0	2	1	1	1	1	1	1	1	1	1	1	0	2	0	0	2	0	1	0	1	0	0	0	0	0	0	0	0	0	1	0	0	1	0	0	0	0	0	0	0	2	0	2	0	0	0	2	0
1207	0	2	0	0	0	1	1	1	0	1	1	2	0	2	0	0	1	1	1	0	1	0	1	1	0	0	0	0	0	0	2	1	0	0	0	0	0	0	0	0	0	1	0	1	1	1	0	1	0
1208	1	1	0	0	0	0	0	0	0	0	1	0	1	1	0	0	0	0	1	0	1	0	1	1	0	0	0	0	0	0	0	1	0	1	0	0	0	1	0	0	0	1	1	1	0	1	1	0	1
1209	0	2	0	0	0	0	0	0	0	0	1	0	0	1	0	1	0	0	2	0	2	0	0	0	0	0	0	0	0	0	0	2	1	0	0	0	0	2	0	1	0	0	0	0	1	2	1	0	0
1210	0	2	0	0	0	1	1	1	0	1	2	2	0	2	1	2	1	1	1	0	1	0	0	0	0	1	0	1	1	0	0	1	0	1	0	0	0	0	0	0	0	1	1	1	1	1	1	0	0
1211	0	2	0	0	0	0	0	0	0	2	1	1	0	2	1	0	0	0	1	1	1	0	0	0	2	0	1	0	0	1	0	0	1	0	0	0	1	1	0	0	1	1	0	0	1	1	0	0	0
1212	0	2	0	0	0	0	0	0	0	2	1	1	0	2	1	1	1	1	1	0	1	0	0	0	1	1	1	1	1	1	0	1	1	1	0	0	0	0	0	0	0	1	1	1	1	1	1	0	0
1213	0	2	0	0	0	1	1	1	0	1	2	2	0	2	1	2	1	1	1	0	1	0	0	0	0	1	0	1	1	0	0	1	0	1	0	0	0	0	0	0	0	1	1	1	1	1	1	0	0
1214	0	1	1	1	1	0	0	0	0	1	1	1	0	0	0	0	0	0	1	0	0	0	1	1	1	0	0	0	0	0	1	1	1	1	1	1	0	2	0	0	1	1	0	0	0	1	0	0	0
1215	1	0	0	0	1	0	0	0	0	1	1	1	0	0	0	1	1	1	2	0	1	0	2	2	0	0	0	0	0	0	1	0	1	2	1	1	0	2	0	0	1	1	0	0	0	1	0	0	0
1216	1	1	0	0	2	0	0	0	0	1	2	0	1	0	0	2	1	1	2	0	2	0	0	0	0	0	0	0	0	0	0	0	2	0	0	0	1	0	0	2	0	2	0	0	0	0	1	1	0
1217	1	0	0	0	2	0	0	0	0	2	2	0	2	0	0	2	0	0	1	1	1	0	0	0	0	2	0	0	0	0	0	0	2	0	0	0	0	0	0	1	0	0	0	2	0	0	2	0	0
1218	1	1	0	0	2	1	1	1	1	0	0	1	0	0	0	2	0	0	1	1	1	1	0	0	0	1	0	1	1	1	0	0	0	0	0	0	1	1	0	1	0	0	0	1	1	1	0	1	0
1219	1	1	0	0	2	1	1	1	1	0	0	1	0	0	0	2	0	0	1	1	1	1	0	0	0	1	0	1	1	1	0	0	0	0	0	0	1	1	0	1	0	0	0	1	1	1	0	1	0
1220	0	0	2	2	1	1	1	1	1	1	2	1	1	2	2	2	0	0	1	1	1	1	0	0	0	0	0	0	0	1	0	0	0	0	0	0	0	1	0	1	0	0	0	2	0	0	1	1	0
1221	0	0	2	2	1	1	1	1	1	1	2	1	1	2	2	2	0	0	0	2	0	0	0	0	0	1	0	1	1	0	0	0	0	0	0	0	0	1	0	1	0	1	1	2	0	0	1	0	0
1222	1	1	0	0	2	0	0	0	0	0	0	0	0	0	0	2	0	0	0	1	0	0	2	2	0	0	0	0	0	0	0	0	1	1	0	0	0	0	0	0	0	2	2	1	0	0	0	0	1
1223	1	1	0	0	0	1	1	1	1	0	1	0	0	1	0	2	0	0	1	0	1	0	0	0	0	0	0	0	0	0	0	1	0	1	0	0	0	2	0	1	0	0	0	0	1	2	1	0	0
1224	1	1	0	0	2	0	0	0	0	1	1	0	1	0	0	0	2	1	1	0	1	0	0	0	1	1	0	0	0	0	1	0	2	0	0	0	1	0	0	1	0	0	0	1	1	1	1	0	0
1225	1	1	0	0	2	1	1	1	1	2	0	0	1	0	0	0	1	1	1	0	1	0	0	0	1	1	0	0	0	0	1	0	2	0	0	0	1	0	0	0	1	1	0	0	1	1	0	1	0
1226	1	1	0	0	2	1	1	1	1	2	0	0	1	0	0	0	1	1	2	0	2	0	1	1	0	1	0	0	0	0	1	0	2	0	0	0	1	0	0	1	0	1	0	1	0	0	1	1	0
1227	0	1	0	0	2	0	0	0	0	0	1	1	1	0	0	0	1	1	2	0	2	0	1	1	0	1	0	0	0	0	1	0	2	0	0	0	1	0	0	1	0	0	0	1	1	1	2	0	0
1228	1	1	0	0	2	1	1	1	1	0	0	1	0	0	0	2	0	0	0	2	0	0	0	0	0	2	0	2	2	0	0	0	0	0	0	0	1	1	0	1	0	1	1	1	1	1	0	0	0
1229	1	0	1	1	0	0	0	0	0	1	1	2	0	1	1	2	0	0	1	1	1	1	0	0	0	0	0	0	0	1	0	0	0	0	0	0	0	1	0	1	0	1	1	2	0	0	1	0	0
1230	1	0	1	1	0	0	0	0	0	1	1	2	0	1	1	2	0	0	1	1	1	1	0	0	0	1	0	1	1	1	0	0	0	0	0	0	1	1	0	1	0	0	0	1	1	1	0	1	0
1231	1	0	1	1	0	0	0	0	0	1	1	1	0	1	1	2	0	0	1	1	1	1	0	0	0	0	0	0	0	1	0	0	0	0	0	0	0	1	0	1	0	0	0	2	0	0	1	1	0
1232	1	0	0	1	1	0	0	0	0	1	0	0	2	1	0	0	1	1	2	0	2	0	0	0	2	0	0	0	0	0	0	0	0	0	0	0	0	0	0	1	0	1	0	1	0	0	1	0	0
1233	0	2	0	0	0	0	0	0	0	2	1	1	0	2	1	1	0	0	1	1	1	0	0	0	1	1	0	1	1	0	0	1	1	0	0	0	0	0	0	0	1	2	1	1	0	0	1	1	1
1234	0	2	0	0	1	1	1	2	0	2	2	1	0	2	2	2	0	0	1	1	1	0	0	0	0	1	0	1	1	0	0	1	1	0	0	0	0	0	0	0	1	2	0	0	0	0	1	1	1
1235	0	2	0	0	0	1	1	1	0	1	1	2	0	2	0	2	0	0	1	1	1	0	1	1	0	0	0	0	0	0	1	1	0	0	0	0	0	0	0	0	0	1	0	1	1	1	0	1	0
1236	2	0	0	0	2	1	1	1	1	1	1	1	0	0	0	2	2	2	1	0	1	0	2	2	0	0	0	0	0	0	0	0	1	1	1	1	0	0	0	1	0	1	0	0	1	1	0	0	0
1237	2	0	1	1	1	1	1	1	0	0	1	0	2	1	0	1	0	0	1	1	1	0	0	0	0	1	0	0	0	0	0	1	0	0	0	0	0	1	0	1	0	0	0	1	1	1	0	0	0
1238	1	2	0	0	0	0	0	0	0	2	2	0	1	0	0	0	1	1	1	1	1	0	0	0	2	0	0	0	0	0	1	0	1	0	0	0	0	0	0	1	1	1	0	0	1	1	0	0	0
1239	1	1	0	0	0	2	2	2	2	2	2	0	0	1	1	0	1	1	1	1	1	0	0	0	2	0	0	0	0	0	2	0	2	0	0	0	0	1	0	1	1	1	0	0	0	0	0	0	0
1240	1	1	0	0	2	1	2	2	0	1	0	1	0	0	0	2	1	1	2	0	1	0	1	1	1	0	0	0	0	1	0	0	2	0	0	0	0	0	0	1	0	2	0	0	0	0	1	0	0
1241	2	0	0	0	1	0	0	0	0	1	0	2	0	1	0	0	2	2	2	0	1	0	2	2	0	0	0	0	0	0	0	0	0	2	0	0	0	0	0	0	0	1	0	0	0	1	1	0	0
1242	0	1	0	0	0	1	1	1	0	2	0	2	0	0	0	0	0	0	2	0	2	0	0	0	0	2	0	0	0	0	0	0	1	0	0	0	0	2	0	1	0	1	0	2	0	0	0	1	0
1243	2	0	0	0	0	1	1	2	1	2	1	0	2	1	0	0	0	0	1	0	1	0	0	0	0	2	0	0	0	0	0	0	0	0	0	0	1	0	0	2	0	0	0	1	1	1	0	1	0
1244	0	2	0	0	0	1	1	1	0	2	2	1	1	0	0	2	0	0	0	2	0	0	0	0	0	0	0	1	1	0	0	0	1	1	1	1	1	0	0	0	0	1	0	0	1	1	0	0	0
1246	0	2	0	0	1	1	1	1	0	1	2	1	1	0	0	1	1	1	1	1	1	0	1	1	0	1	0	0	0	0	2	0	1	0	0	0	1	0	0	1	0	1	0	0	1	1	1	1	0
1247	0	2	0	0	1	2	2	2	1	2	1	1	1	0	0	2	1	1	1	1	1	0	1	1	0	1	0	0	0	0	2	0	1	0	0	0	1	0	0	1	0	1	0	0	1	1	1	1	0
1248	0	2	0	0	1	1	1	1	1	2	1	1	1	0	0	2	1	1	2	0	2	0	0	0	0	1	0	0	0	0	1	0	2	1	1	1	1	0	0	0	0	1	0	0	1	1	1	0	1
1249	0	2	0	0	1	0	0	0	0	1	2	1	1	0	0	2	1	1	2	0	2	0	0	0	0	1	0	0	0	0	1	0	2	1	1	1	1	0	0	0	0	1	0	0	1	1	1	0	1
1250	0	2	0	0	0	1	1	0	0	1	0	2	0	2	0	2	2	2	0	2	0	0	1	1	1	0	0	0	0	0	0	0	0	0	0	0	0	0	0	2	1	0	0	1	0	0	1	1	0
1251	0	2	0	0	0	2	2	2	2	1	1	1	1	2	0	2	1	1	0	1	0	0	2	2	0	0	0	0	0	0	0	0	0	0	0	0	0	0	0	1	1	2	0	0	0	0	1	1	0
1252	0	2	0	0	2	2	2	2	1	1	1	1	1	2	0	0	0	0	0	2	0	0	0	0	0	2	0	0	0	0	1	1	1	0	0	0	1	0	0	1	0	1	0	1	0	1	1	0	0
1253	0	2	0	0	2	2	2	2	0	1	1	1	1	2	0	1	1	1	1	1	1	0	1	1	1	0	0	0	0	0	0	2	1	0	0	0	1	0	0	1	0	2	0	1	0	0	1	0	0
1254	0	2	0	0	0	0	0	0	0	2	2	1	1	0	0	2	1	1	1	1	1	0	0	0	1	1	0	0	0	0	1	0	2	0	0	0	0	0	0	1	1	0	0	1	0	1	1	0	0
1255	0	1	2	2	0	0	0	0	0	2	2	1	1	0	0	1	1	1	1	1	1	0	0	0	1	1	0	0	0	0	1	0	1	0	0	0	1	0	0	1	1	1	0	1	0	0	2	0	0
1256	0	1	1	1	0	1	1	1	0	2	2	1	0	2	2	2	0	0	0	2	0	0	0	0	0	0	0	0	0	0	0	0	0	0	0	0	0	0	0	0	0	1	0	1	0	0	1	0	0
1257	0	2	0	0	1	0	1	0	0	1	1	2	0	2	0	1	1	1	1	0	1	0	1	1	0	0	0	0	0	0	1	1	1	0	0	0	1	0	0	0	1	1	0	1	1	1	0	1	0
1258	0	2	0	0	1	1	2	2	0	2	2	2	0	2	0	0	1	1	1	0	1	0	1	1	0	0	0	0	0	0	1	1	0	0	0	0	1	0	0	0	0	1	0	1	1	1	0	1	0
1259	0	1	1	1	1	2	2	2	1	1	1	0	1	1	1	0	0	0	0	0	0	0	0	0	1	0	0	0	0	0	0	1	0	0	0	0	1	1	0	1	0	0	0	1	0	1	1	0	0
1260	0	1	1	1	0	2	2	2	2	1	1	1	1	2	1	0	0	0	1	1	1	0	0	0	0	2	0	1	1	0	0	1	1	0	0	0	0	2	0	0	0	0	0	0	2	2	1	0	0
1261	0	1	1	1	1	2	2	2	2	1	1	1	1	2	1	0	0	0	1	0	1	0	0	0	1	1	0	1	1	0	0	2	1	0	0	0	0	2	0	0	0	0	0	0	1	2	1	0	0
1262	1	1	0	0	1	1	1	1	1	0	1	0	0	1	0	0	0	0	1	1	1	0	0	0	2	0	0	0	0	0	1	0	1	0	0	0	1	1	0	0	1	1	0	0	1	1	0	1	0
1263	1	1	0	0	0	0	0	0	0	0	2	0	0	0	0	1	0	0	1	1	1	0	0	0	2	0	0	0	0	1	1	0	0	0	0	0	1	0	0	0	0	1	0	0	1	1	1	1	1
1264	1	1	0	0	0	0	0	0	0	0	2	0	0	1	0	1	0	0	1	1	1	0	0	0	2	0	0	0	0	1	1	0	1	0	0	0	1	1	0	0	1	0	0	0	2	2	1	0	1
1265	2	0	0	0	2	0	0	0	0	1	2	0	2	1	0	0	0	0	2	0	2	0	0	0	2	0	0	0	0	0	1	0	0	0	0	0	0	0	0	2	0	1	0	1	1	1	2	0	0
1266	1	1	0	0	2	0	0	0	0	2	2	0	2	0	0	2	0	0	1	1	1	0	0	0	0	2	0	0	0	0	0	1	1	0	0	0	0	1	0	1	0	1	0	1	1	1	1	1	0
1267	0	1	1	1	0	2	2	2	1	2	2	0	1	2	1	0	0	0	0	1	0	0	0	0	0	1	0	0	0	0	0	0	1	0	0	0	1	1	0	1	0	0	0	1	1	1	1	0	0
1268	0	1	1	1	2	2	2	2	2	0	0	2	0	1	1	0	0	0	0	0	0	0	0	0	1	0	0	0	0	0	0	1	0	0	0	0	1	1	0	1	0	0	0	1	0	1	1	0	0
1269	0	1	1	1	2	2	2	2	2	0	0	2	0	1	1	0	0	0	1	0	1	0	0	0	1	1	0	1	1	0	0	2	0	0	0	0	0	2	0	0	0	0	0	0	1	2	1	0	0
1270	0	1	1	1	1	2	2	2	1	1	1	2	0	1	1	0	0	0	0	1	0	0	0	0	1	0	0	0	0	0	0	1	0	0	0	0	1	1	0	1	0	0	0	1	1	1	1	0	0
1271	1	0	1	1	2	2	2	2	2	2	2	0	2	0	0	0	0	0	1	1	1	0	1	1	0	2	0	0	0	1	1	0	1	0	0	0	1	0	0	1	0	2	0	0	0	0	2	0	0
1272	1	0	1	1	2	0	0	0	0	1	2	0	2	0	0	0	0	0	1	1	1	0	0	0	0	2	0	0	0	2	2	0	0	0	0	0	0	0	0	1	0	0	0	2	0	0	2	0	0
1273	2	0	0	0	0	0	0	0	1	1	0	2	0	0	0	1	0	0	1	0	1	1	1	1	0	0	0	0	0	0	0	0	0	0	0	0	0	0	0	2	0	0	0	2	0	0	0	2	0
1274	2	0	0	0	0	0	0	0	0	1	0	2	0	0	0	2	0	0	1	0	1	1	1	1	0	0	0	0	0	1	0	0	0	0	0	0	0	1	0	2	0	1	0	1	0	0	1	1	0
1275	1	1	0	0	1	0	0	0	0	0	1	0	2	1	0	1	0	0	1	1	1	0	1	1	0	0	0	0	0	0	0	1	1	0	0	0	1	0	0	0	0	2	1	1	0	0	0	0	1
1276	1	1	0	0	1	0	0	0	0	0	1	0	2	1	0	2	0	0	1	1	1	0	1	1	0	0	0	0	0	0	0	2	1	1	0	0	1	1	0	1	0	1	0	0	1	1	1	0	0
1277	0	1	1	1	1	2	2	2	1	1	2	0	1	2	2	2	0	0	0	2	0	0	0	0	0	1	0	1	1	0	0	0	0	0	0	0	1	1	0	1	0	2	1	1	0	0	0	0	0
1278	1	1	0	0	0	1	1	1	0	1	1	1	0	1	1	2	0	0	1	1	1	1	0	0	0	0	0	0	0	1	0	0	0	0	0	0	1	1	0	1	0	1	0	1	0	0	0	1	0
1279	1	0	1	1	2	1	1	1	1	0	1	1	1	2	2	2	0	0	0	2	0	0	0	0	0	2	0	1	1	0	1	0	1	0	0	0	0	2	0	2	0	2	1	2	0	0	0	0	0
1280	0	1	1	1	1	2	2	2	1	1	2	1	1	2	2	2	0	0	0	2	0	0	0	0	0	1	0	1	1	0	0	0	1	0	0	0	1	1	0	1	0	2	1	1	0	0	0	0	0
1281	2	0	0	0	1	0	0	0	0	0	1	0	2	1	0	2	0	0	1	1	1	0	0	0	0	1	0	0	0	0	0	1	1	1	0	0	0	1	0	1	0	0	0	1	1	1	1	0	0
1282	0	1	1	1	0	0	0	0	0	1	2	0	1	1	0	2	2	2	1	0	0	1	0	0	0	0	0	0	0	1	0	1	1	0	0	0	1	0	0	1	1	1	1	1	1	1	0	0	0
1283	1	1	0	0	0	1	1	1	0	1	1	0	1	0	0	1	0	0	1	0	0	1	0	0	1	0	0	0	0	1	0	0	1	0	0	0	0	0	0	1	1	2	1	1	0	0	0	0	1
1284	0	1	1	1	0	1	1	1	0	1	1	1	1	1	0	1	1	1	0	0	0	0	0	0	1	0	1	0	0	1	0	1	1	0	0	0	0	0	0	1	1	2	1	1	0	0	0	0	1
1285	1	1	0	0	0	1	1	1	0	1	1	0	1	0	0	1	1	1	1	0	0	1	0	0	1	0	0	0	0	1	0	0	1	0	0	0	0	0	0	1	1	2	1	1	0	0	0	0	1
1286	0	1	1	1	0	2	2	2	2	1	1	1	1	2	1	0	0	0	1	1	1	0	0	0	0	2	0	1	1	0	0	1	1	0	0	0	0	2	0	0	0	0	0	0	2	2	1	0	0
1287	0	1	1	1	0	2	2	2	2	1	1	0	1	2	1	0	0	0	1	1	1	0	0	0	0	2	0	1	1	0	0	1	1	0	0	0	0	2	0	0	0	0	0	0	2	2	1	0	0
1288	0	1	1	1	2	2	2	2	2	0	0	2	0	1	1	1	0	0	1	0	1	0	0	0	1	1	0	1	1	0	0	2	0	0	0	0	0	2	0	0	0	0	0	0	1	2	1	0	0
1289	0	1	0	0	2	2	2	2	2	0	0	2	0	1	1	0	0	0	1	0	1	0	0	0	1	1	0	1	1	0	0	2	0	0	0	0	0	2	0	0	0	0	0	0	1	2	1	0	0
1290	1	1	0	0	2	0	0	0	0	0	0	1	1	1	1	0	0	0	1	0	1	0	1	1	0	0	0	0	0	0	0	0	1	1	0	0	0	1	0	0	0	0	0	0	2	2	1	0	1
1291	1	1	0	0	2	0	0	0	0	1	0	2	0	1	0	0	0	0	1	0	1	0	1	1	1	0	0	0	0	0	0	0	1	1	0	0	1	0	0	0	1	0	0	0	2	2	0	0	1
1292	0	2	0	0	2	1	1	1	1	2	2	0	2	0	0	1	1	1	1	1	1	0	1	1	1	0	0	0	0	0	2	1	2	0	0	0	1	0	0	1	1	2	0	1	0	0	0	0	0
1293	0	2	0	0	2	2	2	2	1	2	2	0	2	1	0	0	1	1	2	0	2	0	1	1	1	0	0	0	0	0	1	1	1	0	0	0	1	0	0	2	0	2	0	0	0	0	1	0	0
1294	0	2	0	0	2	0	0	0	0	1	1	0	2	0	0	0	0	0	0	2	0	0	1	1	0	1	0	1	1	0	1	1	1	0	0	0	1	0	0	0	1	1	0	1	1	1	0	0	0
1295	0	2	0	0	1	0	0	0	0	2	2	1	0	2	2	0	0	0	1	1	1	0	0	0	0	2	0	0	0	0	0	1	2	0	0	0	0	0	0	0	2	2	1	1	0	0	1	1	1
1296	0	2	0	0	2	0	0	0	0	2	2	1	0	2	2	2	0	0	0	2	0	0	0	0	2	0	0	0	0	0	0	1	0	0	0	0	0	1	0	0	0	2	1	1	0	0	1	1	1
1297	1	1	0	0	2	0	0	0	0	1	0	0	2	2	0	1	1	1	1	0	1	0	1	1	1	0	0	0	0	0	0	2	0	1	0	0	1	0	0	1	0	2	1	1	0	0	1	0	1
1298	1	1	0	0	2	0	0	0	0	1	0	0	2	1	0	0	2	2	1	0	1	0	1	1	1	0	0	0	0	0	0	1	0	1	0	0	1	0	0	0	0	2	1	1	0	0	1	0	1
1299	2	0	0	0	1	0	0	0	0	0	0	1	0	1	1	2	0	0	1	1	1	1	0	0	0	1	0	0	0	1	1	0	1	0	0	0	0	2	0	2	0	1	0	2	0	0	0	1	0
1300	1	0	1	1	2	1	1	1	1	0	1	1	1	2	2	2	0	0	0	2	0	0	0	0	0	2	0	1	1	0	1	0	1	0	0	0	0	2	0	2	0	2	1	2	0	0	0	0	0
1301	1	0	1	1	2	1	1	1	1	0	1	1	1	2	2	2	0	0	0	2	0	0	0	0	0	2	0	1	1	0	1	0	1	0	0	0	0	2	0	2	0	2	1	2	0	0	0	0	0
1302	0	1	1	1	1	2	2	2	1	1	2	0	1	2	2	2	0	0	0	2	0	0	0	0	0	1	0	1	1	0	0	0	0	0	0	0	1	1	0	1	0	2	1	1	0	0	0	0	0
1303	0	2	0	0	2	0	0	0	0	2	2	1	0	2	2	1	0	0	1	1	1	0	0	0	2	0	0	0	0	0	0	0	0	0	0	0	0	0	0	0	1	2	0	0	0	0	0	1	0
1304	0	2	0	0	2	0	0	0	0	2	2	2	0	2	2	2	0	0	1	1	1	0	0	0	2	0	0	0	0	0	0	0	1	0	0	0	0	0	0	0	0	2	1	1	0	0	1	1	1
1305	0	2	1	1	2	2	2	2	0	2	2	1	1	2	0	0	2	2	2	0	2	0	0	0	2	0	0	0	0	0	0	2	2	0	0	0	1	0	0	2	0	2	0	0	0	0	0	0	0
1306	0	2	0	0	2	2	2	2	2	1	1	1	1	1	0	0	2	2	2	0	2	0	1	1	1	0	0	0	0	0	0	1	0	0	0	0	1	0	0	2	0	2	0	0	0	0	0	0	0
1307	1	0	1	1	0	0	0	0	0	1	1	2	0	1	1	2	0	0	1	1	1	1	0	0	0	0	0	0	0	1	0	0	0	0	0	0	0	1	0	1	0	0	0	2	0	0	1	1	0
1308	0	1	1	1	2	2	2	2	2	0	1	0	1	1	1	2	0	0	1	1	1	1	0	0	0	1	0	1	1	1	0	0	0	0	0	0	1	1	0	1	0	1	1	1	1	1	0	0	0
1309	0	1	1	1	2	2	2	2	2	0	1	0	1	1	1	2	0	0	0	2	0	0	0	0	0	2	0	2	2	0	0	0	0	0	0	0	0	1	0	1	0	1	1	1	1	1	0	0	0
1310	1	1	0	0	2	2	2	2	2	0	1	0	1	1	1	2	0	0	1	1	1	1	0	0	0	1	0	1	1	1	0	0	0	0	0	0	0	1	0	0	0	1	1	1	1	1	0	0	0
1311	0	2	0	0	2	2	2	2	0	1	1	0	2	1	0	0	1	1	1	2	1	0	1	1	1	0	0	0	0	0	1	2	2	0	0	0	1	0	0	1	1	2	0	1	0	0	2	0	0
1312	0	2	0	0	1	2	2	2	0	1	1	0	2	0	0	0	0	0	0	2	0	0	2	2	0	0	0	0	0	0	0	1	0	0	0	0	0	0	0	0	0	0	0	0	0	2	0	0	0
1313	0	2	0	0	0	0	2	2	0	2	1	0	0	2	0	2	0	0	1	2	1	0	0	0	2	0	1	0	0	1	1	2	1	0	0	0	0	0	0	0	0	1	0	1	1	1	0	1	0
1314	0	2	0	0	2	0	0	0	0	2	0	1	0	2	0	2	0	0	1	1	1	0	1	1	1	0	1	0	0	1	1	2	2	0	0	0	1	0	0	0	1	1	0	1	1	1	0	1	0
1315	0	2	0	0	2	1	1	1	1	0	0	0	2	2	0	2	0	0	1	1	1	0	0	0	0	2	0	0	0	0	1	0	2	0	0	0	1	1	0	1	0	0	0	0	2	2	2	0	0
1316	0	1	0	0	2	0	0	0	0	1	0	2	1	2	0	1	1	0	0	2	0	0	0	0	0	0	0	0	0	0	2	0	2	0	0	0	1	0	0	2	0	0	0	0	2	2	2	0	0
1317	1	0	1	1	2	1	1	1	1	0	1	1	1	2	2	2	0	0	0	2	0	0	0	0	0	2	0	1	1	0	1	0	1	0	0	0	0	2	0	2	0	2	1	2	0	0	0	0	0
1318	0	1	1	1	1	2	2	2	1	1	2	0	1	2	2	2	0	0	0	2	0	0	0	0	0	1	0	1	1	0	0	0	0	0	0	0	1	1	0	1	0	1	0	1	0	0	0	1	0
1319	1	1	0	0	0	1	1	1	0	1	1	1	0	1	1	2	0	0	1	1	1	1	0	0	0	0	0	0	0	1	0	0	0	0	0	0	1	1	0	1	0	1	0	1	0	0	0	1	0
1320	0	1	1	1	1	2	2	2	1	1	2	0	1	2	2	2	0	0	0	2	0	0	0	0	0	1	0	1	1	0	0	0	0	0	0	0	1	1	0	1	0	1	0	1	0	0	0	1	0
1321	1	1	0	0	0	0	0	0	0	2	1	2	0	0	0	1	1	1	2	0	2	0	0	0	2	0	0	0	0	0	0	0	0	0	0	0	0	0	0	1	0	0	0	1	0	1	1	0	0
1322	0	2	0	0	0	1	1	1	0	2	1	1	1	0	0	1	1	1	2	0	2	2	0	0	0	0	0	0	0	0	2	0	0	0	0	0	1	0	0	1	0	0	0	1	0	1	1	0	0
1323	0	1	1	1	0	2	2	2	2	1	1	2	0	2	1	0	0	0	1	1	1	0	0	0	0	2	0	1	1	0	0	1	0	0	0	0	0	2	0	0	0	0	0	0	1	2	1	0	0
1324	0	1	1	1	0	2	2	2	2	1	1	2	0	2	1	0	0	0	0	1	0	0	0	0	0	1	0	0	0	0	0	0	0	0	0	0	1	1	0	1	0	0	0	1	1	1	1	0	0
1325	0	1	1	1	0	2	2	2	1	2	2	0	1	2	1	1	0	0	0	1	0	0	0	0	0	1	0	0	0	0	0	0	1	0	0	0	1	1	0	1	0	0	0	1	1	1	1	0	0
1326	0	1	1	1	1	2	2	2	1	1	1	0	1	1	1	0	0	0	1	0	1	0	0	0	1	1	0	1	1	0	0	2	0	0	0	0	0	2	0	0	0	0	0	0	1	2	1	0	0
1327	0	1	1	1	0	2	2	2	1	2	2	0	1	2	1	0	0	0	0	1	0	0	0	0	0	1	0	0	0	0	0	0	1	0	0	0	1	1	0	1	0	0	0	1	1	1	1	0	0
1328	0	1	0	0	0	2	2	2	1	2	2	1	0	1	1	0	0	0	0	1	0	0	0	0	0	1	0	0	0	0	0	0	0	0	0	0	1	1	0	1	0	0	0	1	1	1	1	0	0
1329	0	1	0	0	2	2	2	2	2	1	1	1	1	2	1	1	0	0	1	1	1	0	0	0	0	2	0	1	1	0	0	1	1	0	0	0	1	1	0	1	0	0	0	1	1	1	1	0	0
1330	0	1	1	1	1	2	2	2	1	1	1	1	0	1	1	0	0	0	0	0	0	0	0	0	1	0	0	0	0	0	0	1	0	0	0	0	1	1	0	1	0	0	0	1	0	1	1	0	0
1331	0	2	0	0	2	0	0	0	0	2	0	1	0	2	0	2	0	0	1	1	1	0	1	1	1	0	0	0	0	0	1	0	2	0	0	0	1	0	0	0	2	2	0	1	0	0	0	2	1
1332	0	2	0	0	0	0	0	0	0	2	0	2	0	2	0	2	0	0	1	1	1	0	0	0	0	0	2	0	0	2	0	2	2	0	0	0	1	0	0	0	0	1	0	1	1	1	0	1	0
1333	0	1	1	1	0	2	2	2	1	2	2	0	1	2	1	0	0	0	1	1	1	0	0	0	0	2	0	1	1	0	0	1	1	0	0	0	0	2	0	0	0	0	0	0	2	2	1	0	0
1334	0	1	1	1	2	2	2	2	2	0	0	2	0	1	1	0	0	0	1	1	1	0	0	0	0	2	0	1	1	0	0	1	0	0	0	0	0	2	0	0	0	0	0	0	2	2	1	0	0
1335	0	1	1	1	2	2	2	2	2	0	0	2	0	1	1	0	0	0	1	0	1	0	0	0	1	1	0	1	1	0	0	2	0	0	0	0	0	2	0	0	0	0	0	0	2	2	1	0	0
1336	0	1	1	1	2	2	2	2	2	0	0	2	0	1	1	0	0	0	0	0	0	0	0	0	1	1	0	1	1	0	0	2	0	0	0	0	1	1	0	1	0	0	0	1	0	1	1	0	0
1337	0	0	1	2	1	0	0	0	0	2	1	1	1	0	0	0	1	1	1	1	1	0	0	0	2	0	0	0	0	0	0	0	1	0	0	0	1	0	0	1	1	1	0	1	0	0	2	0	0
1338	0	1	0	0	0	0	0	0	0	2	2	1	1	0	0	0	1	1	1	1	1	0	0	0	1	1	0	0	0	0	1	0	1	0	0	0	0	0	0	1	1	0	0	2	0	0	2	0	0
1339	0	2	0	0	2	0	0	0	0	2	0	1	0	2	0	2	0	0	1	1	1	0	1	1	1	0	1	0	0	1	1	2	2	0	0	0	1	0	0	0	0	1	0	1	1	1	0	2	0
1340	0	2	0	0	2	0	0	0	0	2	1	1	0	2	1	2	0	0	1	1	1	0	1	1	1	0	0	0	0	0	1	1	2	0	0	0	0	0	0	0	0	2	0	1	0	0	0	2	0
1341	0	1	0	0	2	2	2	2	2	0	0	1	0	1	1	0	0	0	1	0	1	0	0	0	1	1	0	1	1	0	0	2	0	0	0	0	0	2	0	0	0	0	0	0	1	2	1	0	0
1342	0	1	1	1	0	2	2	2	2	1	1	1	1	2	1	1	0	0	1	1	1	0	0	0	0	2	0	1	1	0	0	1	1	0	0	0	0	2	0	0	0	0	0	0	2	2	1	0	0
1343	0	1	1	1	1	2	2	2	1	1	1	2	0	1	1	0	0	0	0	0	0	0	0	0	1	0	0	0	0	0	0	1	0	0	0	0	1	1	0	1	0	0	0	1	0	1	1	0	0
1344	0	1	1	1	0	2	2	2	1	2	2	0	1	2	1	0	0	0	0	1	0	0	0	0	0	1	0	0	0	0	0	0	1	0	0	0	1	1	0	1	0	0	0	1	1	1	1	0	0
1345	2	0	0	0	2	0	0	0	0	0	2	0	2	1	0	0	0	0	2	0	2	0	0	0	2	0	0	0	0	0	1	0	0	0	0	0	1	0	0	2	0	2	0	2	0	0	2	0	0
1346	0	2	0	0	2	0	0	0	0	1	1	0	2	1	0	2	0	0	0	1	0	0	1	1	0	1	0	0	0	0	0	2	1	0	0	0	0	1	0	1	0	0	0	1	1	1	0	2	0
1347	1	0	1	1	0	1	1	1	0	1	2	0	1	2	1	0	0	0	1	0	1	0	0	0	1	0	0	0	0	0	0	1	0	0	0	0	1	1	0	1	1	0	0	2	0	0	1	0	1
1348	1	0	1	1	0	1	1	1	0	1	2	1	1	2	1	0	0	0	1	0	1	0	0	0	1	0	0	0	0	0	0	1	0	0	0	0	1	0	0	1	1	0	0	2	0	0	1	0	1
1349	1	0	1	1	0	1	1	1	1	0	1	1	0	2	1	0	0	0	1	0	1	0	0	0	0	2	0	1	1	0	1	2	1	0	0	0	0	1	0	0	0	0	0	0	2	2	0	0	1
1350	1	0	1	1	0	1	1	1	0	1	2	0	1	2	1	0	0	0	1	0	1	0	0	0	1	0	0	0	0	0	0	1	0	0	0	0	1	0	0	1	1	0	0	2	0	0	1	0	1
1351	1	1	0	0	0	0	0	0	0	0	2	0	0	0	0	0	0	0	1	1	1	0	0	0	2	0	0	0	0	1	1	0	2	0	0	0	1	1	0	0	2	0	0	0	2	2	0	0	0
1352	1	1	0	0	2	0	0	0	0	0	2	0	1	0	0	0	0	0	1	1	1	0	0	0	0	1	0	0	0	0	0	0	0	0	0	0	1	0	0	1	0	1	0	1	0	0	1	1	0
1353	1	1	0	0	2	0	0	0	0	0	2	0	2	0	0	2	0	0	1	1	1	0	0	0	0	0	0	0	0	0	0	0	0	0	0	0	0	0	0	0	0	2	0	0	0	0	1	1	0
1354	0	2	0	0	1	2	2	2	1	2	1	1	1	0	0	1	1	1	2	0	2	0	0	0	0	1	0	0	0	0	1	0	1	1	1	1	1	0	0	0	0	2	0	0	0	0	0	1	1
1355	0	2	0	0	1	0	0	0	0	1	2	1	1	0	0	1	1	1	1	1	1	0	1	1	0	1	0	0	0	0	2	0	2	0	0	0	1	0	0	1	0	0	0	0	2	2	2	0	0
1356	0	2	0	0	1	1	1	1	1	2	1	1	1	0	0	2	1	0	1	0	2	0	0	0	0	1	0	0	0	0	1	0	2	1	1	1	1	0	0	0	0	1	0	0	1	1	1	0	0
1357	0	2	0	0	1	0	0	0	0	1	2	1	1	0	0	2	2	1	2	0	2	0	0	0	0	1	0	0	0	0	1	0	2	1	1	1	1	0	0	0	0	1	0	0	1	1	1	0	1
1358	1	0	0	0	2	0	0	0	0	0	0	1	1	1	1	1	0	0	0	1	0	0	2	2	0	0	0	2	2	0	0	0	1	0	0	0	0	1	0	1	0	1	1	1	1	1	0	0	0
1359	2	0	0	0	0	0	0	0	0	2	0	2	0	0	0	2	0	0	1	0	1	0	2	2	0	0	0	0	0	1	0	0	1	0	0	0	0	0	0	2	0	1	0	1	0	0	1	1	0
1360	0	2	0	0	2	1	1	1	1	1	1	1	1	1	0	0	0	0	1	1	1	0	1	1	0	1	0	0	0	0	0	1	2	0	0	0	1	0	0	2	0	1	0	0	0	1	0	0	0
1361	0	2	0	0	2	2	2	2	1	1	1	1	1	2	0	0	2	2	2	0	2	0	0	0	2	0	0	0	0	0	0	2	1	0	0	0	1	0	0	2	0	2	0	0	0	0	0	0	0
1362	0	2	0	0	0	0	0	0	0	2	0	0	0	2	0	2	0	0	1	1	1	0	1	1	1	0	0	0	0	0	2	0	1	0	0	0	1	0	0	0	1	1	0	1	1	1	0	1	0
1363	0	2	0	0	0	0	2	2	0	2	1	1	0	2	0	0	0	0	1	1	0	0	1	1	1	0	1	0	0	1	1	1	2	0	0	0	1	0	0	0	1	1	0	1	1	1	0	1	0
1364	0	2	0	0	0	1	1	1	0	1	0	2	0	2	0	0	0	0	2	0	1	0	2	2	1	0	0	0	0	0	0	0	0	0	0	0	0	0	0	0	2	2	0	1	0	0	2	0	0
1365	0	2	0	0	0	0	0	0	0	1	1	1	1	2	0	2	2	2	0	1	0	0	1	1	1	0	0	1	1	0	0	0	0	0	0	0	1	0	0	1	2	0	0	2	0	0	1	1	0
1366	1	0	0	0	1	0	0	0	0	1	1	1	1	2	0	1	0	0	2	0	2	0	0	0	1	1	0	0	0	0	1	0	0	0	0	0	0	2	0	0	2	0	0	0	2	2	0	0	0
1367	2	0	0	0	0	1	1	1	1	1	1	1	1	1	0	0	0	0	0	0	0	0	0	0	2	0	0	0	0	0	0	2	1	0	0	0	0	1	0	1	1	0	0	0	2	2	1	0	1
1368	0	1	0	0	2	0	0	0	0	1	0	1	1	0	0	2	0	0	1	0	1	0	0	0	2	0	1	0	0	2	1	0	1	0	0	0	1	0	0	1	0	1	1	1	1	1	1	0	0
1369	0	2	1	1	0	0	0	0	0	1	1	1	1	1	0	2	2	2	2	0	1	0	2	2	0	0	0	0	0	0	0	0	1	0	0	0	2	0	0	1	0	1	0	0	0	1	1	0	0
1370	1	0	1	1	0	1	1	1	0	1	2	1	0	2	1	0	0	0	0	0	0	0	0	0	0	1	0	0	0	0	1	1	1	0	0	0	1	0	0	1	0	0	0	1	1	1	0	0	1
1371	1	0	1	1	0	1	1	1	0	1	2	0	0	2	1	0	0	0	0	0	0	0	0	0	0	1	0	0	0	0	1	1	1	0	0	0	1	0	0	1	0	0	0	1	1	1	0	0	1
1372	1	0	1	1	0	1	1	1	0	1	2	0	0	2	1	0	0	0	0	0	0	0	0	0	0	1	0	0	0	0	1	1	1	0	0	0	0	1	0	1	0	0	0	1	1	1	0	0	1
1373	1	0	1	1	0	1	1	1	0	1	2	0	0	2	1	0	0	0	0	0	0	0	0	0	0	1	0	0	0	0	1	1	1	0	0	0	1	0	0	1	0	0	0	1	1	1	0	0	1
1375	0	2	0	0	0	2	2	2	2	2	2	2	0	0	0	2	0	0	2	0	2	0	0	0	2	0	0	0	0	0	1	0	2	1	1	1	0	0	0	2	0	2	0	0	0	0	0	0	1
1376	0	2	0	0	2	0	0	0	0	2	2	0	1	1	1	2	0	0	2	0	2	0	0	0	2	0	0	0	0	0	1	0	2	0	0	0	1	0	0	0	2	2	0	0	0	0	0	2	0
1377	0	2	0	0	1	0	0	0	0	0	0	0	0	0	0	2	0	0	0	2	0	0	0	0	1	1	0	1	1	0	0	0	1	0	0	0	0	0	0	0	1	0	0	0	2	2	0	2	1
1378	0	1	1	1	2	0	0	0	0	0	1	1	1	0	0	0	1	1	2	0	2	0	1	1	0	1	0	0	0	0	1	0	2	0	0	0	1	0	0	1	0	0	0	1	1	1	2	0	0
1379	0	1	1	1	2	0	0	0	0	0	1	1	1	0	0	0	1	1	1	0	1	0	0	0	1	1	0	0	0	0	1	0	2	1	1	1	1	0	0	0	1	0	0	0	2	2	1	0	0
1380	1	1	0	0	2	1	1	1	1	2	0	1	1	0	0	0	1	1	1	0	1	0	0	0	1	1	0	0	0	0	1	0	2	1	1	1	1	0	0	0	1	1	0	0	1	1	0	1	0
1381	0	1	1	1	2	0	0	0	0	0	1	1	1	0	0	0	1	1	1	0	1	0	0	0	1	1	0	0	0	0	1	0	2	1	1	1	1	0	0	0	1	0	0	0	2	2	1	0	0
1382	0	2	0	0	1	0	1	1	0	2	1	2	0	2	0	1	0	0	1	1	1	0	1	1	1	0	1	0	0	1	1	0	1	0	0	0	1	0	0	0	1	2	0	2	0	0	0	1	0
1383	1	0	0	0	1	0	0	0	0	1	1	1	0	0	0	2	1	1	2	0	1	0	2	2	0	0	0	0	0	0	1	0	1	1	0	0	0	0	0	1	0	1	0	1	0	0	1	0	0
1384	1	0	1	1	1	0	0	0	0	1	1	1	0	0	0	2	1	1	2	0	1	0	2	2	0	0	0	0	0	0	1	0	1	1	0	0	0	0	0	1	0	1	0	1	0	0	1	0	0
1385	0	2	0	0	1	2	2	2	1	2	1	1	1	0	0	2	1	1	1	1	1	0	1	1	0	1	0	0	0	0	2	0	1	0	0	0	1	0	0	1	0	1	0	0	1	1	1	1	0
1386	0	2	0	0	1	0	0	0	0	1	2	1	1	0	0	1	1	1	2	0	2	0	0	0	0	1	0	0	0	0	1	0	2	1	1	1	1	0	0	0	0	1	0	0	1	1	1	0	1
1387	0	2	0	0	1	1	1	1	0	1	2	1	1	0	0	2	1	1	1	1	1	0	1	1	0	1	0	0	0	0	2	0	1	0	0	0	1	0	0	1	0	0	0	0	2	2	2	0	0
1388	1	1	0	0	2	0	0	0	0	1	1	0	1	0	0	1	1	1	1	0	1	0	0	0	1	1	0	0	0	0	1	0	2	0	0	0	1	0	0	0	1	0	0	0	2	2	1	0	0
1389	1	1	0	0	2	1	1	1	1	1	0	1	1	0	0	0	1	1	1	0	1	0	0	0	1	1	0	0	0	0	1	0	2	1	1	1	1	0	0	0	1	1	0	0	1	1	0	1	0
1390	0	1	1	1	2	0	0	0	0	0	1	0	1	0	0	1	1	1	1	0	2	0	1	1	0	1	0	0	0	0	1	0	2	0	0	0	1	0	0	1	0	1	0	1	1	1	2	0	0
1391	1	1	0	0	2	0	0	1	0	2	1	1	1	0	0	0	2	1	0	0	0	0	0	0	1	1	0	0	0	0	1	0	2	1	1	1	1	0	0	0	1	1	0	0	1	1	0	1	0
1392	1	0	2	2	0	0	0	0	0	2	1	2	0	0	0	0	0	0	1	0	1	0	0	0	1	1	0	0	0	0	1	0	0	0	0	0	1	0	0	1	0	0	0	1	1	1	0	1	0
1393	1	1	0	0	0	0	0	0	0	2	1	1	1	1	0	0	0	0	0	0	0	0	1	1	1	0	0	0	0	0	0	0	1	0	0	0	1	1	0	2	0	1	0	1	1	1	1	0	0
1394	1	1	0	0	2	0	0	0	0	2	1	0	1	1	0	1	0	0	0	0	0	0	1	1	1	0	0	0	0	0	0	1	1	1	0	0	0	2	0	1	0	0	0	0	1	2	1	0	0
1395	1	1	0	0	2	0	0	0	0	2	1	0	1	1	0	0	0	0	1	0	1	0	0	0	1	1	0	0	0	0	1	2	1	1	1	1	1	1	0	1	1	0	0	1	0	1	0	1	0
18088	2	0	0	0	2	0	0	0	0	2	2	0	1	0	0	0	0	0	0	0	0	0	0	0	0	0	0	0	0	0	0	0	0	1	1	1	0	2	0	2	2	0	0	0	0	2	1	0	1
1396	0	1	1	1	2	0	0	0	0	2	1	1	0	0	0	0	0	0	1	0	1	0	0	0	1	1	0	0	0	0	1	1	1	1	0	0	1	0	0	2	0	0	0	2	0	0	1	1	0
1397	0	2	0	0	1	1	1	1	0	1	2	1	1	0	0	2	1	1	1	1	1	0	1	1	0	1	0	0	0	0	2	0	1	1	1	1	1	0	0	0	0	1	0	0	1	1	2	0	1
1398	0	2	0	0	1	0	0	0	0	1	2	1	1	0	0	2	1	1	2	0	2	0	0	0	0	1	0	0	0	0	1	0	2	1	1	1	1	0	0	0	0	1	0	0	1	1	1	0	1
1399	1	1	0	0	0	2	2	2	0	1	0	1	1	0	0	1	1	1	1	0	0	1	0	0	1	0	0	0	0	1	0	0	1	0	0	0	1	0	0	1	1	2	1	1	0	0	0	0	1
1400	1	0	1	1	0	1	1	1	0	1	2	1	1	2	1	0	0	0	0	0	0	0	0	0	0	1	0	0	0	0	1	1	1	0	0	0	1	0	0	1	0	0	0	1	1	1	0	0	1
1401	1	0	1	1	0	1	1	1	0	1	2	0	0	2	1	0	0	0	0	0	0	0	0	0	0	1	0	0	0	0	1	1	1	0	0	0	1	0	0	1	0	0	0	1	1	1	0	0	1
1402	1	1	0	0	0	1	1	1	0	1	1	1	0	1	1	2	0	0	1	1	1	1	0	0	0	0	0	0	0	1	0	0	0	0	0	0	1	1	0	1	0	1	0	1	0	0	0	1	0
1403	1	1	0	0	0	1	1	1	0	1	1	1	0	1	1	2	0	0	1	1	1	1	0	0	0	0	0	0	0	1	0	0	0	0	0	0	1	1	0	1	0	1	0	1	0	0	0	1	0
1404	0	1	1	1	2	2	2	2	2	0	1	0	1	1	1	2	0	0	1	1	1	0	0	0	0	2	0	2	2	0	0	0	0	0	0	0	0	1	0	1	0	0	0	2	0	0	1	1	0
1405	1	0	1	1	0	0	0	0	0	1	1	2	0	1	1	2	0	0	1	1	1	1	0	0	0	0	0	0	0	1	0	0	0	0	0	0	0	1	0	1	0	0	0	2	0	0	1	1	0
1406	0	0	2	2	1	1	1	1	1	1	2	1	1	2	2	2	0	0	0	2	0	0	0	0	0	1	0	1	1	0	0	0	0	0	0	0	0	1	0	1	0	1	1	2	0	0	1	0	0
1407	1	1	0	0	0	1	1	1	1	0	0	1	0	0	0	2	0	0	1	1	1	1	0	0	0	1	0	1	1	1	0	0	0	0	0	0	0	1	0	1	0	0	0	2	0	0	1	1	0
1408	0	2	0	0	1	1	1	1	0	1	2	1	1	0	0	2	1	1	1	1	1	0	1	1	0	1	0	0	0	0	2	0	1	0	0	0	1	0	0	1	0	0	0	0	2	2	2	0	0
1409	0	2	0	0	1	1	1	1	1	2	1	1	1	0	0	0	1	1	2	0	2	0	0	0	0	1	0	0	0	0	1	0	2	0	0	0	1	0	0	1	0	2	0	0	0	0	0	1	0
1410	0	2	0	0	1	2	2	2	1	2	1	1	1	0	0	2	1	1	1	1	1	0	1	1	0	1	0	0	0	0	2	0	1	0	0	0	1	0	0	1	0	0	0	0	2	2	2	0	0
1411	0	1	1	1	2	2	2	2	1	0	0	0	1	1	1	2	0	0	0	2	0	0	0	0	0	2	0	2	2	0	0	0	0	0	0	0	1	0	0	1	0	2	2	1	0	0	0	0	0
1412	0	0	2	2	1	1	1	1	1	1	2	0	1	2	2	2	0	0	0	2	0	0	0	0	0	1	0	1	1	0	0	0	0	0	0	0	0	1	0	1	0	1	1	2	0	0	1	0	0
1413	1	0	1	1	0	1	1	1	0	1	2	0	0	2	1	0	0	0	0	0	0	0	0	0	0	1	0	0	0	0	1	1	1	0	0	0	0	1	0	0	0	0	0	0	2	2	0	0	1
1414	1	0	1	1	0	1	1	1	1	0	1	1	0	2	1	0	0	0	0	0	0	0	0	0	0	1	0	0	0	0	1	1	1	0	0	0	1	0	0	1	0	0	0	1	1	1	0	0	1
1415	1	0	1	1	0	1	1	1	1	0	1	1	0	2	1	0	0	0	0	0	0	0	0	0	0	1	0	0	0	0	1	1	1	0	0	0	1	0	0	1	0	0	0	1	1	1	0	0	1
1416	0	2	0	0	0	0	0	0	0	2	1	2	0	2	1	0	0	0	1	1	1	0	0	0	1	1	1	1	1	1	0	1	0	0	0	0	1	0	0	0	1	1	1	1	1	1	1	0	0
1417	0	2	0	0	0	1	1	1	0	1	2	2	0	2	1	0	1	1	1	0	1	0	0	0	1	0	0	0	0	0	0	0	0	1	0	0	0	1	0	0	0	1	0	0	1	1	0	0	0
1418	0	2	0	0	0	0	0	0	0	2	1	1	0	2	1	2	0	0	1	1	1	0	0	0	2	0	1	0	0	1	0	0	1	1	0	0	0	0	0	0	0	1	0	0	1	1	0	0	0
1419	0	2	0	0	0	1	1	1	0	1	2	2	0	2	1	1	1	1	1	0	1	0	0	0	1	0	0	0	0	0	0	0	0	1	0	0	0	1	0	0	0	1	0	0	1	1	0	0	0
1420	0	2	0	0	0	0	0	0	0	2	1	1	0	2	1	0	0	0	1	1	1	0	0	0	2	0	1	0	0	1	0	0	1	0	0	0	1	1	0	0	1	1	0	0	1	1	0	0	0
1421	0	2	0	0	0	0	0	0	0	2	1	1	0	2	1	0	0	0	1	1	1	0	0	0	2	0	1	0	0	1	0	0	1	0	0	0	1	1	0	0	1	1	0	0	1	1	0	0	0
1422	0	2	0	0	0	1	1	1	0	1	2	2	0	2	1	1	1	1	1	0	1	0	0	0	0	1	0	1	1	0	0	1	0	0	0	0	1	0	0	0	0	1	1	1	1	1	1	0	0
1423	1	0	1	1	0	1	1	1	0	1	2	0	1	2	1	0	0	0	1	0	1	0	0	0	1	0	0	0	0	0	0	1	0	0	0	0	1	0	0	1	1	0	0	2	0	0	1	0	1
1424	1	0	1	1	0	1	1	1	0	1	2	0	0	2	1	0	0	0	0	0	0	0	0	0	0	1	0	0	0	0	1	1	1	0	0	0	1	0	0	1	1	0	0	1	1	1	0	0	1
1425	1	0	1	1	0	1	1	1	1	0	1	1	1	2	1	0	0	0	2	0	2	0	0	0	1	1	0	1	1	0	0	2	0	0	0	0	1	1	0	0	1	0	0	1	1	1	1	0	1
1426	1	0	1	1	2	1	1	1	1	0	1	1	1	2	2	2	0	0	0	2	0	0	0	0	0	1	0	1	1	0	0	0	1	0	0	0	1	1	0	1	0	2	1	1	0	0	0	0	0
1427	0	1	1	1	1	2	2	2	1	1	2	0	1	2	2	2	0	0	0	2	0	0	0	0	0	1	0	1	1	0	0	0	0	0	0	0	1	1	0	1	0	2	1	1	0	0	0	0	0
1428	1	0	1	1	2	1	1	1	1	0	1	1	1	2	2	2	0	0	0	2	0	0	0	0	0	2	0	1	1	0	1	0	1	0	0	0	0	2	0	2	0	2	1	2	0	0	0	0	0
1429	2	0	0	0	0	0	0	0	0	0	0	2	0	1	1	2	0	0	1	1	1	1	0	0	0	1	0	0	0	1	1	0	1	0	0	0	1	1	0	2	0	1	0	2	0	0	0	1	0
1430	1	0	1	1	0	1	1	1	0	1	2	1	0	2	1	0	0	0	0	0	0	0	0	0	0	1	0	0	0	0	1	1	1	0	0	0	1	0	0	1	0	0	0	1	1	1	0	0	1
1431	1	0	1	1	0	1	1	1	0	1	2	0	1	2	1	0	0	0	2	0	2	0	0	0	1	1	0	1	1	0	0	2	0	0	0	0	1	1	0	0	1	0	0	1	1	1	1	0	1
1432	1	0	1	1	0	1	1	1	0	1	2	0	1	2	1	0	0	0	1	0	1	0	0	0	1	0	0	0	0	0	0	1	0	0	0	0	1	0	0	1	1	0	0	2	0	0	1	0	1
1433	1	0	1	1	0	1	1	1	0	1	2	0	0	2	1	0	0	0	0	0	0	0	0	0	0	1	0	0	0	0	1	1	1	0	0	0	1	0	0	1	0	0	0	1	1	1	0	0	1
1434	0	2	0	0	2	0	0	0	0	1	1	0	2	0	0	0	0	0	1	1	1	0	1	1	0	1	0	1	1	0	0	1	1	0	0	0	1	0	0	1	0	1	0	0	1	1	1	0	0
1435	0	2	0	0	2	2	2	2	1	2	2	0	2	0	0	1	1	1	1	1	1	0	1	1	1	0	0	0	0	0	2	1	1	0	0	0	1	0	0	1	1	2	0	1	0	0	0	0	0
1436	0	2	0	0	2	1	1	1	1	2	2	0	2	0	0	1	1	1	2	0	2	0	1	1	1	0	0	0	0	0	1	0	2	0	0	0	1	0	0	2	0	2	0	0	0	0	1	0	0
1437	0	2	0	0	2	1	1	1	0	1	1	0	2	0	0	0	0	0	0	2	0	0	1	1	0	1	0	1	1	0	1	1	0	0	0	0	1	0	0	1	0	1	0	0	1	1	1	0	0
1438	1	1	0	0	2	0	0	0	0	2	1	0	1	1	0	0	0	0	0	0	0	0	1	1	1	0	0	0	0	0	0	1	1	1	1	1	0	2	0	1	1	0	0	0	1	2	1	0	0
1439	1	1	0	0	2	0	0	0	0	2	1	0	1	1	0	1	0	0	1	0	1	0	2	2	0	0	0	0	0	0	0	0	1	1	0	0	0	0	0	2	0	0	0	1	1	1	2	0	0
1440	0	1	1	1	2	0	0	0	0	2	1	1	0	0	0	1	0	0	1	0	1	0	1	1	0	1	0	0	0	0	1	0	1	1	0	0	0	0	0	2	0	0	0	1	1	1	2	0	0
1441	2	0	0	0	2	0	0	0	0	1	1	0	1	1	0	1	0	0	1	0	1	0	2	2	0	0	0	0	0	0	0	0	1	1	0	0	0	0	0	2	0	0	0	1	1	1	2	0	0
1442	0	1	1	1	2	1	1	1	1	1	0	1	1	0	0	0	1	1	2	0	2	0	1	1	0	1	0	0	0	0	1	0	2	0	0	0	1	0	0	1	0	1	0	1	0	0	1	1	0
1443	1	1	0	0	2	1	1	1	1	2	0	0	1	0	0	0	1	1	1	0	1	0	0	0	1	1	0	0	0	0	1	0	2	1	1	1	1	0	0	0	1	1	0	0	1	1	0	1	0
1444	0	2	0	0	0	0	0	0	0	2	1	1	0	2	1	0	0	0	1	1	1	0	0	0	1	1	1	1	1	1	0	1	1	0	0	0	1	1	0	0	1	1	0	0	1	1	0	0	0
1445	0	2	0	0	0	0	0	0	0	2	1	1	0	2	1	0	0	0	1	1	1	0	0	0	1	1	1	1	1	1	0	1	1	0	0	0	1	1	0	0	1	1	0	0	1	1	0	0	0
1446	0	2	0	0	0	0	0	0	0	2	1	1	0	2	1	0	0	0	1	1	1	0	0	0	2	0	1	0	0	1	0	0	1	0	0	0	1	1	0	0	1	1	0	0	1	1	0	0	0
1447	0	2	0	0	0	1	1	1	0	1	2	2	0	2	1	2	1	1	1	0	1	0	0	0	0	1	0	1	1	0	0	1	0	1	0	0	0	0	0	0	0	1	1	1	1	1	1	0	0
1448	2	0	0	0	2	0	0	0	0	1	1	0	1	1	0	1	0	0	1	0	1	0	2	2	0	0	0	0	0	0	0	0	1	1	0	0	0	0	0	2	0	0	0	1	1	1	2	0	0
1449	0	1	1	1	0	1	1	1	0	1	1	1	1	1	0	2	1	1	0	0	0	0	0	0	1	0	1	0	0	1	0	1	1	0	0	0	0	0	0	1	1	1	1	1	1	1	0	0	0
1450	1	1	0	0	0	0	1	1	0	1	1	0	1	0	0	1	2	1	1	0	0	1	0	0	1	0	0	0	0	1	0	0	1	0	0	0	0	0	0	1	1	1	1	1	0	0	0	0	1
1451	1	1	0	0	0	2	2	2	0	1	0	1	1	0	0	2	0	0	0	0	0	0	0	0	2	0	1	0	0	1	0	0	1	0	0	0	0	0	0	1	1	2	1	1	0	0	0	0	0
1452	1	1	0	0	0	2	2	2	0	1	0	1	1	0	0	1	0	0	0	0	0	0	0	0	2	0	1	0	0	1	0	0	1	0	0	0	0	0	0	1	1	2	1	1	0	0	0	0	1
1453	0	2	0	0	1	0	0	0	0	1	2	1	1	0	0	1	1	1	2	0	2	0	0	0	0	1	0	0	0	0	1	0	2	1	1	1	1	0	0	0	0	1	0	0	1	1	1	0	1
1454	0	2	0	0	1	1	1	1	0	1	2	1	1	0	0	2	1	1	1	1	1	0	1	1	0	1	0	0	0	0	2	0	1	1	1	1	1	0	0	0	0	1	0	0	1	1	1	0	1
1455	0	2	0	0	1	1	1	1	1	2	1	1	1	0	0	2	1	1	2	0	2	0	0	0	0	1	0	0	0	0	1	0	2	1	1	1	1	0	0	0	0	1	0	0	1	1	1	0	1
1456	0	2	0	0	1	0	0	0	0	1	2	1	1	0	0	2	1	1	2	0	2	0	0	0	0	1	0	0	0	0	1	0	2	1	1	1	1	0	0	0	0	1	0	0	1	1	1	0	1
1457	1	1	0	0	0	2	2	2	0	1	0	1	1	0	0	1	0	0	0	0	0	0	0	0	2	0	1	0	0	1	0	0	1	0	0	0	0	0	0	1	1	2	1	1	0	0	0	0	1
1458	1	1	0	0	0	1	1	1	0	1	1	0	1	0	0	2	1	1	0	0	0	0	0	0	1	0	1	0	0	1	0	1	1	0	0	0	0	0	0	1	1	1	1	1	1	1	0	0	0
1459	0	1	1	1	0	1	1	1	0	1	1	1	1	1	0	2	1	1	0	0	0	0	0	0	1	0	1	0	0	1	0	1	1	0	0	0	0	0	0	1	1	1	1	1	1	1	0	0	0
1460	0	1	1	1	0	1	1	1	0	1	1	1	1	1	0	1	1	1	0	0	0	0	0	0	1	0	1	0	0	1	0	1	1	0	0	0	0	0	0	1	1	1	1	1	1	1	0	0	1
1461	1	0	1	1	0	1	1	1	1	0	1	1	0	2	1	0	0	0	1	0	1	0	0	0	1	1	0	1	1	0	0	2	0	0	0	0	1	1	0	0	1	0	0	1	1	1	1	0	1
1462	1	0	1	1	0	1	1	1	0	1	2	0	0	2	1	0	0	0	0	0	0	0	0	0	0	1	0	0	0	0	1	1	1	0	0	0	0	1	0	0	0	0	0	1	1	1	0	0	1
1463	1	0	1	1	0	1	1	1	1	0	1	1	0	2	1	0	0	0	1	0	1	0	0	0	0	2	0	1	1	0	1	2	1	0	0	0	0	1	0	0	0	0	0	0	2	2	0	0	1
1464	0	2	0	0	2	0	0	0	0	1	1	0	2	1	0	0	0	0	1	1	1	0	1	1	0	1	0	1	1	0	0	1	0	0	0	0	1	0	0	1	0	1	0	0	1	1	1	0	0
1465	0	2	0	0	2	2	2	2	1	2	2	0	2	1	0	1	1	1	1	1	1	0	1	1	1	0	0	0	0	0	2	1	1	0	0	0	1	0	0	0	1	2	0	1	0	0	0	0	0
1466	0	2	0	0	2	1	1	1	0	1	1	0	2	0	0	1	0	0	0	2	0	0	1	1	0	1	0	1	1	0	1	1	0	0	0	0	1	0	0	0	1	1	0	1	1	1	0	0	0
1467	0	2	0	0	2	1	1	1	1	2	2	0	2	0	0	1	1	1	2	0	2	0	1	1	1	0	0	0	0	0	1	1	2	0	0	0	1	0	0	1	0	2	0	0	0	0	1	0	0
1468	1	1	0	0	0	1	1	1	0	1	1	1	0	1	1	2	0	0	0	2	0	0	0	0	0	2	0	1	1	0	1	0	0	0	0	0	0	2	0	2	0	2	1	2	0	0	0	0	0
1469	1	0	1	1	2	1	1	1	1	0	1	1	1	2	2	2	0	0	0	2	0	0	0	0	0	2	0	1	1	0	1	0	1	0	0	0	0	2	0	2	0	2	1	2	0	0	0	0	0
1470	2	0	0	0	2	0	0	0	0	0	0	2	0	1	1	2	0	0	1	1	1	1	0	0	0	1	0	0	0	1	1	0	1	0	0	0	0	2	0	2	0	1	0	2	0	0	0	1	0
1471	1	0	1	1	1	2	2	2	1	1	2	0	1	2	2	2	0	0	0	2	0	0	0	0	0	2	0	1	1	0	1	0	0	0	0	0	0	2	0	2	0	2	1	2	0	0	0	0	0
1472	0	1	1	1	2	0	0	0	0	0	1	1	1	0	0	0	1	1	2	0	2	0	1	1	0	1	0	0	0	0	1	0	2	0	0	0	1	0	0	1	0	1	0	1	0	0	1	1	0
1473	1	1	0	0	2	1	1	1	1	2	0	0	1	0	0	0	1	2	1	0	1	0	0	0	1	1	0	0	0	0	1	0	2	1	1	1	1	0	0	0	1	1	0	0	1	1	0	1	0
1474	0	1	1	1	2	1	1	1	1	1	0	1	1	0	0	0	1	1	2	0	2	0	1	1	0	1	0	0	0	0	1	0	2	0	0	0	1	0	0	1	0	1	0	1	0	0	1	1	0
1475	1	1	0	0	2	1	1	1	1	2	0	0	1	0	0	1	1	1	1	0	1	0	0	0	1	1	0	0	0	0	1	0	2	1	1	1	1	0	0	0	1	1	0	0	1	1	0	1	0
1476	1	1	0	0	0	1	1	1	0	1	1	1	1	0	0	1	1	1	1	0	0	1	0	0	1	0	0	0	0	1	0	0	1	0	0	0	0	0	0	1	1	2	1	1	0	0	0	0	1
1477	1	1	0	0	2	0	0	0	0	1	1	1	1	0	0	0	1	1	1	0	1	0	0	0	1	1	0	0	0	0	1	0	2	1	1	1	1	0	0	0	1	0	0	0	2	2	1	0	0
1478	1	1	0	0	2	0	0	0	0	1	1	0	1	0	0	0	2	1	1	0	1	0	0	0	1	1	0	0	0	0	1	0	2	1	1	1	1	0	0	0	1	0	0	0	2	2	1	0	0
1479	1	1	0	0	2	0	0	0	0	1	1	1	1	0	0	0	1	1	1	0	1	0	0	0	1	1	0	0	0	0	1	0	2	1	1	1	1	0	0	0	1	0	0	0	2	2	1	0	0
1480	0	1	1	1	2	0	0	0	0	0	1	1	1	0	0	1	1	1	1	0	1	0	0	0	1	1	0	0	0	0	1	0	2	1	1	1	1	0	0	0	1	0	0	0	2	2	1	0	0
1481	1	1	0	0	0	1	1	1	1	0	0	1	0	0	0	2	0	0	1	1	1	1	0	0	0	1	0	1	1	1	0	1	0	0	0	0	0	1	0	1	0	0	0	1	1	1	0	1	0
1482	1	0	1	1	0	0	0	0	0	1	1	1	1	1	1	1	0	0	1	1	1	1	0	0	0	0	0	0	0	1	0	0	0	0	0	0	0	1	0	1	0	1	1	2	0	0	1	0	0
1483	0	1	1	1	2	2	2	2	2	0	1	0	1	1	1	2	0	0	0	2	0	0	0	0	0	2	0	2	2	0	0	0	0	0	0	0	0	1	0	1	0	1	1	1	1	1	0	0	0
1484	1	0	1	1	0	0	0	0	0	1	1	1	0	1	1	2	0	0	1	1	1	1	0	0	0	0	0	0	0	1	0	0	0	0	0	0	0	1	0	1	0	0	0	2	0	0	1	1	0
1485	0	2	0	0	2	1	1	1	1	2	2	0	2	0	0	0	1	1	1	1	1	0	1	1	1	0	0	0	0	0	2	1	2	0	0	0	1	0	0	1	1	2	0	1	0	0	0	0	0
1486	0	2	0	0	2	2	2	2	1	2	2	0	2	1	0	1	1	1	2	0	2	0	1	1	1	0	0	0	0	0	1	1	1	0	0	0	1	0	0	2	0	2	0	0	0	0	1	0	0
1487	0	2	0	0	2	1	1	1	0	1	1	0	2	1	0	1	0	0	0	2	0	0	1	1	0	1	0	1	1	0	1	1	0	0	0	0	1	0	0	1	0	1	0	0	1	1	1	0	0
1488	0	2	0	0	2	1	1	1	1	2	2	0	2	0	0	1	1	1	1	1	1	0	1	1	1	0	0	0	0	0	2	1	2	0	0	0	1	0	0	1	1	2	0	1	0	0	0	0	0
1489	0	1	1	1	2	0	0	0	0	2	1	1	0	0	0	1	0	0	1	0	1	0	0	0	1	1	0	0	0	0	1	1	1	1	0	0	1	0	0	1	1	0	0	1	0	1	0	1	0
1490	0	2	0	0	2	1	1	1	0	0	1	0	2	1	0	1	1	1	1	1	1	0	1	1	1	0	0	0	0	1	1	0	1	0	0	0	1	0	0	0	0	1	0	0	1	1	0	1	0
1491	0	1	1	1	2	0	0	0	0	2	1	1	0	0	0	0	0	0	1	0	1	0	0	0	1	1	0	0	0	0	1	1	1	1	1	1	0	2	0	1	1	0	0	1	0	1	0	1	0
1492	2	0	0	0	2	0	0	0	0	1	1	0	1	1	0	1	0	0	1	0	1	0	2	2	0	0	0	0	0	0	0	0	1	1	0	0	1	0	0	2	0	0	0	2	0	0	1	1	0
21527	0	1	1	1	1	0	0	0	0	1	2	0	1	0	0	2	2	2	2	0	2	0	0	0	1	1	0	0	0	0	1	0	0	0	0	0	1	0	0	0	0	2	0	0	0	0	2	0	0
1493	0	1	1	1	2	2	2	2	2	0	1	1	1	2	2	2	0	0	0	2	0	0	0	0	0	2	0	2	2	0	0	0	0	0	0	0	1	1	0	1	0	2	2	1	0	0	0	0	0
1494	0	1	1	1	2	2	2	2	2	0	1	0	1	1	1	2	0	0	0	2	0	0	0	0	0	2	0	2	2	0	0	0	0	0	0	0	1	1	0	1	0	1	1	1	1	1	0	0	0
1495	1	1	0	0	2	1	1	1	1	0	0	1	0	0	0	2	0	0	1	1	1	1	0	0	0	1	0	1	1	1	0	0	0	0	0	0	1	1	0	1	0	0	0	1	1	1	0	1	0
1496	0	1	1	1	2	2	2	2	2	0	1	0	1	1	1	2	0	0	0	2	0	0	0	0	0	1	0	1	1	0	0	0	0	0	0	0	0	1	0	1	0	1	1	2	0	0	1	0	0
1497	0	2	0	0	2	1	1	1	1	2	2	0	2	0	0	0	1	1	1	1	1	0	1	1	1	0	0	0	0	0	2	1	2	0	0	0	1	0	0	0	1	1	0	1	1	1	0	0	0
1498	0	2	0	0	2	1	1	1	1	2	2	0	2	0	0	0	2	1	2	0	2	0	1	1	1	0	0	0	0	0	1	1	2	0	0	0	1	0	0	2	0	2	0	0	0	0	1	0	0
1499	0	2	0	0	2	0	0	0	0	1	1	0	2	0	0	0	0	0	1	1	1	0	1	1	0	1	0	1	1	0	0	1	1	0	0	0	1	0	0	1	0	2	0	0	0	0	1	0	0
1500	0	2	0	0	2	2	2	2	1	2	2	0	2	1	0	0	1	1	1	1	1	0	1	1	1	0	0	0	0	0	2	1	1	0	0	0	1	0	0	1	1	2	0	1	0	0	0	0	0
1501	0	0	2	2	1	1	1	1	1	1	2	1	1	2	2	2	0	0	0	2	0	0	0	0	0	1	0	1	1	0	0	0	0	0	0	0	1	1	0	1	0	1	1	2	0	0	1	0	0
1502	0	0	2	2	1	1	1	1	1	1	2	1	1	2	2	2	0	0	0	2	0	0	0	0	0	1	0	1	1	0	0	0	0	0	0	0	0	1	0	1	0	0	0	2	0	0	1	1	0
1503	0	0	2	2	1	1	1	1	1	1	2	0	1	1	1	2	0	0	0	2	0	0	0	0	0	1	0	1	1	0	0	0	0	0	0	0	0	2	0	1	0	1	1	2	0	0	1	0	0
1504	0	1	1	1	2	2	2	2	2	0	1	1	1	2	2	2	0	0	0	2	0	0	0	0	0	2	0	2	2	0	0	0	0	0	0	0	1	1	0	1	0	1	1	1	1	1	0	0	0
1505	0	2	0	0	0	1	1	1	0	1	2	2	0	2	1	1	1	1	1	0	1	0	0	0	0	1	0	1	1	0	0	1	0	1	0	0	0	1	0	0	0	1	1	1	1	1	1	0	0
1506	0	2	0	0	0	1	1	1	0	1	2	2	0	2	1	1	1	1	1	0	1	0	0	0	0	1	0	1	1	0	0	1	0	1	0	0	0	1	0	0	0	1	0	0	1	1	0	0	0
1507	0	2	0	0	0	0	0	0	0	2	1	1	0	2	1	0	0	0	1	1	1	0	0	0	2	0	1	0	0	1	0	0	1	0	0	0	1	1	0	0	1	1	0	0	1	1	0	0	0
1508	0	2	0	0	0	0	0	0	0	2	1	2	0	2	1	1	0	0	1	1	1	0	0	0	2	0	1	0	0	1	0	0	1	0	0	0	1	1	0	0	1	1	0	0	1	1	0	0	0
1509	1	1	0	0	2	0	0	0	0	1	1	0	1	0	0	0	1	1	1	0	1	0	0	0	1	1	0	0	0	0	1	0	2	1	1	1	1	0	0	0	1	0	0	0	2	2	1	0	0
1510	1	1	0	0	2	1	1	1	1	2	0	0	1	0	0	0	1	1	1	0	1	0	0	0	1	1	0	0	0	0	1	0	2	1	1	1	1	0	0	0	1	1	0	0	1	1	0	1	0
1511	0	1	1	1	2	0	0	0	0	0	1	1	1	0	0	1	1	1	2	0	2	0	1	1	0	1	0	0	0	0	1	0	2	0	0	0	1	0	0	1	0	0	0	1	1	1	2	0	0
1512	1	1	0	0	2	0	0	0	0	1	1	0	1	0	0	0	1	1	1	0	1	0	0	0	1	1	0	0	0	0	1	0	2	1	1	1	1	0	0	0	1	0	0	0	2	2	1	0	0
1513	1	1	0	0	2	1	1	1	1	0	0	0	1	0	0	2	0	0	1	1	1	1	0	0	0	1	0	1	1	1	0	0	0	0	0	0	1	1	0	1	0	0	0	1	1	1	0	1	0
1514	0	0	2	2	1	1	1	1	1	1	2	1	1	2	2	1	0	0	0	2	0	0	0	0	0	1	0	1	1	0	0	0	0	0	0	0	0	1	0	1	0	1	1	2	0	0	1	0	0
1515	1	0	1	1	0	0	0	0	0	1	1	2	0	1	1	2	0	0	1	1	1	1	0	0	0	0	0	0	0	1	0	0	0	0	0	0	1	1	0	1	0	0	0	1	1	1	0	1	0
1516	0	1	1	1	2	2	2	2	2	0	2	1	0	1	1	0	0	0	0	2	0	0	0	0	0	2	0	2	2	0	0	0	0	0	0	0	0	0	0	0	0	2	1	0	0	0	0	0	0
1517	0	2	0	0	2	0	0	0	0	2	1	1	0	2	1	0	0	0	1	1	1	0	0	0	2	0	1	0	0	1	0	0	1	0	0	0	1	1	0	0	1	1	0	0	1	1	0	0	0
1518	0	2	0	0	0	0	0	0	0	2	1	1	0	2	1	1	0	0	1	1	1	0	0	0	2	0	1	0	0	1	0	0	1	1	0	0	0	1	0	0	1	1	0	0	1	1	0	0	0
1519	0	2	0	0	0	0	0	0	0	2	1	1	0	2	1	2	1	1	1	0	1	0	0	0	1	1	1	1	1	1	0	1	1	1	0	0	0	0	0	0	0	1	1	1	1	1	1	0	0
1520	0	2	0	0	0	0	0	0	0	2	1	1	0	2	1	1	0	0	1	1	1	0	0	0	2	0	1	0	0	1	0	0	1	0	0	0	1	0	0	0	1	1	1	1	1	1	1	0	0
1521	0	2	0	0	0	1	1	1	0	1	2	2	0	2	1	0	1	1	1	0	1	0	0	0	0	1	0	1	1	0	0	1	0	0	0	0	1	1	0	0	0	1	1	1	1	1	1	0	0
1522	0	2	0	0	0	1	1	1	0	1	2	2	0	2	1	1	1	1	1	0	1	0	0	0	1	0	0	0	0	0	0	0	0	1	0	0	0	1	0	0	0	1	0	0	1	1	0	0	0
1523	0	2	0	0	0	0	0	0	0	2	1	1	0	2	1	2	0	0	1	1	1	0	0	0	2	0	1	0	0	1	0	0	1	0	0	0	1	0	0	0	1	1	0	0	1	1	0	0	0
1524	0	2	0	0	0	0	0	0	0	2	1	1	0	2	1	0	0	0	1	1	1	0	0	0	1	1	1	1	1	1	0	1	1	0	0	0	1	0	0	0	1	1	1	1	1	1	1	0	0
1525	1	0	1	1	0	1	1	1	1	0	1	1	0	2	1	0	0	0	1	0	1	0	0	0	0	2	0	1	1	0	1	2	1	0	0	0	0	1	0	0	0	0	0	0	2	2	0	0	1
1526	1	0	1	1	0	1	1	1	0	0	1	1	0	2	1	0	0	0	1	0	1	0	0	0	0	2	0	1	1	0	1	2	1	0	0	0	0	1	0	0	0	0	0	0	2	2	0	0	1
1527	1	0	1	1	0	1	1	1	0	1	2	0	1	2	1	0	0	0	1	0	1	0	0	0	1	0	0	0	0	0	0	1	0	0	0	0	1	1	0	0	1	0	0	2	0	0	1	0	1
1528	1	0	1	1	0	1	1	1	0	1	2	0	0	2	1	0	0	0	2	0	2	0	0	0	1	1	0	1	1	0	0	2	1	0	0	0	1	1	0	0	1	0	0	1	1	1	1	0	1
1529	1	0	1	1	2	1	1	1	1	0	1	1	1	2	2	2	0	0	0	2	0	0	0	0	0	2	0	1	1	0	1	0	1	0	0	0	0	2	0	2	0	2	2	1	0	0	0	0	0
1530	0	1	1	1	1	2	2	2	1	1	2	0	1	2	2	2	0	0	0	2	0	0	0	0	0	1	0	1	1	0	0	0	0	0	0	0	1	1	0	1	0	2	1	1	0	0	0	0	0
1531	1	0	1	1	2	1	1	1	1	0	1	2	0	2	2	2	0	0	0	2	0	0	0	0	0	1	0	1	1	0	0	0	1	0	0	0	1	1	0	1	0	2	1	1	0	0	0	0	0
1532	2	0	0	0	2	0	0	0	0	0	0	2	0	1	1	2	0	0	1	1	1	1	0	0	0	0	0	0	0	1	0	0	1	0	0	0	1	1	0	1	0	1	0	1	0	0	0	1	0
1533	0	2	0	0	1	0	0	0	0	1	2	1	1	0	0	2	1	1	2	0	2	0	0	0	0	1	0	0	0	0	1	0	2	1	1	1	1	0	0	0	0	1	0	0	1	1	1	0	1
1534	0	2	0	0	1	1	1	1	0	1	2	1	1	0	0	0	1	1	0	2	0	0	1	1	0	1	0	0	0	0	2	0	1	0	0	0	0	0	0	1	0	0	0	0	0	0	2	0	0
1535	0	2	0	0	1	1	1	1	1	2	1	1	1	0	0	1	1	0	2	0	2	0	0	0	0	1	0	0	0	0	1	0	2	1	1	1	1	0	0	0	0	0	0	0	0	1	0	1	1
1536	0	2	0	0	1	0	0	0	0	1	2	1	1	0	0	1	1	1	2	0	2	0	0	0	0	1	0	0	0	0	1	0	2	1	1	1	1	0	0	0	0	2	0	0	0	0	0	1	1
1537	1	1	0	0	0	2	2	2	0	1	0	1	1	0	0	1	0	0	0	0	0	0	0	0	2	0	1	0	0	1	0	0	1	0	0	0	0	0	0	1	1	2	1	1	0	0	0	0	1
1538	1	1	0	0	0	2	2	2	0	1	0	1	1	0	0	2	2	1	0	0	0	0	0	0	1	0	1	0	0	1	0	0	1	0	0	0	0	0	0	1	1	1	1	1	1	1	0	0	0
1539	1	1	0	0	0	2	2	2	0	1	0	0	1	0	0	2	0	0	0	0	0	0	0	0	2	0	1	0	0	1	0	0	1	0	0	0	0	0	0	1	1	2	1	1	0	0	0	0	0
1540	0	2	0	0	2	0	1	1	0	1	1	0	2	1	0	0	0	0	1	1	1	0	1	1	0	1	0	1	1	0	0	0	0	0	0	0	1	0	0	1	0	2	0	0	0	0	1	0	0
1541	0	2	0	0	2	0	0	0	0	1	1	0	2	0	0	1	0	0	0	2	0	0	1	1	0	1	0	1	1	0	1	1	1	0	0	0	1	0	0	0	1	1	0	1	1	1	0	0	0
1542	0	2	0	0	2	1	1	1	0	1	1	0	2	1	0	0	0	0	0	2	0	0	1	1	0	1	0	1	1	0	1	1	1	0	0	0	1	0	0	0	1	1	0	1	1	1	0	0	0
1543	0	2	0	0	2	1	1	1	0	1	1	0	2	1	0	1	0	0	1	1	1	0	1	1	0	1	0	1	1	0	0	1	1	0	0	0	1	0	0	1	0	1	0	0	1	1	1	0	0
1544	0	2	0	0	2	1	1	1	1	2	2	0	2	0	0	0	0	0	1	1	1	0	1	1	0	1	0	1	1	0	0	1	2	0	0	0	1	0	0	1	0	1	0	0	1	1	1	0	0
1545	0	2	0	0	2	2	2	2	1	2	2	0	2	1	0	1	1	1	1	1	1	0	1	1	1	0	0	0	0	0	2	1	1	0	0	0	1	0	0	1	1	2	0	1	0	0	0	0	0
1546	0	2	0	0	2	2	2	2	1	2	2	0	2	1	0	1	0	0	1	1	1	0	1	1	1	0	0	0	0	0	1	1	1	0	0	0	1	0	0	1	0	1	0	0	1	1	1	0	0
1547	0	2	0	0	2	1	1	1	1	2	2	0	2	0	0	1	0	0	0	2	0	0	1	1	0	1	0	1	1	0	1	1	2	0	0	0	1	0	0	0	1	1	0	1	1	1	0	0	0
1548	1	1	0	0	0	2	2	2	0	1	0	1	1	1	0	1	0	0	0	0	0	0	0	0	2	0	1	0	0	1	0	0	1	0	0	0	0	0	0	1	2	2	1	1	0	0	0	0	1
1549	1	1	0	0	0	1	1	1	0	1	1	0	1	0	0	2	2	2	1	0	0	1	0	0	0	0	0	0	0	1	0	0	1	0	0	0	1	0	0	1	1	1	1	1	1	1	0	0	0
1550	0	1	1	1	0	1	1	1	0	1	1	1	1	1	0	1	1	1	0	0	0	0	0	0	1	0	1	0	0	1	0	1	1	0	0	0	0	0	0	1	1	1	1	1	1	1	0	0	1
1551	0	1	0	0	0	0	0	0	0	1	2	0	1	1	0	2	2	2	1	0	0	1	0	0	0	0	0	0	0	1	0	1	1	0	0	0	1	0	0	1	0	2	1	1	0	0	0	0	0
1552	0	1	1	1	0	2	2	2	2	1	1	1	1	2	1	0	0	0	0	1	0	0	0	0	0	1	0	0	0	0	0	0	1	0	0	0	1	1	0	1	0	0	0	1	1	1	1	0	0
1553	0	1	1	1	1	2	2	2	1	1	1	1	0	1	1	1	0	0	0	0	0	0	0	0	1	0	0	0	0	0	0	1	0	0	0	0	0	2	0	1	0	0	0	1	0	1	1	0	0
1554	0	1	1	1	0	2	2	2	1	2	2	0	1	2	1	0	0	0	0	1	0	0	0	0	0	1	0	0	0	0	0	0	1	0	0	0	1	1	0	1	0	0	0	1	1	1	1	0	0
1555	0	1	1	1	1	2	2	2	1	1	1	1	0	1	1	0	0	0	0	0	0	0	0	0	1	0	0	0	0	0	0	1	0	0	0	0	1	1	0	1	0	0	0	1	0	1	1	0	0
1556	0	2	0	0	1	0	0	0	0	2	2	1	1	0	0	2	2	1	2	0	2	0	0	0	0	1	0	0	0	0	1	0	2	2	1	1	1	0	0	0	0	2	0	0	0	0	1	0	0
1557	0	2	0	0	1	0	0	0	0	1	2	1	1	0	0	2	1	1	1	1	1	0	1	1	0	1	0	0	0	0	2	0	2	0	0	0	1	0	0	1	0	0	0	0	2	2	2	0	0
1558	0	2	0	0	1	0	0	0	0	1	2	1	1	0	0	2	1	1	2	0	2	0	0	0	0	1	0	0	0	0	1	0	2	1	1	1	1	0	0	0	0	1	0	0	1	1	1	0	1
1559	0	2	0	0	1	0	0	0	0	1	2	1	1	0	0	2	1	1	2	0	2	0	0	0	0	1	0	0	0	0	1	0	2	1	1	1	1	0	0	0	0	2	0	0	0	0	1	0	1
1560	1	1	0	0	2	0	0	0	0	2	1	0	1	1	0	0	0	0	0	0	0	0	1	1	1	0	0	0	0	0	0	1	1	1	1	1	0	2	0	1	1	0	0	0	0	2	1	0	0
1561	2	0	0	0	2	0	0	0	0	1	1	0	1	1	0	1	0	0	1	0	1	0	2	2	0	0	0	0	0	0	0	0	1	1	0	0	0	0	0	2	0	0	0	1	1	1	2	0	0
1562	1	0	1	1	2	0	0	0	0	1	1	1	0	0	0	1	0	0	1	0	1	0	2	2	0	0	0	0	0	0	0	0	1	1	0	0	0	0	0	2	0	0	0	1	1	1	2	0	0
1563	2	0	0	0	2	0	0	0	0	1	1	1	0	1	0	1	0	0	1	0	1	0	2	2	0	0	0	0	0	0	0	0	1	1	0	0	0	0	0	2	0	0	0	1	1	1	2	0	0
1564	0	2	0	0	2	0	0	0	0	2	0	1	0	2	1	2	0	0	1	1	1	0	0	0	2	0	1	0	0	1	0	0	1	1	0	0	0	0	0	0	0	2	0	0	0	0	0	0	0
1565	0	2	0	0	0	1	1	1	0	1	2	2	0	2	1	0	0	0	1	1	1	0	0	0	2	0	1	0	0	1	0	0	0	0	0	0	1	1	0	0	1	1	0	0	1	1	0	0	0
1566	0	2	0	0	0	0	0	0	0	2	1	1	0	2	1	2	0	0	1	1	1	0	0	0	2	0	1	0	0	1	0	0	1	1	0	0	0	0	0	0	0	1	0	0	1	1	0	0	0
1567	0	2	0	0	0	1	1	1	0	1	2	2	0	2	1	1	1	1	1	0	1	0	0	0	1	0	0	0	0	0	0	0	0	1	0	0	0	1	0	0	0	1	0	0	1	1	0	0	0
1568	0	1	1	1	2	1	1	1	0	1	1	1	1	1	0	1	0	0	0	0	0	0	0	0	2	0	1	0	0	1	0	0	1	0	0	0	0	0	0	1	1	2	1	1	0	0	0	0	1
1569	0	1	1	1	0	2	2	2	2	1	1	1	1	2	1	0	0	0	1	1	1	0	0	0	0	2	0	1	1	0	0	1	1	0	0	0	0	2	0	0	0	0	0	0	2	2	1	0	0
1570	0	1	1	1	1	2	2	2	1	1	1	1	0	1	1	0	0	0	0	0	0	0	0	0	1	0	0	0	0	0	0	1	0	0	0	0	1	1	0	1	0	0	0	1	0	1	1	0	0
1571	0	1	1	1	0	2	2	2	1	2	2	0	1	2	1	0	0	0	0	1	0	0	0	0	0	1	0	0	0	0	0	0	1	0	0	0	1	1	0	1	0	0	0	1	1	1	1	0	0
1572	0	1	2	2	1	2	2	2	1	1	1	1	0	1	1	0	0	0	0	0	0	0	0	0	1	0	0	0	0	0	0	1	0	0	0	0	1	1	0	1	0	0	0	1	0	1	1	0	0
1573	1	1	0	0	2	0	0	0	0	2	1	0	1	1	0	0	0	0	0	0	0	0	1	1	1	0	0	0	0	0	0	1	1	1	1	1	0	2	0	1	1	0	0	0	1	2	1	0	0
1574	0	1	1	1	2	0	0	0	0	2	1	1	0	0	0	0	0	0	1	0	1	0	0	0	1	1	0	0	0	0	1	1	1	1	1	1	1	1	0	1	1	0	0	1	0	1	0	1	0
1575	2	0	0	0	2	0	0	0	0	1	1	1	0	0	0	1	0	0	1	0	1	0	2	2	0	0	0	0	0	0	0	0	1	1	0	0	0	0	0	2	0	0	0	1	1	1	2	0	0
1576	1	0	1	1	2	0	0	0	0	1	1	1	0	0	0	0	0	0	1	0	1	0	1	1	0	1	0	0	0	0	1	0	1	1	1	1	1	1	0	1	1	0	0	1	0	0	0	1	0
1577	0	1	1	1	2	1	1	1	1	1	0	0	1	0	0	0	1	1	2	0	2	0	1	1	0	1	0	0	0	0	1	0	2	0	0	0	1	0	0	1	0	1	0	1	0	0	1	1	0
1578	1	1	0	0	2	1	1	1	1	2	0	0	1	0	0	0	1	1	1	0	1	0	0	0	1	1	0	0	0	0	1	0	2	1	1	1	1	0	0	0	1	0	0	0	2	2	1	0	0
1579	0	1	1	1	2	1	1	1	1	1	0	1	1	0	0	0	1	1	2	0	2	0	1	1	0	1	0	0	0	0	1	0	2	0	0	0	1	0	0	1	0	1	0	1	0	0	1	1	0
1580	1	1	0	0	2	1	1	1	1	2	0	0	1	0	0	0	1	1	1	0	1	0	0	0	1	1	0	0	0	0	1	0	2	1	1	1	1	0	0	0	1	1	0	0	1	1	0	1	0
1581	0	1	1	1	0	2	2	2	2	1	1	1	1	2	1	1	0	0	0	1	0	0	0	0	0	1	0	0	0	0	0	0	1	0	0	0	1	1	0	1	0	0	0	1	1	1	1	0	0
1582	0	1	1	1	0	2	2	2	2	1	1	1	1	2	1	1	0	0	1	1	1	0	0	0	0	2	0	1	1	0	0	1	1	0	0	0	0	2	0	0	0	0	0	0	2	2	1	0	0
1583	0	1	1	1	1	2	2	2	1	1	1	1	0	1	1	0	0	0	0	0	0	0	0	0	1	0	0	0	0	0	0	1	0	0	0	0	1	1	0	1	0	0	0	1	0	1	1	0	0
1584	0	1	1	1	2	2	2	2	2	0	0	2	0	1	1	0	0	0	1	0	1	0	0	0	1	1	0	1	1	0	0	2	0	0	0	0	0	2	0	0	0	0	0	0	1	2	1	0	0
1585	0	1	1	1	0	2	2	2	1	2	2	1	1	2	1	1	0	0	0	1	0	0	0	0	0	1	0	0	0	0	0	0	1	0	0	0	1	1	0	1	0	0	0	1	1	1	1	0	0
1586	0	1	1	1	2	2	2	2	2	0	0	1	0	1	1	0	0	0	1	0	1	0	0	0	1	1	0	1	1	0	0	2	0	0	0	0	0	2	0	0	0	0	0	0	1	2	1	0	0
1587	0	1	1	1	0	2	2	2	1	2	2	0	1	2	1	0	0	0	0	1	0	0	0	0	0	1	0	0	0	0	0	0	1	0	0	0	1	1	0	1	0	0	0	1	1	1	1	0	0
1588	0	1	1	1	0	2	2	2	2	1	1	0	1	2	1	0	0	0	1	1	1	0	0	0	0	2	0	1	1	0	0	1	1	0	0	0	0	2	0	0	0	0	0	0	2	2	1	0	0
1589	1	1	0	0	2	0	0	0	0	2	1	0	1	1	0	0	0	0	1	0	1	0	0	0	1	1	0	0	0	0	1	1	1	1	1	1	1	1	0	1	1	0	0	1	0	1	0	1	0
1590	2	0	0	0	2	0	0	0	0	1	1	0	1	1	0	1	0	0	1	0	1	0	2	2	0	0	0	0	0	0	0	0	1	1	0	0	0	0	0	2	0	0	0	2	0	0	2	0	0
1591	2	0	0	0	2	0	0	0	0	1	1	1	0	0	0	1	0	0	1	0	1	0	2	2	0	0	0	0	0	0	0	0	1	1	0	0	0	0	0	2	0	0	0	1	1	1	2	0	0
1592	2	0	0	0	2	0	0	0	0	1	1	0	1	1	0	0	0	0	1	0	1	0	2	2	0	0	0	0	0	0	0	0	1	1	1	1	0	2	0	2	0	0	0	1	1	1	2	0	0
1593	0	2	0	0	2	2	2	2	1	2	2	0	2	1	0	0	1	1	1	1	1	0	1	1	1	0	0	0	0	0	2	1	1	0	0	0	1	0	0	1	1	2	0	1	0	0	0	0	0
1594	0	2	0	0	2	0	0	0	0	1	1	0	2	0	0	1	0	0	1	2	0	0	1	1	0	1	0	1	1	0	1	1	1	0	0	0	1	0	0	0	1	1	0	1	1	1	1	0	0
1595	0	2	0	0	2	1	1	1	0	1	1	0	2	0	0	1	0	0	0	2	0	0	1	1	0	1	0	1	1	0	1	1	0	0	0	0	1	0	0	0	1	1	0	1	1	1	0	0	0
1596	0	2	0	0	2	1	1	1	1	2	2	0	2	0	0	1	1	1	2	0	2	0	1	1	1	0	0	0	0	0	1	1	2	0	0	0	1	0	0	2	0	2	0	0	0	0	1	0	0
1597	1	1	0	0	0	1	1	1	0	1	1	1	0	1	1	2	0	0	1	1	1	1	0	0	0	0	0	0	0	1	0	0	0	0	0	0	1	1	0	1	0	1	0	1	0	0	0	1	0
1598	1	0	1	1	2	1	1	1	1	0	1	1	1	2	2	2	0	0	0	2	0	0	0	0	0	1	0	1	1	0	0	0	1	0	0	0	1	1	0	1	0	2	1	1	0	0	0	0	0
1599	0	1	1	1	1	2	2	2	1	1	2	2	0	2	2	2	0	0	0	2	0	0	0	0	0	1	0	1	1	0	0	0	1	0	0	0	1	1	0	1	0	2	1	1	0	0	0	0	0
1600	2	0	0	0	2	0	0	0	0	0	0	1	1	1	1	2	0	0	1	1	1	1	0	0	0	1	0	0	0	1	1	0	1	0	0	0	0	2	0	2	0	1	0	2	0	0	0	1	0
1601	0	1	1	1	2	2	2	2	2	0	0	2	0	1	1	1	0	0	1	0	1	0	0	0	1	1	0	1	1	0	0	2	0	0	0	0	0	2	0	0	0	0	0	0	1	2	1	0	0
1602	0	1	1	1	0	2	2	2	1	2	2	0	1	2	1	1	0	0	0	1	0	0	0	0	0	1	0	0	0	0	0	0	1	0	0	0	1	1	0	1	0	0	0	1	1	1	1	0	0
1603	0	1	1	1	0	2	2	2	1	2	2	0	1	2	1	0	0	0	0	1	0	0	0	0	0	1	0	0	0	0	0	0	1	0	0	0	1	1	0	1	0	0	0	1	1	1	1	0	0
1604	0	1	1	1	2	2	2	2	2	0	0	1	0	1	1	0	0	0	1	0	1	0	0	0	1	1	0	1	1	0	0	2	0	0	0	0	0	2	0	0	0	0	0	0	2	2	1	0	0
1605	1	0	1	1	2	1	1	1	1	0	1	1	1	2	2	2	0	0	0	2	0	0	0	0	0	2	0	1	1	0	1	0	1	0	0	0	0	2	0	2	0	2	1	2	0	0	0	0	0
1606	0	1	1	1	1	2	2	2	1	1	2	0	1	2	2	2	0	0	1	1	1	1	0	0	0	1	0	0	0	1	1	0	0	0	0	0	0	2	0	2	0	1	0	2	0	0	0	1	0
1607	1	1	0	0	0	1	1	1	0	1	1	1	0	1	1	2	0	0	1	1	1	1	0	0	0	1	0	0	0	1	1	0	0	0	0	0	0	2	0	2	0	1	0	2	0	0	0	1	0
1608	2	0	0	0	2	0	0	0	0	0	0	2	0	1	1	2	0	0	1	1	1	1	0	0	0	1	0	0	0	1	1	0	1	0	0	0	0	2	0	2	0	1	0	2	0	0	0	1	0
1609	1	1	0	0	1	1	1	1	1	0	0	1	0	0	0	2	0	0	1	1	1	1	0	0	0	1	0	1	1	1	0	0	0	0	0	0	1	1	0	1	0	0	0	1	1	1	0	1	0
1610	1	1	0	0	0	1	1	1	1	0	0	1	0	0	0	2	0	0	1	1	1	1	0	0	0	1	0	0	0	2	0	0	0	0	0	0	0	1	0	1	0	0	0	1	1	1	0	1	0
1611	0	0	2	2	1	1	1	1	1	1	2	2	0	2	2	2	0	0	0	2	0	0	0	0	0	1	0	1	1	0	0	0	0	0	0	0	1	1	0	1	0	1	1	1	1	1	0	0	0
1612	1	1	0	0	0	1	1	1	1	0	0	2	0	1	1	2	0	0	1	1	1	1	0	0	0	1	0	1	1	1	0	0	0	0	0	0	1	1	0	1	0	0	0	1	1	1	0	1	0
1613	0	0	2	2	1	1	1	1	1	1	2	1	1	2	2	2	0	0	0	2	0	0	0	0	0	1	0	1	1	0	0	0	0	0	0	0	1	1	0	1	0	1	1	1	1	1	0	0	0
1614	0	1	1	1	2	2	2	2	2	0	1	0	1	1	1	1	0	0	0	2	0	0	0	0	0	2	0	2	2	0	0	0	0	0	0	0	0	1	0	1	0	1	1	2	0	0	1	0	0
1615	1	1	0	0	0	0	0	0	0	1	1	2	0	1	1	2	0	0	0	2	0	0	0	0	0	2	0	2	2	0	0	0	0	0	0	0	1	1	0	1	0	1	1	1	1	1	0	0	0
1616	1	0	1	1	0	0	0	0	0	1	1	2	0	1	1	2	0	0	1	1	1	1	0	0	0	0	0	0	0	1	0	0	0	0	0	0	0	1	0	1	0	0	0	2	0	0	1	1	0
1617	2	0	0	0	2	0	0	0	0	1	1	0	1	1	0	1	0	0	1	0	1	0	2	2	0	0	0	0	0	0	0	0	1	1	0	0	0	0	0	2	0	0	0	1	1	1	2	0	0
1618	1	0	1	1	2	0	0	0	0	1	1	0	1	1	0	1	0	0	2	0	2	0	1	1	0	1	0	0	0	0	1	0	1	1	0	0	0	0	0	2	0	0	0	1	1	1	2	0	0
1619	1	0	1	1	2	0	0	0	0	1	1	1	0	0	0	0	0	0	2	0	2	0	1	1	0	1	0	0	0	0	0	0	1	1	1	1	0	2	0	1	1	0	0	1	1	1	2	0	0
1620	1	1	0	0	2	0	0	0	0	2	1	1	0	0	0	1	0	0	0	0	0	0	1	1	1	0	0	0	0	0	0	1	1	1	1	1	0	2	0	1	0	0	0	0	0	2	1	0	0
1621	0	1	1	1	2	1	1	1	1	1	0	1	1	0	0	0	1	1	1	0	1	0	0	0	1	1	0	0	0	0	1	0	2	1	1	1	1	0	0	0	1	1	0	0	1	1	0	1	0
1622	1	1	0	0	2	0	0	0	0	1	1	0	1	0	0	0	1	1	1	0	1	0	0	0	1	1	0	0	0	0	1	0	2	1	1	1	1	0	0	0	1	0	0	0	2	2	1	0	0
1623	0	1	0	0	2	1	1	1	0	2	1	0	1	0	0	0	0	0	2	0	2	0	1	1	0	1	0	0	0	0	1	0	0	0	0	0	1	0	0	1	0	2	0	0	0	0	1	1	0
1624	0	1	1	1	2	0	0	0	0	0	0	1	1	0	0	0	1	1	2	0	2	0	1	1	0	1	0	0	0	0	1	0	2	0	0	0	1	0	0	1	0	0	0	1	1	1	2	0	0
1625	1	0	1	1	0	1	1	1	0	1	2	0	1	2	1	0	0	0	1	0	1	0	0	0	1	0	0	0	0	0	0	1	0	0	0	0	1	0	0	1	1	0	0	2	0	0	1	0	1
1626	1	0	1	1	0	1	1	1	0	1	2	0	1	2	1	0	0	0	2	0	2	0	0	0	1	0	0	0	0	0	0	1	0	0	0	0	0	1	0	0	0	0	0	0	2	2	1	0	1
1627	1	0	1	1	0	1	1	1	0	1	2	0	0	2	1	0	0	0	1	0	1	0	0	0	1	0	0	0	0	0	0	1	1	0	0	0	1	0	0	1	1	0	0	2	0	0	1	0	1
1628	1	0	1	1	0	1	1	1	0	1	2	0	0	2	1	0	0	0	0	0	0	0	0	0	0	1	0	0	0	0	1	1	1	0	0	0	1	0	0	1	0	0	0	1	1	1	0	0	1
1629	0	1	1	1	2	1	1	1	0	1	1	1	1	1	0	2	1	1	0	0	0	0	0	0	1	0	1	0	0	1	0	1	1	0	0	0	0	0	0	1	1	1	1	1	1	1	0	0	0
1630	1	1	0	0	0	2	2	2	0	1	0	1	1	0	0	1	1	1	0	0	0	0	0	0	1	0	1	0	0	1	0	1	1	0	0	0	0	0	0	1	1	1	1	1	1	1	0	0	1
1631	0	1	1	1	0	1	1	1	0	1	1	0	1	1	0	2	1	1	0	0	0	0	0	0	1	0	1	0	0	1	0	1	1	0	0	0	0	0	0	1	1	1	1	1	1	1	0	0	0
1632	1	1	0	0	0	2	2	2	0	1	0	1	1	1	0	1	0	0	0	0	0	0	0	0	2	0	1	0	0	1	0	0	1	0	0	0	0	0	0	1	1	2	1	1	0	0	0	0	1
1633	1	1	0	0	0	1	1	1	0	1	1	0	1	1	1	2	0	0	1	1	1	1	0	0	0	0	0	0	0	1	0	0	0	0	0	0	1	1	0	1	0	1	0	1	0	0	0	1	0
1634	1	0	1	1	2	1	1	1	1	0	1	1	1	2	2	2	0	0	0	2	0	0	0	0	0	1	0	1	1	0	0	0	1	0	0	0	1	1	0	1	0	2	1	1	0	0	0	0	0
1635	1	0	1	1	2	1	1	1	1	0	1	1	1	2	2	2	0	0	0	2	0	0	0	0	0	2	0	1	1	0	1	0	1	0	0	0	0	2	0	2	0	2	1	2	0	0	0	0	0
1636	1	1	0	0	0	1	1	1	0	1	1	0	1	2	2	2	0	0	1	1	1	1	0	0	0	0	0	0	0	1	0	0	0	0	0	0	0	2	0	2	0	1	0	1	0	0	0	1	0
1637	0	2	0	0	0	0	0	0	0	2	1	1	0	2	1	2	0	0	1	1	1	0	0	0	1	1	1	1	1	1	0	1	1	1	0	0	0	0	0	0	0	1	1	1	1	1	1	0	0
1638	0	2	0	0	0	1	1	1	0	1	2	2	0	2	1	2	1	1	1	0	1	0	0	0	0	1	0	0	1	0	0	1	0	1	0	0	0	0	0	0	0	1	1	1	1	1	1	0	0
1639	0	1	1	1	2	1	1	1	1	1	0	0	1	0	0	0	1	1	2	0	2	0	1	1	0	1	0	0	0	0	1	0	2	0	0	0	1	0	0	1	0	1	0	1	0	0	1	1	0
1640	1	1	0	0	2	1	1	1	1	2	0	0	1	0	0	1	1	1	1	0	0	0	0	0	1	1	0	0	0	0	1	0	2	1	1	1	1	0	0	0	0	1	0	0	1	1	0	1	0
1641	1	1	0	0	2	0	0	0	0	1	1	0	1	0	0	0	1	1	1	0	1	0	0	0	1	1	0	0	0	0	1	0	2	1	1	1	1	0	0	0	1	0	0	0	2	2	1	0	0
1642	1	1	1	1	2	0	0	0	0	1	0	0	1	0	0	0	1	1	2	0	2	0	1	1	0	1	0	0	0	0	1	0	2	0	0	0	1	0	0	1	0	0	0	1	1	1	2	0	0
1643	0	2	0	0	1	0	0	0	0	1	2	1	1	0	0	1	1	1	2	0	2	0	0	0	0	1	0	0	0	0	1	0	2	1	1	1	1	0	0	0	0	2	0	0	0	0	0	1	1
1644	0	2	0	0	1	1	1	1	1	2	1	1	1	0	0	1	1	1	1	1	1	0	1	1	0	1	0	0	0	0	2	0	2	0	0	0	1	0	0	1	0	1	0	0	1	1	1	1	0
1645	0	2	0	0	1	0	0	0	0	1	2	1	1	0	0	2	1	1	1	1	1	0	1	1	0	1	0	0	0	0	2	0	2	0	0	0	1	0	0	1	0	0	0	0	2	2	2	0	0
1646	0	2	0	0	1	1	1	1	1	2	1	1	1	0	0	2	1	1	2	0	2	0	0	0	0	1	0	0	0	0	1	0	2	1	1	1	1	0	0	0	0	2	0	0	0	0	0	1	1
1647	1	0	1	1	2	0	0	0	0	1	1	0	1	0	0	1	0	0	2	0	2	0	1	1	0	1	0	0	0	0	1	0	1	1	0	0	1	0	0	2	0	0	0	2	0	0	1	1	0
1648	1	0	1	1	2	0	0	0	0	1	1	1	0	0	0	1	0	0	2	0	2	0	1	1	0	1	0	0	0	0	1	0	1	1	0	0	1	0	0	2	0	0	0	2	0	0	1	1	0
1649	0	1	1	1	2	0	0	0	0	2	1	1	0	0	0	0	0	0	0	0	0	0	1	1	1	0	0	0	0	0	0	1	1	1	1	1	0	2	0	1	1	0	0	0	1	2	1	0	0
1650	0	1	1	1	2	0	0	0	0	2	1	1	0	0	0	0	0	0	1	0	1	0	0	0	1	1	0	0	0	0	1	1	1	1	1	1	1	1	0	1	1	0	0	1	0	1	0	1	0
1651	1	0	1	1	0	1	1	1	0	1	2	1	1	2	1	0	0	0	0	0	0	0	0	0	0	1	0	0	0	0	1	1	0	0	0	0	1	0	0	1	0	0	0	1	1	1	0	0	2
1652	1	0	1	1	0	1	1	1	1	0	1	1	0	2	1	0	0	0	1	0	1	0	0	0	0	2	0	2	2	0	0	2	1	0	0	0	0	1	0	0	0	0	0	0	2	2	0	0	1
1653	1	0	1	1	0	1	1	1	1	1	1	1	1	2	1	0	0	0	2	0	2	0	0	0	1	1	0	1	1	0	0	2	0	0	0	0	0	1	0	0	0	0	0	0	2	2	0	0	1
1654	1	0	1	1	0	1	1	1	1	0	1	1	0	2	1	0	0	0	1	0	1	0	0	0	0	2	0	1	1	0	1	2	1	0	0	0	0	1	0	0	0	0	0	0	2	2	0	0	1
1655	1	0	1	1	0	1	1	1	0	1	2	0	1	2	1	0	0	0	1	0	1	0	0	0	1	0	0	0	0	0	0	1	0	0	0	0	1	0	0	1	1	0	0	2	0	0	1	0	1
1656	1	0	1	1	0	1	1	1	0	1	2	0	1	2	1	0	0	0	1	0	1	0	0	0	1	0	0	0	0	0	0	1	0	0	0	0	1	0	0	1	1	0	0	2	0	0	1	0	1
1657	1	0	1	1	0	1	1	1	0	1	2	1	0	2	1	0	0	0	0	0	0	0	0	0	0	1	0	0	0	0	1	1	1	0	0	0	1	0	0	1	0	0	0	1	1	1	0	0	1
1658	1	0	1	1	0	1	1	1	0	1	2	0	0	2	1	0	0	0	0	0	0	0	0	0	0	1	0	0	0	0	1	1	1	0	0	0	1	0	0	1	0	0	0	1	1	1	0	0	1
1659	2	0	0	0	2	0	0	0	0	0	0	2	0	1	1	2	0	0	1	1	1	1	0	0	0	1	0	0	0	1	1	0	1	0	0	0	0	2	0	2	0	1	0	2	0	0	0	1	0
1660	2	0	0	0	2	0	0	0	0	0	0	2	0	1	1	2	0	0	1	1	1	1	0	0	0	1	0	0	0	1	1	0	1	0	0	0	1	1	0	2	0	1	0	2	0	0	0	1	0
1661	1	0	1	1	2	1	1	1	1	0	1	1	1	2	2	2	0	0	0	2	0	0	0	0	0	2	0	1	1	0	1	0	1	0	0	0	0	2	0	2	0	2	1	2	0	0	0	0	0
1662	1	1	0	0	0	1	1	1	0	1	1	1	0	1	1	1	0	0	1	1	1	1	0	0	0	0	0	0	0	1	0	0	0	0	0	0	1	1	0	1	0	1	0	1	0	0	0	1	0
1663	1	1	0	0	2	0	0	0	0	1	1	0	1	0	0	0	1	1	0	0	0	0	0	0	1	1	0	0	0	0	1	0	2	1	1	1	1	0	0	0	0	0	0	0	0	0	1	0	0
1664	0	1	1	1	2	1	1	1	1	1	0	0	1	0	0	1	1	1	2	0	2	0	1	1	0	1	0	0	0	0	1	0	2	0	0	0	1	0	0	1	0	1	0	1	0	0	1	1	0
1665	1	1	0	0	2	1	1	1	1	2	0	0	1	0	0	0	2	1	2	0	2	0	1	1	0	1	0	0	0	0	1	0	2	0	0	0	1	0	0	1	0	1	0	1	0	0	1	1	0
1666	1	1	0	0	2	0	0	0	0	1	1	0	1	0	0	0	1	1	1	0	1	0	0	0	1	1	0	0	0	0	1	0	2	1	1	1	1	0	0	0	1	0	0	0	2	2	1	0	0
1667	1	1	0	0	0	1	1	1	0	1	1	0	1	0	0	2	2	2	1	0	0	1	0	0	1	0	0	0	0	1	0	0	1	0	0	0	0	0	0	1	1	2	1	1	1	1	0	0	0
1668	1	1	0	0	0	2	2	2	0	1	0	0	1	0	0	2	0	0	0	0	0	0	0	0	2	0	1	0	0	1	0	0	1	0	0	0	0	0	0	1	1	2	1	1	0	0	0	0	0
1669	1	1	0	0	0	2	2	2	0	1	0	1	1	0	0	1	0	0	0	0	0	0	0	0	2	0	1	0	0	1	0	0	1	0	0	0	0	0	0	1	2	2	1	1	0	0	0	0	0
1670	1	1	0	0	0	1	1	1	0	1	1	0	1	0	0	1	2	2	1	0	0	1	0	0	0	0	0	0	0	1	0	1	1	0	0	0	0	0	0	1	0	2	1	1	0	0	0	0	1
1671	0	2	0	0	1	0	0	0	0	1	2	1	1	0	0	2	1	1	2	0	2	0	0	0	0	1	0	0	0	0	1	0	2	1	1	1	1	0	0	0	0	1	0	0	1	1	1	0	1
1672	0	2	0	0	1	1	1	1	0	1	2	1	1	0	0	0	1	1	1	1	1	0	1	1	0	1	0	0	0	0	2	0	1	0	0	0	1	0	0	1	0	1	0	0	1	1	1	1	0
1673	0	2	0	0	1	2	2	2	1	2	1	1	1	0	0	0	1	1	1	1	1	0	1	1	0	1	0	0	0	0	2	0	1	0	0	0	1	0	0	1	0	1	0	0	1	1	1	1	0
693	0	1	0	0	2	0	0	0	0	1	0	2	0	1	0	1	0	0	1	1	1	0	0	0	1	1	0	1	1	0	0	0	0	0	0	0	1	1	0	1	0	1	1	1	1	1	1	0	1
[truncated: 2,519 more columns]
